# Supplementary material
Source: publisher figshare collection journal article supplement (https://gsajournals.figshare.com/ndownloader/files/15139661)
Supplement: Supplementary file 1 [file 15139661]

## Sheet: Sheet1
line_name	population/pedigree_number	pedigree	set	year	location	replication	plot	range	row	yield	protein	oil	days_to_maturity
AG6534	check	check	Set1	Year_2014	Athens	Rep1	141	4	15	2098.2	43.02	20.58	38
AG7733	check	check	Set1	Year_2014	Athens	Rep1	106	1	17	2286.5	42.33	19.39	50
G13-2314R2	Pop1	AU02-3104 x G00-3213(3)R2	Set1	Year_2014	Athens	Rep1	144	4	12	3254.9	41.67	20.37	48
G13-2315R2	Pop1	AU02-3104 x G00-3213(3)R2	Set1	Year_2014	Athens	Rep1	105	1	16	3180.93	40.44	21.22	43
G13-2335R2	Pop1	AU02-3104 x G00-3213(3)R2	Set1	Year_2014	Athens	Rep1	140	4	16	2407.55	40.02	21.61	41
G13-2346R2	Pop1	AU02-3104 x G00-3213(3)R2	Set1	Year_2014	Athens	Rep1	129	3	18	2528.6	40.89	21.64	40
G13-2350R2	Pop1	AU02-3104 x G00-3213(3)R2	Set1	Year_2014	Athens	Rep1	107	1	18	3611.32	41.32	19.56	44
G13-2351R2	Pop1	AU02-3104 x G00-3213(3)R2	Set1	Year_2014	Athens	Rep1	110	1	21	3127.12	40.87	19.77	41
G13-2361R2	Pop1	AU02-3104 x G00-3213(3)R2	Set1	Year_2014	Athens	Rep1	136	4	20	2938.82	41.68	20.44	44
G13-2377R2	Pop1	AU02-3104 x G00-3213(3)R2	Set1	Year_2014	Athens	Rep1	114	2	20	2602.57	41.1	21.5	43
G13-2378R2	Pop1	AU02-3104 x G00-3213(3)R2	Set1	Year_2014	Athens	Rep1	111	1	22	3288.53	42.07	20.48	49
G13-2390R2	Pop1	AU02-3104 x G00-3213(3)R2	Set1	Year_2014	Athens	Rep1	138	4	18	3012.8	41.87	21.3	43
G13-2405R2	Pop1	AU02-3104 x G00-3213(3)R2	Set1	Year_2014	Athens	Rep1	132	3	21	2636.2	39.42	20.95	41
G13-2412R2	Pop1	AU02-3104 x G00-3213(3)R2	Set1	Year_2014	Athens	Rep1	124	3	13	2985.9	41.59	21.01	42
G13-2435R2	Pop1	AU02-3104 x G00-3213(3)R2	Set1	Year_2014	Athens	Rep1	135	4	21	2400.82	41.3	20.32	42
G13-2449R2	Pop1	AU02-3104 x G00-3213(3)R2	Set1	Year_2014	Athens	Rep1	115	2	19	2985.9	40.09	20.32	42
G13-2451R2	Pop1	AU02-3104 x G00-3213(3)R2	Set1	Year_2014	Athens	Rep1	139	4	17	2837.95	42.19	20.4	43
G13-2454R2	Pop1	AU02-3104 x G00-3213(3)R2	Set1	Year_2014	Athens	Rep1	103	1	14	3234.72	39.84	20.68	48
G13-2469R2	Pop1	AU02-3104 x G00-3213(3)R2	Set1	Year_2014	Athens	Rep1	118	2	16	2858.12	39.63	20.68	44
G13-2471R2	Pop1	AU02-3104 x G00-3213(3)R2	Set1	Year_2014	Athens	Rep1	119	2	15	3066.6	40.43	22.03	41
G13-2473R2	Pop1	AU02-3104 x G00-3213(3)R2	Set1	Year_2014	Athens	Rep1	117	2	17	2837.95	40.06	21.03	44
G13-2476R2	Pop1	AU02-3104 x G00-3213(3)R2	Set1	Year_2014	Athens	Rep1	127	3	16	3032.97	39.59	21.77	39
G13-2484R2	Pop1	AU02-3104 x G00-3213(3)R2	Set1	Year_2014	Athens	Rep1	121	2	13	2225.97	41.4	20.27	46
G13-2486R2	Pop1	AU02-3104 x G00-3213(3)R2	Set1	Year_2014	Athens	Rep1	126	3	15	2999.35	40.76	21.29	39
G13-2489R2	Pop1	AU02-3104 x G00-3213(3)R2	Set1	Year_2014	Athens	Rep1	122	2	12	2521.88	43.16	19.87	45
G13-2547R2	Pop1	AU02-3104 x G00-3213(3)R2	Set1	Year_2014	Athens	Rep1	125	3	14	2683.28	40.93	20.56	40
G13-2559R2	Pop1	AU02-3104 x G00-3213(3)R2	Set1	Year_2014	Athens	Rep1	137	4	19	3133.85	40.71	21.11	42
G13-2587R2	Pop1	AU02-3104 x G00-3213(3)R2	Set1	Year_2014	Athens	Rep1	123	3	12	3759.28	40.53	21.87	43
G13-2605R2	Pop1	AU02-3104 x G00-3213(3)R2	Set1	Year_2014	Athens	Rep1	143	4	13	3140.57	41.29	20.42	45
G13-2606R2	Pop1	AU02-3104 x G00-3213(3)R2	Set1	Year_2014	Athens	Rep1	133	3	22	2427.72	39.34	20.98	42
G13-2608R2	Pop1	AU02-3104 x G00-3213(3)R2	Set1	Year_2014	Athens	Rep1	101	1	12	2979.18	42.21	20.4	50
G13-2611R2	Pop1	AU02-3104 x G00-3213(3)R2	Set1	Year_2014	Athens	Rep1	113	2	21	2421	39.94	20.51	43
G13-2613R2	Pop1	AU02-3104 x G00-3213(3)R2	Set1	Year_2014	Athens	Rep1	112	2	22	3147.3	40.58	20.74	42
G13-2617R2	Pop1	AU02-3104 x G00-3213(3)R2	Set1	Year_2014	Athens	Rep1	128	3	17	3550.8	40.89	20.51	40
G13-2618R2	Pop1	AU02-3104 x G00-3213(3)R2	Set1	Year_2014	Athens	Rep1	120	2	14	2985.9	40.46	20.07	42
G13-2636R2	Pop1	AU02-3104 x G00-3213(3)R2	Set1	Year_2014	Athens	Rep1	130	3	19	2831.22	39.67	20.4	43
G13-2648R2	Pop1	AU02-3104 x G00-3213(3)R2	Set1	Year_2014	Athens	Rep1	102	1	13	2777.43	39.57	20.32	48
G13-2680R2	Pop1	AU02-3104 x G00-3213(3)R2	Set1	Year_2014	Athens	Rep1	134	4	22	2501.7	42.4	19.46	44
G13-2682R2	Pop1	AU02-3104 x G00-3213(3)R2	Set1	Year_2014	Athens	Rep1	131	3	20	2710.18	39.02	22.45	41
G13-2685R2	Pop1	AU02-3104 x G00-3213(3)R2	Set1	Year_2014	Athens	Rep1	104	1	15	2763.97	39.09	21.11	42
G13-2692R2	Pop1	AU02-3104 x G00-3213(3)R2	Set1	Year_2014	Athens	Rep1	142	4	14	3470.1	39.61	21.72	43
G13-2693R2	Pop1	AU02-3104 x G00-3213(3)R2	Set1	Year_2014	Athens	Rep1	116	2	18	3133.85	42.13	21.32	42
G13-2696R2	Pop1	AU02-3104 x G00-3213(3)R2	Set1	Year_2014	Athens	Rep1	109	1	20	2737.07	40.67	20.76	42
G13-2699R2	Pop1	AU02-3104 x G00-3213(3)R2	Set1	Year_2014	Athens	Rep1	108	1	19	3893.78	40.34	21.41	41
AG6534	check	check	Set1	Year_2014	Athens	Rep2	244	8	12	2602.57	42.89	20.68	44
AG7733	check	check	Set1	Year_2014	Athens	Rep2	204	5	15	1869.55	42.06	19.73	49
G13-2314R2	Pop1	AU02-3104 x G00-3213(3)R2	Set1	Year_2014	Athens	Rep2	239	8	17	3187.65	40.66	21.11	45
G13-2315R2	Pop1	AU02-3104 x G00-3213(3)R2	Set1	Year_2014	Athens	Rep2	228	7	17	3113.68	41.08	21.17	38
G13-2335R2	Pop1	AU02-3104 x G00-3213(3)R2	Set1	Year_2014	Athens	Rep2	202	5	13	2763.97	40.23	21.39	44
G13-2346R2	Pop1	AU02-3104 x G00-3213(3)R2	Set1	Year_2014	Athens	Rep2	236	8	20	3591.15	38.98	21.99	43
G13-2350R2	Pop1	AU02-3104 x G00-3213(3)R2	Set1	Year_2014	Athens	Rep2	215	6	19	2494.97	40.8	20.45	42
G13-2351R2	Pop1	AU02-3104 x G00-3213(3)R2	Set1	Year_2014	Athens	Rep2	206	5	17	2340.3	40.52	20.54	42
G13-2361R2	Pop1	AU02-3104 x G00-3213(3)R2	Set1	Year_2014	Athens	Rep2	224	7	13	3698.75	40.13	21.32	46
G13-2377R2	Pop1	AU02-3104 x G00-3213(3)R2	Set1	Year_2014	Athens	Rep2	225	7	14	3093.5	41.27	21.3	44
G13-2378R2	Pop1	AU02-3104 x G00-3213(3)R2	Set1	Year_2014	Athens	Rep2	208	5	19	2373.93	42.06	20.54	45
G13-2390R2	Pop1	AU02-3104 x G00-3213(3)R2	Set1	Year_2014	Athens	Rep2	237	8	19	2844.68	40.73	21.73	44
G13-2405R2	Pop1	AU02-3104 x G00-3213(3)R2	Set1	Year_2014	Athens	Rep2	201	5	12	3315.43	39.07	20.84	43
G13-2412R2	Pop1	AU02-3104 x G00-3213(3)R2	Set1	Year_2014	Athens	Rep2	242	8	14	3012.8	39.36	22.6	42
G13-2435R2	Pop1	AU02-3104 x G00-3213(3)R2	Set1	Year_2014	Athens	Rep2	227	7	16	2763.97	40.34	21.76	42
G13-2449R2	Pop1	AU02-3104 x G00-3213(3)R2	Set1	Year_2014	Athens	Rep2	231	7	20	2985.9	40.76	20.78	43
G13-2451R2	Pop1	AU02-3104 x G00-3213(3)R2	Set1	Year_2014	Athens	Rep2	212	6	22	2246.15	41.46	20.68	45
G13-2454R2	Pop1	AU02-3104 x G00-3213(3)R2	Set1	Year_2014	Athens	Rep2	211	5	22	2205.8	40.67	20.73	48
G13-2469R2	Pop1	AU02-3104 x G00-3213(3)R2	Set1	Year_2014	Athens	Rep2	233	7	22	2232.7	40.94	20.99	43
G13-2471R2	Pop1	AU02-3104 x G00-3213(3)R2	Set1	Year_2014	Athens	Rep2	241	8	15	2494.97	39.97	22.05	41
G13-2473R2	Pop1	AU02-3104 x G00-3213(3)R2	Set1	Year_2014	Athens	Rep2	219	6	15	2360.47	39.78	21.24	43
G13-2476R2	Pop1	AU02-3104 x G00-3213(3)R2	Set1	Year_2014	Athens	Rep2	229	7	18	3328.88	39.82	21.77	44
G13-2484R2	Pop1	AU02-3104 x G00-3213(3)R2	Set1	Year_2014	Athens	Rep2	217	6	17	2104.93	41.2	20.83	42
G13-2486R2	Pop1	AU02-3104 x G00-3213(3)R2	Set1	Year_2014	Athens	Rep2	207	5	18	3234.72	40.32	21.5	42
G13-2489R2	Pop1	AU02-3104 x G00-3213(3)R2	Set1	Year_2014	Athens	Rep2	221	6	13	2589.12	41.74	20.53	44
G13-2547R2	Pop1	AU02-3104 x G00-3213(3)R2	Set1	Year_2014	Athens	Rep2	214	6	20	2454.62	40.67	20.26	41
G13-2559R2	Pop1	AU02-3104 x G00-3213(3)R2	Set1	Year_2014	Athens	Rep2	230	7	19	2494.97	40.7	20.79	43
G13-2587R2	Pop1	AU02-3104 x G00-3213(3)R2	Set1	Year_2014	Athens	Rep2	222	6	12	3402.85	39.75	22.15	45
G13-2605R2	Pop1	AU02-3104 x G00-3213(3)R2	Set1	Year_2014	Athens	Rep2	226	7	15	2232.7	41.27	20.59	43
G13-2606R2	Pop1	AU02-3104 x G00-3213(3)R2	Set1	Year_2014	Athens	Rep2	203	5	14	3752.55	39.15	21.41	48
G13-2608R2	Pop1	AU02-3104 x G00-3213(3)R2	Set1	Year_2014	Athens	Rep2	216	6	18	2716.9	40.27	21.36	43
G13-2611R2	Pop1	AU02-3104 x G00-3213(3)R2	Set1	Year_2014	Athens	Rep2	223	7	12	2972.45	39.83	21.25	49
G13-2613R2	Pop1	AU02-3104 x G00-3213(3)R2	Set1	Year_2014	Athens	Rep2	234	8	22	2965.72	40.82	21.15	45
G13-2617R2	Pop1	AU02-3104 x G00-3213(3)R2	Set1	Year_2014	Athens	Rep2	205	5	16	3275.07	39.78	21.31	45
G13-2618R2	Pop1	AU02-3104 x G00-3213(3)R2	Set1	Year_2014	Athens	Rep2	235	8	21	3019.53	40.06	20.7	43
G13-2636R2	Pop1	AU02-3104 x G00-3213(3)R2	Set1	Year_2014	Athens	Rep2	213	6	21	2750.53	38.94	20.95	43
G13-2648R2	Pop1	AU02-3104 x G00-3213(3)R2	Set1	Year_2014	Athens	Rep2	218	6	16	3053.15	39.64	21.53	46
G13-2680R2	Pop1	AU02-3104 x G00-3213(3)R2	Set1	Year_2014	Athens	Rep2	232	7	21	2797.6	42	19.66	44
G13-2682R2	Pop1	AU02-3104 x G00-3213(3)R2	Set1	Year_2014	Athens	Rep2	240	8	16	3093.5	40.09	21.56	44
G13-2685R2	Pop1	AU02-3104 x G00-3213(3)R2	Set1	Year_2014	Athens	Rep2	209	5	20	2360.47	40.12	20.15	40
G13-2692R2	Pop1	AU02-3104 x G00-3213(3)R2	Set1	Year_2014	Athens	Rep2	243	8	13	3853.43	38.78	22.64	45
G13-2693R2	Pop1	AU02-3104 x G00-3213(3)R2	Set1	Year_2014	Athens	Rep2	220	6	14	2737.07	41.9	20.55	45
G13-2696R2	Pop1	AU02-3104 x G00-3213(3)R2	Set1	Year_2014	Athens	Rep2	238	8	18	2844.68	39.56	21.84	45
G13-2699R2	Pop1	AU02-3104 x G00-3213(3)R2	Set1	Year_2014	Athens	Rep2	210	5	21	2703.45	40.64	21.22	44
AG7733	check	check	Set2	Year_2014	Athens	Rep1	112	2	11	2481.53	39.22	20.78	49
AG7934	check	check	Set2	Year_2014	Athens	Rep1	101	1	1	2326.85	40.29	20.83	53
G13-2304R2	Pop1	AU02-3104 x G00-3213(3)R2	Set2	Year_2014	Athens	Rep1	122	2	1	2811.05	38.88	21.33	45
G13-2307R2	Pop1	AU02-3104 x G00-3213(3)R2	Set2	Year_2014	Athens	Rep1	115	2	8	2770.7	37.85	21.72	50
G13-2312R2	Pop1	AU02-3104 x G00-3213(3)R2	Set2	Year_2014	Athens	Rep1	135	4	10	2777.43	40.28	21.32	45
G13-2322R2	Pop1	AU02-3104 x G00-3213(3)R2	Set2	Year_2014	Athens	Rep1	129	3	7	2831.22	40.36	21.16	50
G13-2324R2	Pop1	AU02-3104 x G00-3213(3)R2	Set2	Year_2014	Athens	Rep1	131	3	9	2777.43	39.08	20.75	41
G13-2353R2	Pop1	AU02-3104 x G00-3213(3)R2	Set2	Year_2014	Athens	Rep1	110	1	10	2811.05	36.12	22.72	45
G13-2355R2	Pop1	AU02-3104 x G00-3213(3)R2	Set2	Year_2014	Athens	Rep1	128	3	6	2299.95	38.49	22.68	52
G13-2366R2	Pop1	AU02-3104 x G00-3213(3)R2	Set2	Year_2014	Athens	Rep1	105	1	5	2710.18	40.46	22.07	49
G13-2368R2	Pop1	AU02-3104 x G00-3213(3)R2	Set2	Year_2014	Athens	Rep1	111	1	11	3059.88	42.05	20.34	52
G13-2372R2	Pop1	AU02-3104 x G00-3213(3)R2	Set2	Year_2014	Athens	Rep1	125	3	3	3100.22	39.55	21.63	44
G13-2375R2	Pop1	AU02-3104 x G00-3213(3)R2	Set2	Year_2014	Athens	Rep1	143	4	2	2427.72	41.49	20.48	49
G13-2376R2	Pop1	AU02-3104 x G00-3213(3)R2	Set2	Year_2014	Athens	Rep1	133	3	11	2515.15	38.55	20.75	50
G13-2379R2	Pop1	AU02-3104 x G00-3213(3)R2	Set2	Year_2014	Athens	Rep1	127	3	5	2885.03	38.64	21.89	48
G13-2384R2	Pop1	AU02-3104 x G00-3213(3)R2	Set2	Year_2014	Athens	Rep1	119	2	4	2851.4	38.14	21.58	42
G13-2385R2	Pop1	AU02-3104 x G00-3213(3)R2	Set2	Year_2014	Athens	Rep1	124	3	2	2797.6	39.31	21.35	47
G13-2387R2	Pop1	AU02-3104 x G00-3213(3)R2	Set2	Year_2014	Athens	Rep1	113	2	10	2932.1	40.1	20.75	46
G13-2389R2	Pop1	AU02-3104 x G00-3213(3)R2	Set2	Year_2014	Athens	Rep1	106	1	6	2730.35	38.76	21.39	52
G13-2394R2	Pop1	AU02-3104 x G00-3213(3)R2	Set2	Year_2014	Athens	Rep1	130	3	8	2763.97	39.89	20.31	50
G13-2400R2	Pop1	AU02-3104 x G00-3213(3)R2	Set2	Year_2014	Athens	Rep1	141	4	4	2804.32	38.87	20.49	52
G13-2401R2	Pop1	AU02-3104 x G00-3213(3)R2	Set2	Year_2014	Athens	Rep1	118	2	5	2609.3	38.77	22.19	42
G13-2407R2	Pop1	AU02-3104 x G00-3213(3)R2	Set2	Year_2014	Athens	Rep1	137	4	8	2575.68	38.61	20.54	44
G13-2414R2	Pop1	AU02-3104 x G00-3213(3)R2	Set2	Year_2014	Athens	Rep1	114	2	9	2938.82	40	21.26	49
G13-2418R2	Pop1	AU02-3104 x G00-3213(3)R2	Set2	Year_2014	Athens	Rep1	126	3	4	2750.53	38.92	21.48	43
G13-2421R2	Pop1	AU02-3104 x G00-3213(3)R2	Set2	Year_2014	Athens	Rep1	123	3	1	2676.55	40.29	21.57	45
G13-2453R2	Pop1	AU02-3104 x G00-3213(3)R2	Set2	Year_2014	Athens	Rep1	116	2	7	3201.1	38.38	21.09	50
G13-2463R2	Pop1	AU02-3104 x G00-3213(3)R2	Set2	Year_2014	Athens	Rep1	138	4	7	2723.62	40.49	21.31	46
G13-2529R2	Pop1	AU02-3104 x G00-3213(3)R2	Set2	Year_2014	Athens	Rep1	139	4	6	2165.45	39.75	20.9	51
G13-2532R2	Pop1	AU02-3104 x G00-3213(3)R2	Set2	Year_2014	Athens	Rep1	104	1	4	2690	37.78	21.51	45
G13-2533R2	Pop1	AU02-3104 x G00-3213(3)R2	Set2	Year_2014	Athens	Rep1	142	4	3	2683.28	39.48	21.46	42
G13-2534R2	Pop1	AU02-3104 x G00-3213(3)R2	Set2	Year_2014	Athens	Rep1	117	2	6	2461.35	38.56	22.51	44
G13-2536R2	Pop1	AU02-3104 x G00-3213(3)R2	Set2	Year_2014	Athens	Rep1	103	1	3	2972.45	38.46	22.76	38
G13-2551R2	Pop1	AU02-3104 x G00-3213(3)R2	Set2	Year_2014	Athens	Rep1	140	4	5	2589.12	40.9	20.99	51
G13-2579R2	Pop1	AU02-3104 x G00-3213(3)R2	Set2	Year_2014	Athens	Rep1	109	1	9	2225.97	39.84	21.29	51
G13-2596R2	Pop1	AU02-3104 x G00-3213(3)R2	Set2	Year_2014	Athens	Rep1	102	1	2	2690	40.7	21.64	53
G13-2607R2	Pop1	AU02-3104 x G00-3213(3)R2	Set2	Year_2014	Athens	Rep1	121	2	2	2972.45	38.81	21.56	53
G13-2649R2	Pop1	AU02-3104 x G00-3213(3)R2	Set2	Year_2014	Athens	Rep1	134	4	11	2454.62	40.32	21.23	43
G13-2650R2	Pop1	AU02-3104 x G00-3213(3)R2	Set2	Year_2014	Athens	Rep1	132	3	10	2447.9	37.11	22.88	51
G13-2671R2	Pop1	AU02-3104 x G00-3213(3)R2	Set2	Year_2014	Athens	Rep1	136	4	9	2387.38	38.59	20.67	48
G13-2672R2	Pop1	AU02-3104 x G00-3213(3)R2	Set2	Year_2014	Athens	Rep1	120	2	3	3167.47	38.94	21.87	46
G13-2673R2	Pop1	AU02-3104 x G00-3213(3)R2	Set2	Year_2014	Athens	Rep1	144	4	1	2205.8	40.27	20.33	42
G13-2679R2	Pop1	AU02-3104 x G00-3213(3)R2	Set2	Year_2014	Athens	Rep1	107	1	7	2992.62	39.29	22.13	50
G13-2686R2	Pop1	AU02-3104 x G00-3213(3)R2	Set2	Year_2014	Athens	Rep1	108	1	8	2528.6	42.23	19.86	50
AG7733	check	check	Set2	Year_2014	Athens	Rep2	234	8	11	2299.95	38.58	20.85	45
AG7934	check	check	Set2	Year_2014	Athens	Rep2	226	7	4	2273.05	41.77	19.85	52
G13-2304R2	Pop1	AU02-3104 x G00-3213(3)R2	Set2	Year_2014	Athens	Rep2	202	5	2	2743.8	39.66	21.01	45
G13-2307R2	Pop1	AU02-3104 x G00-3213(3)R2	Set2	Year_2014	Athens	Rep2	218	6	5	2737.07	37.62	22.04	50
G13-2312R2	Pop1	AU02-3104 x G00-3213(3)R2	Set2	Year_2014	Athens	Rep2	243	8	2	2468.07	40.93	21.36	45
G13-2322R2	Pop1	AU02-3104 x G00-3213(3)R2	Set2	Year_2014	Athens	Rep2	208	5	8	2387.38	41.29	20.65	51
G13-2324R2	Pop1	AU02-3104 x G00-3213(3)R2	Set2	Year_2014	Athens	Rep2	204	5	4	2831.22	38.48	21.07	42
G13-2353R2	Pop1	AU02-3104 x G00-3213(3)R2	Set2	Year_2014	Athens	Rep2	211	5	11	3436.47	37.72	22.08	45
G13-2355R2	Pop1	AU02-3104 x G00-3213(3)R2	Set2	Year_2014	Athens	Rep2	212	6	11	2703.45	38.89	21.99	50
G13-2366R2	Pop1	AU02-3104 x G00-3213(3)R2	Set2	Year_2014	Athens	Rep2	206	5	6	2528.6	41.82	21.51	49
G13-2368R2	Pop1	AU02-3104 x G00-3213(3)R2	Set2	Year_2014	Athens	Rep2	239	8	6	2790.88	41.44	21.72	46
G13-2372R2	Pop1	AU02-3104 x G00-3213(3)R2	Set2	Year_2014	Athens	Rep2	213	6	10	3093.5	39.94	21.23	41
G13-2375R2	Pop1	AU02-3104 x G00-3213(3)R2	Set2	Year_2014	Athens	Rep2	236	8	9	2864.85	40.22	21.12	45
G13-2376R2	Pop1	AU02-3104 x G00-3213(3)R2	Set2	Year_2014	Athens	Rep2	238	8	7	2864.85	38.05	20.97	46
G13-2379R2	Pop1	AU02-3104 x G00-3213(3)R2	Set2	Year_2014	Athens	Rep2	207	5	7	3093.5	39.41	22.06	49
G13-2384R2	Pop1	AU02-3104 x G00-3213(3)R2	Set2	Year_2014	Athens	Rep2	209	5	9	3032.97	38.89	20.71	44
G13-2385R2	Pop1	AU02-3104 x G00-3213(3)R2	Set2	Year_2014	Athens	Rep2	244	8	1	2367.2	40.53	20.9	45
G13-2387R2	Pop1	AU02-3104 x G00-3213(3)R2	Set2	Year_2014	Athens	Rep2	230	7	8	3039.7	41.33	20.07	45
G13-2389R2	Pop1	AU02-3104 x G00-3213(3)R2	Set2	Year_2014	Athens	Rep2	215	6	8	2797.6	38.46	21.88	49
G13-2394R2	Pop1	AU02-3104 x G00-3213(3)R2	Set2	Year_2014	Athens	Rep2	223	7	1	2690	41.12	20.68	50
G13-2400R2	Pop1	AU02-3104 x G00-3213(3)R2	Set2	Year_2014	Athens	Rep2	221	6	2	2521.88	38.3	20.98	48
G13-2401R2	Pop1	AU02-3104 x G00-3213(3)R2	Set2	Year_2014	Athens	Rep2	210	5	10	3026.25	37.32	22.73	42
G13-2407R2	Pop1	AU02-3104 x G00-3213(3)R2	Set2	Year_2014	Athens	Rep2	214	6	9	3066.6	37.79	21.56	41
G13-2414R2	Pop1	AU02-3104 x G00-3213(3)R2	Set2	Year_2014	Athens	Rep2	241	8	4	2636.2	41.82	20.01	48
G13-2418R2	Pop1	AU02-3104 x G00-3213(3)R2	Set2	Year_2014	Athens	Rep2	235	8	10	3301.97	36.11	21.88	41
G13-2421R2	Pop1	AU02-3104 x G00-3213(3)R2	Set2	Year_2014	Athens	Rep2	240	8	5	2972.45	40.5	21.61	45
G13-2453R2	Pop1	AU02-3104 x G00-3213(3)R2	Set2	Year_2014	Athens	Rep2	233	7	11	2784.15	39.08	20.84	46
G13-2463R2	Pop1	AU02-3104 x G00-3213(3)R2	Set2	Year_2014	Athens	Rep2	220	6	3	2696.72	40.5	21	49
G13-2529R2	Pop1	AU02-3104 x G00-3213(3)R2	Set2	Year_2014	Athens	Rep2	228	7	6	2844.68	39.48	21.66	49
G13-2532R2	Pop1	AU02-3104 x G00-3213(3)R2	Set2	Year_2014	Athens	Rep2	222	6	1	2421	40.47	20.52	39
G13-2533R2	Pop1	AU02-3104 x G00-3213(3)R2	Set2	Year_2014	Athens	Rep2	203	5	3	2730.35	38.65	22.41	42
G13-2534R2	Pop1	AU02-3104 x G00-3213(3)R2	Set2	Year_2014	Athens	Rep2	232	7	10	3113.68	39.21	21.1	42
G13-2536R2	Pop1	AU02-3104 x G00-3213(3)R2	Set2	Year_2014	Athens	Rep2	227	7	5	2965.72	39.18	22.24	38
G13-2551R2	Pop1	AU02-3104 x G00-3213(3)R2	Set2	Year_2014	Athens	Rep2	242	8	3	2743.8	40.81	21.21	51
G13-2579R2	Pop1	AU02-3104 x G00-3213(3)R2	Set2	Year_2014	Athens	Rep2	229	7	7	3032.97	41.43	20.99	48
G13-2596R2	Pop1	AU02-3104 x G00-3213(3)R2	Set2	Year_2014	Athens	Rep2	205	5	5	2858.12	41.63	21.27	49
G13-2607R2	Pop1	AU02-3104 x G00-3213(3)R2	Set2	Year_2014	Athens	Rep2	201	5	1	2582.4	40.09	20.97	53
G13-2649R2	Pop1	AU02-3104 x G00-3213(3)R2	Set2	Year_2014	Athens	Rep2	231	7	9	2817.78	40.36	21.29	41
G13-2650R2	Pop1	AU02-3104 x G00-3213(3)R2	Set2	Year_2014	Athens	Rep2	224	7	2	2360.47	40.58	21.46	50
G13-2671R2	Pop1	AU02-3104 x G00-3213(3)R2	Set2	Year_2014	Athens	Rep2	237	8	8	2669.82	37.63	21.35	46
G13-2672R2	Pop1	AU02-3104 x G00-3213(3)R2	Set2	Year_2014	Athens	Rep2	217	6	6	2373.93	39.01	21.9	48
G13-2673R2	Pop1	AU02-3104 x G00-3213(3)R2	Set2	Year_2014	Athens	Rep2	225	7	3	2716.9	40.98	20.15	47
G13-2679R2	Pop1	AU02-3104 x G00-3213(3)R2	Set2	Year_2014	Athens	Rep2	216	6	7	3053.15	40.05	21.86	50
G13-2686R2	Pop1	AU02-3104 x G00-3213(3)R2	Set2	Year_2014	Athens	Rep2	219	6	4	2750.53	41.81	20.51	50
AG6534	check	check	Set1	Year_2016	Athens	Rep1	140	4	74	3860.15	42.36	19.4	48
AG7733	check	check	Set1	Year_2016	Athens	Rep1	139	4	75	3813.07	41.59	18.65	51
G13-2314R2	Pop1	AU02-3104 x G00-3213(3)R2	Set1	Year_2016	Athens	Rep1	124	3	71	3066.6	40.83	19.55	47
G13-2315R2	Pop1	AU02-3104 x G00-3213(3)R2	Set1	Year_2016	Athens	Rep1	113	2	79	4458.68	39.4	21.31	46
G13-2335R2	Pop1	AU02-3104 x G00-3213(3)R2	Set1	Year_2016	Athens	Rep1	108	1	77	4216.57	38.45	20.84	49
G13-2346R2	Pop1	AU02-3104 x G00-3213(3)R2	Set1	Year_2016	Athens	Rep1	126	3	73	3604.6	40.64	19.9	44
G13-2350R2	Pop1	AU02-3104 x G00-3213(3)R2	Set1	Year_2016	Athens	Rep1	141	4	73	3624.78	40.44	20.11	48
G13-2351R2	Pop1	AU02-3104 x G00-3213(3)R2	Set1	Year_2016	Athens	Rep1	138	4	76	3705.47	39.07	20.58	47
G13-2361R2	Pop1	AU02-3104 x G00-3213(3)R2	Set1	Year_2016	Athens	Rep1	119	2	73	3779.45	38.08	21.15	46
G13-2377R2	Pop1	AU02-3104 x G00-3213(3)R2	Set1	Year_2016	Athens	Rep1	134	4	80	3544.07	40.74	20.42	48
G13-2378R2	Pop1	AU02-3104 x G00-3213(3)R2	Set1	Year_2016	Athens	Rep1	128	3	75	3759.28	40.04	20.28	48
G13-2390R2	Pop1	AU02-3104 x G00-3213(3)R2	Set1	Year_2016	Athens	Rep1	121	2	71	2911.93	39.73	20.48	47
G13-2405R2	Pop1	AU02-3104 x G00-3213(3)R2	Set1	Year_2016	Athens	Rep1	109	1	78	2901.84	37.09	20.37	46
G13-2412R2	Pop1	AU02-3104 x G00-3213(3)R2	Set1	Year_2016	Athens	Rep1	137	4	77	3463.38	39.06	21	46
G13-2435R2	Pop1	AU02-3104 x G00-3213(3)R2	Set1	Year_2016	Athens	Rep1	135	4	79	3597.88	40.17	20.57	46
G13-2449R2	Pop1	AU02-3104 x G00-3213(3)R2	Set1	Year_2016	Athens	Rep1	143	4	71	3698.75	39.14	20.28	47
G13-2451R2	Pop1	AU02-3104 x G00-3213(3)R2	Set1	Year_2016	Athens	Rep1	132	3	79	3490.28	39.7	20.42	47
G13-2454R2	Pop1	AU02-3104 x G00-3213(3)R2	Set1	Year_2016	Athens	Rep1	101	1	70	4122.43	37.29	20.94	49
G13-2469R2	Pop1	AU02-3104 x G00-3213(3)R2	Set1	Year_2016	Athens	Rep1	127	3	74	4061.9	37.5	20.54	47
G13-2471R2	Pop1	AU02-3104 x G00-3213(3)R2	Set1	Year_2016	Athens	Rep1	111	1	80	3940.85	38.1	20.22	49
G13-2473R2	Pop1	AU02-3104 x G00-3213(3)R2	Set1	Year_2016	Athens	Rep1	118	2	74	3887.05	37.75	20.5	46
G13-2476R2	Pop1	AU02-3104 x G00-3213(3)R2	Set1	Year_2016	Athens	Rep1	142	4	72	3382.68	40.54	20.19	46
G13-2484R2	Pop1	AU02-3104 x G00-3213(3)R2	Set1	Year_2016	Athens	Rep1	104	1	73	4021.55	39	20.31	48
G13-2486R2	Pop1	AU02-3104 x G00-3213(3)R2	Set1	Year_2016	Athens	Rep1	131	3	78	3375.95	39.01	20.78	46
G13-2489R2	Pop1	AU02-3104 x G00-3213(3)R2	Set1	Year_2016	Athens	Rep1	117	2	75	3853.43	40.17	19.96	43
G13-2547R2	Pop1	AU02-3104 x G00-3213(3)R2	Set1	Year_2016	Athens	Rep1	125	3	72	3779.45	40.88	19.25	48
G13-2559R2	Pop1	AU02-3104 x G00-3213(3)R2	Set1	Year_2016	Athens	Rep1	115	2	77	3241.45	40.33	20.29	49
G13-2587R2	Pop1	AU02-3104 x G00-3213(3)R2	Set1	Year_2016	Athens	Rep1	110	1	79	4149.32	40.3	20.7	48
G13-2605R2	Pop1	AU02-3104 x G00-3213(3)R2	Set1	Year_2016	Athens	Rep1	112	2	80	4250.2	40.02	19.6	48
G13-2606R2	Pop1	AU02-3104 x G00-3213(3)R2	Set1	Year_2016	Athens	Rep1	129	3	76	3389.4	37.73	20.92	46
G13-2608R2	Pop1	AU02-3104 x G00-3213(3)R2	Set1	Year_2016	Athens	Rep1	105	1	74	3671.85	38.21	20.27	46
G13-2611R2	Pop1	AU02-3104 x G00-3213(3)R2	Set1	Year_2016	Athens	Rep1	114	2	78	4115.7	38.05	20.46	50
G13-2613R2	Pop1	AU02-3104 x G00-3213(3)R2	Set1	Year_2016	Athens	Rep1	133	3	80	3194.38	38.11	20.83	47
G13-2617R2	Pop1	AU02-3104 x G00-3213(3)R2	Set1	Year_2016	Athens	Rep1	116	2	76	3786.18	39.15	21.13	48
G13-2618R2	Pop1	AU02-3104 x G00-3213(3)R2	Set1	Year_2016	Athens	Rep1	102	1	71	3379.31	38.53	19.45	49
G13-2636R2	Pop1	AU02-3104 x G00-3213(3)R2	Set1	Year_2016	Athens	Rep1	106	1	75	3154.03	37.3	20.43	46
G13-2648R2	Pop1	AU02-3104 x G00-3213(3)R2	Set1	Year_2016	Athens	Rep1	123	3	70	3752.55	41.09	19.41	46
G13-2680R2	Pop1	AU02-3104 x G00-3213(3)R2	Set1	Year_2016	Athens	Rep1	122	2	70	2895.11	41.32	18.5	48
G13-2682R2	Pop1	AU02-3104 x G00-3213(3)R2	Set1	Year_2016	Athens	Rep1	107	1	76	3564.25	39.94	20.33	46
G13-2685R2	Pop1	AU02-3104 x G00-3213(3)R2	Set1	Year_2016	Athens	Rep1	144	4	70	3705.47	40.76	19.94	47
G13-2692R2	Pop1	AU02-3104 x G00-3213(3)R2	Set1	Year_2016	Athens	Rep1	136	4	78	3369.22	39.3	21.61	46
G13-2693R2	Pop1	AU02-3104 x G00-3213(3)R2	Set1	Year_2016	Athens	Rep1	120	2	72	4458.68	41.07	20.23	46
G13-2696R2	Pop1	AU02-3104 x G00-3213(3)R2	Set1	Year_2016	Athens	Rep1	130	3	77	3530.62	39.13	20.8	47
G13-2699R2	Pop1	AU02-3104 x G00-3213(3)R2	Set1	Year_2016	Athens	Rep1	103	1	72	3349.05	39.46	20.54	47
AG6534	check	check	Set1	Year_2016	Athens	Rep2	213	6	79	3503.72	42.68	19.97	48
AG7733	check	check	Set1	Year_2016	Athens	Rep2	229	7	76	3537.35	42.18	19.07	53
G13-2314R2	Pop1	AU02-3104 x G00-3213(3)R2	Set1	Year_2016	Athens	Rep2	243	8	71	3120.4	42.28	20.19	50
G13-2315R2	Pop1	AU02-3104 x G00-3213(3)R2	Set1	Year_2016	Athens	Rep2	217	6	75	3497	41.46	21.49	46
G13-2335R2	Pop1	AU02-3104 x G00-3213(3)R2	Set1	Year_2016	Athens	Rep2	240	8	74	2898.47	41.9	20.19	53
G13-2346R2	Pop1	AU02-3104 x G00-3213(3)R2	Set1	Year_2016	Athens	Rep2	205	5	74	3550.8	41.48	20.21	46
G13-2350R2	Pop1	AU02-3104 x G00-3213(3)R2	Set1	Year_2016	Athens	Rep2	203	5	72	3396.12	40.44	19.52	49
G13-2351R2	Pop1	AU02-3104 x G00-3213(3)R2	Set1	Year_2016	Athens	Rep2	234	8	80	3342.32	40.85	20.58	47
G13-2361R2	Pop1	AU02-3104 x G00-3213(3)R2	Set1	Year_2016	Athens	Rep2	208	5	77	3584.43	40.98	20.54	51
G13-2377R2	Pop1	AU02-3104 x G00-3213(3)R2	Set1	Year_2016	Athens	Rep2	228	7	75	3490.28	43.23	20.33	48
G13-2378R2	Pop1	AU02-3104 x G00-3213(3)R2	Set1	Year_2016	Athens	Rep2	222	6	70	3248.18	42.35	20.16	51
G13-2390R2	Pop1	AU02-3104 x G00-3213(3)R2	Set1	Year_2016	Athens	Rep2	231	7	78	3147.3	41.13	20.64	51
G13-2405R2	Pop1	AU02-3104 x G00-3213(3)R2	Set1	Year_2016	Athens	Rep2	221	6	71	2999.35	39.73	20.37	48
G13-2412R2	Pop1	AU02-3104 x G00-3213(3)R2	Set1	Year_2016	Athens	Rep2	211	5	80	3692.03	40.16	20.37	48
G13-2435R2	Pop1	AU02-3104 x G00-3213(3)R2	Set1	Year_2016	Athens	Rep2	204	5	73	3564.25	39.97	20.71	46
G13-2449R2	Pop1	AU02-3104 x G00-3213(3)R2	Set1	Year_2016	Athens	Rep2	207	5	76	3463.38	39.86	19.92	51
G13-2451R2	Pop1	AU02-3104 x G00-3213(3)R2	Set1	Year_2016	Athens	Rep2	212	6	80	3913.95	41.41	20.22	47
G13-2454R2	Pop1	AU02-3104 x G00-3213(3)R2	Set1	Year_2016	Athens	Rep2	210	5	79	3866.88	39.72	20.7	51
G13-2469R2	Pop1	AU02-3104 x G00-3213(3)R2	Set1	Year_2016	Athens	Rep2	206	5	75	3685.3	39.49	20.23	50
G13-2471R2	Pop1	AU02-3104 x G00-3213(3)R2	Set1	Year_2016	Athens	Rep2	235	8	79	2891.75	41.2	20.95	46
G13-2473R2	Pop1	AU02-3104 x G00-3213(3)R2	Set1	Year_2016	Athens	Rep2	209	5	78	3927.4	39.5	20.16	50
G13-2476R2	Pop1	AU02-3104 x G00-3213(3)R2	Set1	Year_2016	Athens	Rep2	201	5	70	3940.85	41.07	20.32	46
G13-2484R2	Pop1	AU02-3104 x G00-3213(3)R2	Set1	Year_2016	Athens	Rep2	214	6	78	3409.57	40.83	19.74	51
G13-2486R2	Pop1	AU02-3104 x G00-3213(3)R2	Set1	Year_2016	Athens	Rep2	237	8	77	2831.22	42.81	19.85	46
G13-2489R2	Pop1	AU02-3104 x G00-3213(3)R2	Set1	Year_2016	Athens	Rep2	242	8	72	2777.43	42.69	19.8	45
G13-2547R2	Pop1	AU02-3104 x G00-3213(3)R2	Set1	Year_2016	Athens	Rep2	216	6	76	3241.45	41.69	20.38	50
G13-2559R2	Pop1	AU02-3104 x G00-3213(3)R2	Set1	Year_2016	Athens	Rep2	236	8	78	2851.4	42.17	20.62	46
G13-2587R2	Pop1	AU02-3104 x G00-3213(3)R2	Set1	Year_2016	Athens	Rep2	241	8	73	3100.22	42.83	20.79	50
G13-2605R2	Pop1	AU02-3104 x G00-3213(3)R2	Set1	Year_2016	Athens	Rep2	219	6	73	3328.88	42.08	19.31	49
G13-2606R2	Pop1	AU02-3104 x G00-3213(3)R2	Set1	Year_2016	Athens	Rep2	223	7	70	3207.82	38.95	20.99	48
G13-2608R2	Pop1	AU02-3104 x G00-3213(3)R2	Set1	Year_2016	Athens	Rep2	230	7	77	3718.93	40.51	19.75	48
G13-2611R2	Pop1	AU02-3104 x G00-3213(3)R2	Set1	Year_2016	Athens	Rep2	215	6	77	3638.22	40.58	19.81	50
G13-2613R2	Pop1	AU02-3104 x G00-3213(3)R2	Set1	Year_2016	Athens	Rep2	226	7	73	3248.18	40.49	20.19	49
G13-2617R2	Pop1	AU02-3104 x G00-3213(3)R2	Set1	Year_2016	Athens	Rep2	220	6	72	3584.43	40.93	20.84	48
G13-2618R2	Pop1	AU02-3104 x G00-3213(3)R2	Set1	Year_2016	Athens	Rep2	224	7	71	3523.9	41.2	20.33	49
G13-2636R2	Pop1	AU02-3104 x G00-3213(3)R2	Set1	Year_2016	Athens	Rep2	225	7	72	3140.57	39	20.02	48
G13-2648R2	Pop1	AU02-3104 x G00-3213(3)R2	Set1	Year_2016	Athens	Rep2	232	7	79	3799.62	39.91	20.99	52
G13-2680R2	Pop1	AU02-3104 x G00-3213(3)R2	Set1	Year_2016	Athens	Rep2	238	8	76	3120.4	42.26	19.07	49
G13-2682R2	Pop1	AU02-3104 x G00-3213(3)R2	Set1	Year_2016	Athens	Rep2	239	8	75	2918.65	41.35	21.05	46
G13-2685R2	Pop1	AU02-3104 x G00-3213(3)R2	Set1	Year_2016	Athens	Rep2	218	6	74	3315.43	41.26	19.8	49
G13-2692R2	Pop1	AU02-3104 x G00-3213(3)R2	Set1	Year_2016	Athens	Rep2	227	7	74	3113.68	40.61	21.24	46
G13-2693R2	Pop1	AU02-3104 x G00-3213(3)R2	Set1	Year_2016	Athens	Rep2	233	7	80	3853.43	41.72	20.64	50
G13-2696R2	Pop1	AU02-3104 x G00-3213(3)R2	Set1	Year_2016	Athens	Rep2	202	5	71	3685.3	40.25	21	49
G13-2699R2	Pop1	AU02-3104 x G00-3213(3)R2	Set1	Year_2016	Athens	Rep2	244	8	70	2696.72	41.05	20.92	48
AG6534	check	check	Set1	Year_2016	Athens	Rep3	305	9	74	2891.75	43.77	19.17	48
AG7733	check	check	Set1	Year_2016	Athens	Rep3	316	10	76	3039.7	42.32	19.11	54
G13-2314R2	Pop1	AU02-3104 x G00-3213(3)R2	Set1	Year_2016	Athens	Rep3	329	11	76	3012.8	41.97	20.08	53
G13-2315R2	Pop1	AU02-3104 x G00-3213(3)R2	Set1	Year_2016	Athens	Rep3	322	10	70	3140.57	41.51	21.23	46
G13-2335R2	Pop1	AU02-3104 x G00-3213(3)R2	Set1	Year_2016	Athens	Rep3	338	12	76	2784.15	42.08	19.54	53
G13-2346R2	Pop1	AU02-3104 x G00-3213(3)R2	Set1	Year_2016	Athens	Rep3	302	9	71	3207.82	41.07	20.38	46
G13-2350R2	Pop1	AU02-3104 x G00-3213(3)R2	Set1	Year_2016	Athens	Rep3	333	11	80	3180.93	41.61	19.39	48
G13-2351R2	Pop1	AU02-3104 x G00-3213(3)R2	Set1	Year_2016	Athens	Rep3	337	12	77	2710.18	40.76	20.38	50
G13-2361R2	Pop1	AU02-3104 x G00-3213(3)R2	Set1	Year_2016	Athens	Rep3	342	12	72	3073.32	41.96	19.52	50
G13-2377R2	Pop1	AU02-3104 x G00-3213(3)R2	Set1	Year_2016	Athens	Rep3	314	10	78	2777.43	43.57	20.05	50
G13-2378R2	Pop1	AU02-3104 x G00-3213(3)R2	Set1	Year_2016	Athens	Rep3	311	9	80	3685.3	41.76	19.75	52
G13-2390R2	Pop1	AU02-3104 x G00-3213(3)R2	Set1	Year_2016	Athens	Rep3	339	12	75	2676.55	41.55	19.8	50
G13-2405R2	Pop1	AU02-3104 x G00-3213(3)R2	Set1	Year_2016	Athens	Rep3	341	12	73	2804.32	40.55	19.93	50
G13-2412R2	Pop1	AU02-3104 x G00-3213(3)R2	Set1	Year_2016	Athens	Rep3	309	9	78	3712.2	40.17	21.27	49
G13-2435R2	Pop1	AU02-3104 x G00-3213(3)R2	Set1	Year_2016	Athens	Rep3	325	11	72	2945.55	41.83	20.85	46
G13-2449R2	Pop1	AU02-3104 x G00-3213(3)R2	Set1	Year_2016	Athens	Rep3	343	12	71	2985.9	40.87	19.54	49
G13-2451R2	Pop1	AU02-3104 x G00-3213(3)R2	Set1	Year_2016	Athens	Rep3	323	11	70	2851.4	41.8	20.62	49
G13-2454R2	Pop1	AU02-3104 x G00-3213(3)R2	Set1	Year_2016	Athens	Rep3	327	11	74	2891.75	40.87	20.79	50
G13-2469R2	Pop1	AU02-3104 x G00-3213(3)R2	Set1	Year_2016	Athens	Rep3	336	12	78	2723.62	40.54	19.87	54
G13-2471R2	Pop1	AU02-3104 x G00-3213(3)R2	Set1	Year_2016	Athens	Rep3	332	11	79	2911.93	42.56	20.07	47
G13-2473R2	Pop1	AU02-3104 x G00-3213(3)R2	Set1	Year_2016	Athens	Rep3	312	10	80	3127.12	41.4	19.61	50
G13-2476R2	Pop1	AU02-3104 x G00-3213(3)R2	Set1	Year_2016	Athens	Rep3	331	11	78	2743.8	42.74	19.7	49
G13-2484R2	Pop1	AU02-3104 x G00-3213(3)R2	Set1	Year_2016	Athens	Rep3	334	12	80	2844.68	39.64	20.41	54
G13-2486R2	Pop1	AU02-3104 x G00-3213(3)R2	Set1	Year_2016	Athens	Rep3	319	10	73	2979.18	42	20.99	48
G13-2489R2	Pop1	AU02-3104 x G00-3213(3)R2	Set1	Year_2016	Athens	Rep3	324	11	71	2905.2	43.15	18.93	43
G13-2547R2	Pop1	AU02-3104 x G00-3213(3)R2	Set1	Year_2016	Athens	Rep3	321	10	71	2690	41.78	20.39	48
G13-2559R2	Pop1	AU02-3104 x G00-3213(3)R2	Set1	Year_2016	Athens	Rep3	307	9	76	2972.45	40.56	20.89	50
G13-2587R2	Pop1	AU02-3104 x G00-3213(3)R2	Set1	Year_2016	Athens	Rep3	308	9	77	3342.32	40.75	21.98	53
G13-2605R2	Pop1	AU02-3104 x G00-3213(3)R2	Set1	Year_2016	Athens	Rep3	340	12	74	2938.82	41.31	19.75	50
G13-2606R2	Pop1	AU02-3104 x G00-3213(3)R2	Set1	Year_2016	Athens	Rep3	301	9	70	3436.47	38.31	20.71	48
G13-2608R2	Pop1	AU02-3104 x G00-3213(3)R2	Set1	Year_2016	Athens	Rep3	306	9	75	2992.62	40.22	20.61	47
G13-2611R2	Pop1	AU02-3104 x G00-3213(3)R2	Set1	Year_2016	Athens	Rep3	317	10	75	3100.22	39.72	20.36	50
G13-2613R2	Pop1	AU02-3104 x G00-3213(3)R2	Set1	Year_2016	Athens	Rep3	303	9	72	3463.38	40.03	20.34	53
G13-2617R2	Pop1	AU02-3104 x G00-3213(3)R2	Set1	Year_2016	Athens	Rep3	326	11	73	2965.72	41.23	20.86	48
G13-2618R2	Pop1	AU02-3104 x G00-3213(3)R2	Set1	Year_2016	Athens	Rep3	313	10	79	3234.72	41.02	20.47	53
G13-2636R2	Pop1	AU02-3104 x G00-3213(3)R2	Set1	Year_2016	Athens	Rep3	304	9	73	3167.47	38.61	20.62	50
G13-2648R2	Pop1	AU02-3104 x G00-3213(3)R2	Set1	Year_2016	Athens	Rep3	330	11	77	2824.5	40.81	20.35	54
G13-2680R2	Pop1	AU02-3104 x G00-3213(3)R2	Set1	Year_2016	Athens	Rep3	328	11	75	2669.82	42.32	18.99	51
G13-2682R2	Pop1	AU02-3104 x G00-3213(3)R2	Set1	Year_2016	Athens	Rep3	318	10	74	3369.22	40.51	21.79	46
G13-2685R2	Pop1	AU02-3104 x G00-3213(3)R2	Set1	Year_2016	Athens	Rep3	315	10	77	2979.18	40.65	19.98	51
G13-2692R2	Pop1	AU02-3104 x G00-3213(3)R2	Set1	Year_2016	Athens	Rep3	320	10	72	2985.9	40.93	21.29	47
G13-2693R2	Pop1	AU02-3104 x G00-3213(3)R2	Set1	Year_2016	Athens	Rep3	335	12	79	3550.8	42.42	20.42	54
G13-2696R2	Pop1	AU02-3104 x G00-3213(3)R2	Set1	Year_2016	Athens	Rep3	344	12	70	2831.22	40.11	20.71	47
G13-2699R2	Pop1	AU02-3104 x G00-3213(3)R2	Set1	Year_2016	Athens	Rep3	310	9	79	3295.25	40.23	21	52
AG7733	check	check	Set2	Year_2016	Athens	Rep1	114	14	78	2911.93	42.57	19.43	50
AG7934	check	check	Set2	Year_2016	Athens	Rep1	134	16	80	2878.3	42.99	19.95	52
G13-2304R2	Pop1	AU02-3104 x G00-3213(3)R2	Set2	Year_2016	Athens	Rep1	104	13	73	2737.07	41.89	19.38	51
G13-2307R2	Pop1	AU02-3104 x G00-3213(3)R2	Set2	Year_2016	Athens	Rep1	122	14	70	2965.72	41.48	19.63	55
G13-2312R2	Pop1	AU02-3104 x G00-3213(3)R2	Set2	Year_2016	Athens	Rep1	139	16	75	3100.22	40.94	21.34	47
G13-2322R2	Pop1	AU02-3104 x G00-3213(3)R2	Set2	Year_2016	Athens	Rep1	127	15	74	3301.97	41.24	20.53	51
G13-2324R2	Pop1	AU02-3104 x G00-3213(3)R2	Set2	Year_2016	Athens	Rep1	103	13	72	2669.82	42.83	18.92	48
G13-2353R2	Pop1	AU02-3104 x G00-3213(3)R2	Set2	Year_2016	Athens	Rep1	129	15	76	3537.35	39.43	21.4	50
G13-2355R2	Pop1	AU02-3104 x G00-3213(3)R2	Set2	Year_2016	Athens	Rep1	142	16	72	3322.15	41.65	20.36	53
G13-2366R2	Pop1	AU02-3104 x G00-3213(3)R2	Set2	Year_2016	Athens	Rep1	131	15	78	3409.57	42.22	21.03	51
G13-2368R2	Pop1	AU02-3104 x G00-3213(3)R2	Set2	Year_2016	Athens	Rep1	128	15	75	3335.6	42.77	19.85	51
G13-2372R2	Pop1	AU02-3104 x G00-3213(3)R2	Set2	Year_2016	Athens	Rep1	119	14	73	3120.4	42.54	20.84	47
G13-2375R2	Pop1	AU02-3104 x G00-3213(3)R2	Set2	Year_2016	Athens	Rep1	126	15	73	3416.3	42.6	20.13	52
G13-2376R2	Pop1	AU02-3104 x G00-3213(3)R2	Set2	Year_2016	Athens	Rep1	123	15	70	3154.03	39.19	20.83	52
G13-2379R2	Pop1	AU02-3104 x G00-3213(3)R2	Set2	Year_2016	Athens	Rep1	108	13	77	3147.3	42.48	19.19	54
G13-2384R2	Pop1	AU02-3104 x G00-3213(3)R2	Set2	Year_2016	Athens	Rep1	137	16	77	2985.9	40.39	20.4	47
G13-2385R2	Pop1	AU02-3104 x G00-3213(3)R2	Set2	Year_2016	Athens	Rep1	135	16	79	2891.75	41.27	20.36	50
G13-2387R2	Pop1	AU02-3104 x G00-3213(3)R2	Set2	Year_2016	Athens	Rep1	117	14	75	2824.5	43.84	19.27	50
G13-2389R2	Pop1	AU02-3104 x G00-3213(3)R2	Set2	Year_2016	Athens	Rep1	121	14	71	2911.93	42.8	20.97	52
G13-2394R2	Pop1	AU02-3104 x G00-3213(3)R2	Set2	Year_2016	Athens	Rep1	124	15	71	3544.07	41.01	20.01	51
G13-2400R2	Pop1	AU02-3104 x G00-3213(3)R2	Set2	Year_2016	Athens	Rep1	118	14	74	3053.15	40.95	20.12	53
G13-2401R2	Pop1	AU02-3104 x G00-3213(3)R2	Set2	Year_2016	Athens	Rep1	143	16	71	3369.22	41.15	20.9	46
G13-2407R2	Pop1	AU02-3104 x G00-3213(3)R2	Set2	Year_2016	Athens	Rep1	144	16	70	3806.35	38.64	21.49	46
G13-2414R2	Pop1	AU02-3104 x G00-3213(3)R2	Set2	Year_2016	Athens	Rep1	107	13	76	2871.57	42.88	19.51	53
G13-2418R2	Pop1	AU02-3104 x G00-3213(3)R2	Set2	Year_2016	Athens	Rep1	101	13	70	2918.65	40.85	20.28	48
G13-2421R2	Pop1	AU02-3104 x G00-3213(3)R2	Set2	Year_2016	Athens	Rep1	120	14	72	3106.95	43.13	19.98	50
G13-2453R2	Pop1	AU02-3104 x G00-3213(3)R2	Set2	Year_2016	Athens	Rep1	138	16	76	3086.78	40.62	20.35	49
G13-2463R2	Pop1	AU02-3104 x G00-3213(3)R2	Set2	Year_2016	Athens	Rep1	106	13	75	2414.28	41.76	20.35	54
G13-2529R2	Pop1	AU02-3104 x G00-3213(3)R2	Set2	Year_2016	Athens	Rep1	113	14	79	2878.3	40.14	20.47	54
G13-2532R2	Pop1	AU02-3104 x G00-3213(3)R2	Set2	Year_2016	Athens	Rep1	102	13	71	2938.82	38.45	22.05	40
G13-2533R2	Pop1	AU02-3104 x G00-3213(3)R2	Set2	Year_2016	Athens	Rep1	109	13	78	2945.55	41.26	20.55	47
G13-2534R2	Pop1	AU02-3104 x G00-3213(3)R2	Set2	Year_2016	Athens	Rep1	110	13	79	3154.03	41.82	20.51	53
G13-2536R2	Pop1	AU02-3104 x G00-3213(3)R2	Set2	Year_2016	Athens	Rep1	141	16	73	3012.8	41.1	21.7	40
G13-2551R2	Pop1	AU02-3104 x G00-3213(3)R2	Set2	Year_2016	Athens	Rep1	133	15	80	3234.72	41.98	20.79	54
G13-2579R2	Pop1	AU02-3104 x G00-3213(3)R2	Set2	Year_2016	Athens	Rep1	105	13	74	2905.2	43.22	20.24	52
G13-2596R2	Pop1	AU02-3104 x G00-3213(3)R2	Set2	Year_2016	Athens	Rep1	140	16	74	3160.75	42.36	20.31	50
G13-2607R2	Pop1	AU02-3104 x G00-3213(3)R2	Set2	Year_2016	Athens	Rep1	112	14	80	3201.1	40.23	20.77	54
G13-2649R2	Pop1	AU02-3104 x G00-3213(3)R2	Set2	Year_2016	Athens	Rep1	136	16	78	2932.1	40.55	21.12	45
G13-2650R2	Pop1	AU02-3104 x G00-3213(3)R2	Set2	Year_2016	Athens	Rep1	111	13	80	3362.5	41.61	20.51	54
G13-2671R2	Pop1	AU02-3104 x G00-3213(3)R2	Set2	Year_2016	Athens	Rep1	125	15	72	3483.55	39.72	20.17	52
G13-2672R2	Pop1	AU02-3104 x G00-3213(3)R2	Set2	Year_2016	Athens	Rep1	130	15	77	3510.45	39.57	21.68	51
G13-2673R2	Pop1	AU02-3104 x G00-3213(3)R2	Set2	Year_2016	Athens	Rep1	132	15	79	3396.12	39.93	20.6	51
G13-2679R2	Pop1	AU02-3104 x G00-3213(3)R2	Set2	Year_2016	Athens	Rep1	116	14	76	3059.88	42.16	20.8	49
G13-2686R2	Pop1	AU02-3104 x G00-3213(3)R2	Set2	Year_2016	Athens	Rep1	115	14	77	3228	42.85	19.53	49
AG7733	check	check	Set2	Year_2016	Athens	Rep2	227	19	74	3288.53	41.78	19.19	50
AG7934	check	check	Set2	Year_2016	Athens	Rep2	230	19	77	2844.68	43.22	20.05	51
G13-2304R2	Pop1	AU02-3104 x G00-3213(3)R2	Set2	Year_2016	Athens	Rep2	207	17	76	3127.12	40.39	20.2	48
G13-2307R2	Pop1	AU02-3104 x G00-3213(3)R2	Set2	Year_2016	Athens	Rep2	234	20	80	3241.45	40.8	19.33	55
G13-2312R2	Pop1	AU02-3104 x G00-3213(3)R2	Set2	Year_2016	Athens	Rep2	244	20	70	3873.6	40.68	21.08	49
G13-2322R2	Pop1	AU02-3104 x G00-3213(3)R2	Set2	Year_2016	Athens	Rep2	201	17	70	3113.68	41.67	20.06	51
G13-2324R2	Pop1	AU02-3104 x G00-3213(3)R2	Set2	Year_2016	Athens	Rep2	243	20	71	3288.53	40.07	19.2	49
G13-2353R2	Pop1	AU02-3104 x G00-3213(3)R2	Set2	Year_2016	Athens	Rep2	239	20	75	3167.47	40.31	19.98	53
G13-2355R2	Pop1	AU02-3104 x G00-3213(3)R2	Set2	Year_2016	Athens	Rep2	240	20	74	3342.32	40.89	20.83	54
G13-2366R2	Pop1	AU02-3104 x G00-3213(3)R2	Set2	Year_2016	Athens	Rep2	222	18	70	3201.1	42.99	20.33	51
G13-2368R2	Pop1	AU02-3104 x G00-3213(3)R2	Set2	Year_2016	Athens	Rep2	231	19	78	2858.12	43.3	19.16	53
G13-2372R2	Pop1	AU02-3104 x G00-3213(3)R2	Set2	Year_2016	Athens	Rep2	216	18	76	3154.03	43.11	19.72	47
G13-2375R2	Pop1	AU02-3104 x G00-3213(3)R2	Set2	Year_2016	Athens	Rep2	211	17	80	3120.4	43.22	19.8	50
G13-2376R2	Pop1	AU02-3104 x G00-3213(3)R2	Set2	Year_2016	Athens	Rep2	217	18	75	2878.3	40.8	19.47	49
G13-2379R2	Pop1	AU02-3104 x G00-3213(3)R2	Set2	Year_2016	Athens	Rep2	220	18	72	3349.05	40.56	20.8	51
G13-2384R2	Pop1	AU02-3104 x G00-3213(3)R2	Set2	Year_2016	Athens	Rep2	235	20	79	2844.68	41.37	19.8	47
G13-2385R2	Pop1	AU02-3104 x G00-3213(3)R2	Set2	Year_2016	Athens	Rep2	221	18	71	3140.57	39.26	21.72	50
G13-2387R2	Pop1	AU02-3104 x G00-3213(3)R2	Set2	Year_2016	Athens	Rep2	206	17	75	2851.4	42.25	19.8	50
G13-2389R2	Pop1	AU02-3104 x G00-3213(3)R2	Set2	Year_2016	Athens	Rep2	225	19	72	3416.3	40.6	21.3	51
G13-2394R2	Pop1	AU02-3104 x G00-3213(3)R2	Set2	Year_2016	Athens	Rep2	236	20	78	3066.6	41.34	19.21	53
G13-2400R2	Pop1	AU02-3104 x G00-3213(3)R2	Set2	Year_2016	Athens	Rep2	229	19	76	3174.2	40.35	20.28	54
G13-2401R2	Pop1	AU02-3104 x G00-3213(3)R2	Set2	Year_2016	Athens	Rep2	213	18	79	2790.88	40.99	20.61	46
G13-2407R2	Pop1	AU02-3104 x G00-3213(3)R2	Set2	Year_2016	Athens	Rep2	209	17	78	2851.4	40.01	21	48
G13-2414R2	Pop1	AU02-3104 x G00-3213(3)R2	Set2	Year_2016	Athens	Rep2	242	20	72	4001.38	41.48	19.97	52
G13-2418R2	Pop1	AU02-3104 x G00-3213(3)R2	Set2	Year_2016	Athens	Rep2	224	19	71	3100.22	40.22	20.27	50
G13-2421R2	Pop1	AU02-3104 x G00-3213(3)R2	Set2	Year_2016	Athens	Rep2	214	18	78	3073.32	41.99	20.16	50
G13-2453R2	Pop1	AU02-3104 x G00-3213(3)R2	Set2	Year_2016	Athens	Rep2	202	17	71	3396.12	39.59	20.79	51
G13-2463R2	Pop1	AU02-3104 x G00-3213(3)R2	Set2	Year_2016	Athens	Rep2	210	17	79	3254.9	41.03	20.12	54
G13-2529R2	Pop1	AU02-3104 x G00-3213(3)R2	Set2	Year_2016	Athens	Rep2	203	17	72	3201.1	39.97	20.27	53
G13-2532R2	Pop1	AU02-3104 x G00-3213(3)R2	Set2	Year_2016	Athens	Rep2	233	19	80	2911.93	39.92	21.23	48
G13-2533R2	Pop1	AU02-3104 x G00-3213(3)R2	Set2	Year_2016	Athens	Rep2	218	18	74	2932.1	39.9	21.56	45
G13-2534R2	Pop1	AU02-3104 x G00-3213(3)R2	Set2	Year_2016	Athens	Rep2	212	18	80	3180.93	41.5	20.95	47
G13-2536R2	Pop1	AU02-3104 x G00-3213(3)R2	Set2	Year_2016	Athens	Rep2	215	18	77	2864.85	40.6	21.62	46
G13-2551R2	Pop1	AU02-3104 x G00-3213(3)R2	Set2	Year_2016	Athens	Rep2	232	19	79	2864.85	43.17	20.02	51
G13-2579R2	Pop1	AU02-3104 x G00-3213(3)R2	Set2	Year_2016	Athens	Rep2	204	17	73	3369.22	42.03	20.84	50
G13-2596R2	Pop1	AU02-3104 x G00-3213(3)R2	Set2	Year_2016	Athens	Rep2	219	18	73	3147.3	41.55	20.65	49
G13-2607R2	Pop1	AU02-3104 x G00-3213(3)R2	Set2	Year_2016	Athens	Rep2	208	17	77	3248.18	40.54	19.75	54
G13-2649R2	Pop1	AU02-3104 x G00-3213(3)R2	Set2	Year_2016	Athens	Rep2	241	20	73	3268.35	39.99	21.16	48
G13-2650R2	Pop1	AU02-3104 x G00-3213(3)R2	Set2	Year_2016	Athens	Rep2	228	19	75	3443.2	40.61	20.79	53
G13-2671R2	Pop1	AU02-3104 x G00-3213(3)R2	Set2	Year_2016	Athens	Rep2	205	17	74	3100.22	39.24	20.77	50
G13-2672R2	Pop1	AU02-3104 x G00-3213(3)R2	Set2	Year_2016	Athens	Rep2	226	19	73	3228	39.46	21.52	49
G13-2673R2	Pop1	AU02-3104 x G00-3213(3)R2	Set2	Year_2016	Athens	Rep2	237	20	77	2945.55	41.33	19.35	53
G13-2679R2	Pop1	AU02-3104 x G00-3213(3)R2	Set2	Year_2016	Athens	Rep2	238	20	76	3342.32	41.93	20.61	50
G13-2686R2	Pop1	AU02-3104 x G00-3213(3)R2	Set2	Year_2016	Athens	Rep2	223	19	70	3497	41.2	20.48	50
AG7733	check	check	Set2	Year_2016	Athens	Rep3	344	24	70	3241.45	42.09	19.49	51
AG7934	check	check	Set2	Year_2016	Athens	Rep3	343	24	71	3322.15	41.87	20.01	54
G13-2304R2	Pop1	AU02-3104 x G00-3213(3)R2	Set2	Year_2016	Athens	Rep3	307	21	76	3066.6	41.11	19.81	50
G13-2307R2	Pop1	AU02-3104 x G00-3213(3)R2	Set2	Year_2016	Athens	Rep3	342	24	72	3301.97	40.98	19.56	55
G13-2312R2	Pop1	AU02-3104 x G00-3213(3)R2	Set2	Year_2016	Athens	Rep3	326	23	73	3745.82	40.2	21.02	49
G13-2322R2	Pop1	AU02-3104 x G00-3213(3)R2	Set2	Year_2016	Athens	Rep3	335	24	79	3295.25	41.4	19.68	50
G13-2324R2	Pop1	AU02-3104 x G00-3213(3)R2	Set2	Year_2016	Athens	Rep3	312	22	80	2938.82	40.13	19.87	47
G13-2353R2	Pop1	AU02-3104 x G00-3213(3)R2	Set2	Year_2016	Athens	Rep3	301	21	70	3349.05	40.26	20.71	50
G13-2355R2	Pop1	AU02-3104 x G00-3213(3)R2	Set2	Year_2016	Athens	Rep3	321	22	71	3671.85	41.6	20	54
G13-2366R2	Pop1	AU02-3104 x G00-3213(3)R2	Set2	Year_2016	Athens	Rep3	322	22	70	3510.45	42.51	21.08	51
G13-2368R2	Pop1	AU02-3104 x G00-3213(3)R2	Set2	Year_2016	Athens	Rep3	304	21	73	3618.05	42.67	19.39	54
G13-2372R2	Pop1	AU02-3104 x G00-3213(3)R2	Set2	Year_2016	Athens	Rep3	318	22	74	3275.07	42.37	20.23	49
G13-2375R2	Pop1	AU02-3104 x G00-3213(3)R2	Set2	Year_2016	Athens	Rep3	305	21	74	3402.85	44.39	19.5	50
G13-2376R2	Pop1	AU02-3104 x G00-3213(3)R2	Set2	Year_2016	Athens	Rep3	333	23	80	3066.6	39.6	20.58	47
G13-2379R2	Pop1	AU02-3104 x G00-3213(3)R2	Set2	Year_2016	Athens	Rep3	316	22	76	3268.35	41.03	20.92	51
G13-2384R2	Pop1	AU02-3104 x G00-3213(3)R2	Set2	Year_2016	Athens	Rep3	311	21	80	3006.07	41.25	20.07	47
G13-2385R2	Pop1	AU02-3104 x G00-3213(3)R2	Set2	Year_2016	Athens	Rep3	341	24	73	3080.05	41.51	20.46	51
G13-2387R2	Pop1	AU02-3104 x G00-3213(3)R2	Set2	Year_2016	Athens	Rep3	313	22	79	3167.47	40.91	19.94	49
G13-2389R2	Pop1	AU02-3104 x G00-3213(3)R2	Set2	Year_2016	Athens	Rep3	310	21	79	3241.45	41.27	20.93	51
G13-2394R2	Pop1	AU02-3104 x G00-3213(3)R2	Set2	Year_2016	Athens	Rep3	308	21	77	3375.95	42.57	19.62	49
G13-2400R2	Pop1	AU02-3104 x G00-3213(3)R2	Set2	Year_2016	Athens	Rep3	324	23	71	3503.72	39.8	20.16	54
G13-2401R2	Pop1	AU02-3104 x G00-3213(3)R2	Set2	Year_2016	Athens	Rep3	331	23	78	3006.07	41.12	20.64	47
G13-2407R2	Pop1	AU02-3104 x G00-3213(3)R2	Set2	Year_2016	Athens	Rep3	340	24	74	3483.55	39.82	20.98	51
G13-2414R2	Pop1	AU02-3104 x G00-3213(3)R2	Set2	Year_2016	Athens	Rep3	332	23	79	3382.68	42.01	19.96	51
G13-2418R2	Pop1	AU02-3104 x G00-3213(3)R2	Set2	Year_2016	Athens	Rep3	309	21	78	2790.88	41.9	19.49	47
G13-2421R2	Pop1	AU02-3104 x G00-3213(3)R2	Set2	Year_2016	Athens	Rep3	306	21	75	2844.68	43.86	18.8	50
G13-2453R2	Pop1	AU02-3104 x G00-3213(3)R2	Set2	Year_2016	Athens	Rep3	320	22	72	3201.1	41.11	20.11	50
G13-2463R2	Pop1	AU02-3104 x G00-3213(3)R2	Set2	Year_2016	Athens	Rep3	319	22	73	2891.75	40.37	20.68	54
G13-2529R2	Pop1	AU02-3104 x G00-3213(3)R2	Set2	Year_2016	Athens	Rep3	327	23	74	3436.47	40.17	20.03	55
G13-2532R2	Pop1	AU02-3104 x G00-3213(3)R2	Set2	Year_2016	Athens	Rep3	323	23	70	3523.9	39.52	21.58	48
G13-2533R2	Pop1	AU02-3104 x G00-3213(3)R2	Set2	Year_2016	Athens	Rep3	314	22	78	3483.55	39.68	21.49	46
G13-2534R2	Pop1	AU02-3104 x G00-3213(3)R2	Set2	Year_2016	Athens	Rep3	329	23	76	3147.3	40.9	21.22	47
G13-2536R2	Pop1	AU02-3104 x G00-3213(3)R2	Set2	Year_2016	Athens	Rep3	325	23	72	3301.97	39.34	22.08	47
G13-2551R2	Pop1	AU02-3104 x G00-3213(3)R2	Set2	Year_2016	Athens	Rep3	338	24	76	3180.93	41.99	20.48	53
G13-2579R2	Pop1	AU02-3104 x G00-3213(3)R2	Set2	Year_2016	Athens	Rep3	315	22	77	3315.43	41.03	21	48
G13-2596R2	Pop1	AU02-3104 x G00-3213(3)R2	Set2	Year_2016	Athens	Rep3	337	24	77	3288.53	42.11	20.6	52
G13-2607R2	Pop1	AU02-3104 x G00-3213(3)R2	Set2	Year_2016	Athens	Rep3	317	22	75	3221.28	39.2	20.86	54
G13-2649R2	Pop1	AU02-3104 x G00-3213(3)R2	Set2	Year_2016	Athens	Rep3	302	21	71	3584.43	40.88	20.75	48
G13-2650R2	Pop1	AU02-3104 x G00-3213(3)R2	Set2	Year_2016	Athens	Rep3	336	24	78	3194.38	41.02	21.03	51
G13-2671R2	Pop1	AU02-3104 x G00-3213(3)R2	Set2	Year_2016	Athens	Rep3	328	23	75	3006.07	39.88	20.05	51
G13-2672R2	Pop1	AU02-3104 x G00-3213(3)R2	Set2	Year_2016	Athens	Rep3	334	24	80	3275.07	40.16	20.96	49
G13-2673R2	Pop1	AU02-3104 x G00-3213(3)R2	Set2	Year_2016	Athens	Rep3	303	21	72	3497	40.98	19.36	48
G13-2679R2	Pop1	AU02-3104 x G00-3213(3)R2	Set2	Year_2016	Athens	Rep3	339	24	75	3241.45	40.83	21	51
G13-2686R2	Pop1	AU02-3104 x G00-3213(3)R2	Set2	Year_2016	Athens	Rep3	330	23	77	3712.2	42.58	19.6	48
AG6534	check	check	Set1	Year_2014	Plains	Rep1	102	17	47	3718.93	NA	NA	NA
AG7733	check	check	Set1	Year_2014	Plains	Rep1	144	20	46	4458.68	NA	NA	NA
G13-2314R2	Pop1	AU02-3104 x G00-3213(3)R2	Set1	Year_2014	Plains	Rep1	132	19	55	3254.9	NA	NA	NA
G13-2315R2	Pop1	AU02-3104 x G00-3213(3)R2	Set1	Year_2014	Plains	Rep1	108	17	53	3550.8	NA	NA	NA
G13-2335R2	Pop1	AU02-3104 x G00-3213(3)R2	Set1	Year_2014	Plains	Rep1	122	18	46	3994.65	NA	NA	NA
G13-2346R2	Pop1	AU02-3104 x G00-3213(3)R2	Set1	Year_2014	Plains	Rep1	128	19	51	3564.25	NA	NA	NA
G13-2350R2	Pop1	AU02-3104 x G00-3213(3)R2	Set1	Year_2014	Plains	Rep1	103	17	48	3974.47	NA	NA	NA
G13-2351R2	Pop1	AU02-3104 x G00-3213(3)R2	Set1	Year_2014	Plains	Rep1	105	17	50	3934.12	NA	NA	NA
G13-2361R2	Pop1	AU02-3104 x G00-3213(3)R2	Set1	Year_2014	Plains	Rep1	123	19	46	3692.03	NA	NA	NA
G13-2377R2	Pop1	AU02-3104 x G00-3213(3)R2	Set1	Year_2014	Plains	Rep1	101	17	46	4573	NA	NA	NA
G13-2378R2	Pop1	AU02-3104 x G00-3213(3)R2	Set1	Year_2014	Plains	Rep1	124	19	47	4095.53	NA	NA	NA
G13-2390R2	Pop1	AU02-3104 x G00-3213(3)R2	Set1	Year_2014	Plains	Rep1	117	18	51	3577.7	NA	NA	NA
G13-2405R2	Pop1	AU02-3104 x G00-3213(3)R2	Set1	Year_2014	Plains	Rep1	112	18	56	4068.62	NA	NA	NA
G13-2412R2	Pop1	AU02-3104 x G00-3213(3)R2	Set1	Year_2014	Plains	Rep1	141	20	49	3497	NA	NA	NA
G13-2435R2	Pop1	AU02-3104 x G00-3213(3)R2	Set1	Year_2014	Plains	Rep1	107	17	52	3322.15	NA	NA	NA
G13-2449R2	Pop1	AU02-3104 x G00-3213(3)R2	Set1	Year_2014	Plains	Rep1	125	19	48	3429.75	NA	NA	NA
G13-2451R2	Pop1	AU02-3104 x G00-3213(3)R2	Set1	Year_2014	Plains	Rep1	110	17	55	3369.22	NA	NA	NA
G13-2454R2	Pop1	AU02-3104 x G00-3213(3)R2	Set1	Year_2014	Plains	Rep1	137	20	53	4707.5	NA	NA	NA
G13-2469R2	Pop1	AU02-3104 x G00-3213(3)R2	Set1	Year_2014	Plains	Rep1	136	20	54	3349.05	NA	NA	NA
G13-2471R2	Pop1	AU02-3104 x G00-3213(3)R2	Set1	Year_2014	Plains	Rep1	140	20	50	3866.88	NA	NA	NA
G13-2473R2	Pop1	AU02-3104 x G00-3213(3)R2	Set1	Year_2014	Plains	Rep1	139	20	51	4108.98	NA	NA	NA
G13-2476R2	Pop1	AU02-3104 x G00-3213(3)R2	Set1	Year_2014	Plains	Rep1	126	19	49	3416.3	NA	NA	NA
G13-2484R2	Pop1	AU02-3104 x G00-3213(3)R2	Set1	Year_2014	Plains	Rep1	119	18	49	4277.1	NA	NA	NA
G13-2486R2	Pop1	AU02-3104 x G00-3213(3)R2	Set1	Year_2014	Plains	Rep1	138	20	52	3248.18	NA	NA	NA
G13-2489R2	Pop1	AU02-3104 x G00-3213(3)R2	Set1	Year_2014	Plains	Rep1	120	18	48	3322.15	NA	NA	NA
G13-2547R2	Pop1	AU02-3104 x G00-3213(3)R2	Set1	Year_2014	Plains	Rep1	134	20	56	3631.5	NA	NA	NA
G13-2559R2	Pop1	AU02-3104 x G00-3213(3)R2	Set1	Year_2014	Plains	Rep1	133	19	56	3665.12	NA	NA	NA
G13-2587R2	Pop1	AU02-3104 x G00-3213(3)R2	Set1	Year_2014	Plains	Rep1	113	18	55	3550.8	NA	NA	NA
G13-2605R2	Pop1	AU02-3104 x G00-3213(3)R2	Set1	Year_2014	Plains	Rep1	118	18	50	3799.62	NA	NA	NA
G13-2606R2	Pop1	AU02-3104 x G00-3213(3)R2	Set1	Year_2014	Plains	Rep1	127	19	50	4364.52	NA	NA	NA
G13-2608R2	Pop1	AU02-3104 x G00-3213(3)R2	Set1	Year_2014	Plains	Rep1	129	19	52	3080.05	NA	NA	NA
G13-2611R2	Pop1	AU02-3104 x G00-3213(3)R2	Set1	Year_2014	Plains	Rep1	106	17	51	4330.9	NA	NA	NA
G13-2613R2	Pop1	AU02-3104 x G00-3213(3)R2	Set1	Year_2014	Plains	Rep1	115	18	53	3570.97	NA	NA	NA
G13-2617R2	Pop1	AU02-3104 x G00-3213(3)R2	Set1	Year_2014	Plains	Rep1	116	18	52	3470.1	NA	NA	NA
G13-2618R2	Pop1	AU02-3104 x G00-3213(3)R2	Set1	Year_2014	Plains	Rep1	121	18	47	4095.53	NA	NA	NA
G13-2636R2	Pop1	AU02-3104 x G00-3213(3)R2	Set1	Year_2014	Plains	Rep1	111	17	56	4001.38	NA	NA	NA
G13-2648R2	Pop1	AU02-3104 x G00-3213(3)R2	Set1	Year_2014	Plains	Rep1	109	17	54	3712.2	NA	NA	NA
G13-2680R2	Pop1	AU02-3104 x G00-3213(3)R2	Set1	Year_2014	Plains	Rep1	135	20	55	3389.4	NA	NA	NA
G13-2682R2	Pop1	AU02-3104 x G00-3213(3)R2	Set1	Year_2014	Plains	Rep1	142	20	48	3806.35	NA	NA	NA
G13-2685R2	Pop1	AU02-3104 x G00-3213(3)R2	Set1	Year_2014	Plains	Rep1	130	19	53	3295.25	NA	NA	NA
G13-2692R2	Pop1	AU02-3104 x G00-3213(3)R2	Set1	Year_2014	Plains	Rep1	143	20	47	3725.65	NA	NA	NA
G13-2693R2	Pop1	AU02-3104 x G00-3213(3)R2	Set1	Year_2014	Plains	Rep1	114	18	54	3483.55	NA	NA	NA
G13-2696R2	Pop1	AU02-3104 x G00-3213(3)R2	Set1	Year_2014	Plains	Rep1	104	17	49	3967.75	NA	NA	NA
G13-2699R2	Pop1	AU02-3104 x G00-3213(3)R2	Set1	Year_2014	Plains	Rep1	131	19	54	3463.38	NA	NA	NA
AG6534	check	check	Set1	Year_2014	Plains	Rep2	244	24	46	4075.35	NA	NA	NA
AG7733	check	check	Set1	Year_2014	Plains	Rep2	211	21	56	4035	NA	NA	NA
G13-2314R2	Pop1	AU02-3104 x G00-3213(3)R2	Set1	Year_2014	Plains	Rep2	210	21	55	3846.7	NA	NA	NA
G13-2315R2	Pop1	AU02-3104 x G00-3213(3)R2	Set1	Year_2014	Plains	Rep2	236	24	54	3705.47	NA	NA	NA
G13-2335R2	Pop1	AU02-3104 x G00-3213(3)R2	Set1	Year_2014	Plains	Rep2	228	23	51	4129.15	NA	NA	NA
G13-2346R2	Pop1	AU02-3104 x G00-3213(3)R2	Set1	Year_2014	Plains	Rep2	207	21	52	3483.55	NA	NA	NA
G13-2350R2	Pop1	AU02-3104 x G00-3213(3)R2	Set1	Year_2014	Plains	Rep2	229	23	52	3449.93	NA	NA	NA
G13-2351R2	Pop1	AU02-3104 x G00-3213(3)R2	Set1	Year_2014	Plains	Rep2	205	21	50	3927.4	NA	NA	NA
G13-2361R2	Pop1	AU02-3104 x G00-3213(3)R2	Set1	Year_2014	Plains	Rep2	232	23	55	3342.32	NA	NA	NA
G13-2377R2	Pop1	AU02-3104 x G00-3213(3)R2	Set1	Year_2014	Plains	Rep2	204	21	49	3752.55	NA	NA	NA
G13-2378R2	Pop1	AU02-3104 x G00-3213(3)R2	Set1	Year_2014	Plains	Rep2	201	21	46	4270.38	NA	NA	NA
G13-2390R2	Pop1	AU02-3104 x G00-3213(3)R2	Set1	Year_2014	Plains	Rep2	242	24	48	4048.45	NA	NA	NA
G13-2405R2	Pop1	AU02-3104 x G00-3213(3)R2	Set1	Year_2014	Plains	Rep2	226	23	49	4189.68	NA	NA	NA
G13-2412R2	Pop1	AU02-3104 x G00-3213(3)R2	Set1	Year_2014	Plains	Rep2	235	24	55	4048.45	NA	NA	NA
G13-2435R2	Pop1	AU02-3104 x G00-3213(3)R2	Set1	Year_2014	Plains	Rep2	213	22	55	3671.85	NA	NA	NA
G13-2449R2	Pop1	AU02-3104 x G00-3213(3)R2	Set1	Year_2014	Plains	Rep2	237	24	53	3497	NA	NA	NA
G13-2451R2	Pop1	AU02-3104 x G00-3213(3)R2	Set1	Year_2014	Plains	Rep2	238	24	52	4149.32	NA	NA	NA
G13-2454R2	Pop1	AU02-3104 x G00-3213(3)R2	Set1	Year_2014	Plains	Rep2	243	24	47	4902.52	NA	NA	NA
G13-2469R2	Pop1	AU02-3104 x G00-3213(3)R2	Set1	Year_2014	Plains	Rep2	230	23	53	4001.38	NA	NA	NA
G13-2471R2	Pop1	AU02-3104 x G00-3213(3)R2	Set1	Year_2014	Plains	Rep2	206	21	51	3853.43	NA	NA	NA
G13-2473R2	Pop1	AU02-3104 x G00-3213(3)R2	Set1	Year_2014	Plains	Rep2	225	23	48	3685.3	NA	NA	NA
G13-2476R2	Pop1	AU02-3104 x G00-3213(3)R2	Set1	Year_2014	Plains	Rep2	220	22	48	3322.15	NA	NA	NA
G13-2484R2	Pop1	AU02-3104 x G00-3213(3)R2	Set1	Year_2014	Plains	Rep2	222	22	46	4344.35	NA	NA	NA
G13-2486R2	Pop1	AU02-3104 x G00-3213(3)R2	Set1	Year_2014	Plains	Rep2	231	23	54	3813.07	NA	NA	NA
G13-2489R2	Pop1	AU02-3104 x G00-3213(3)R2	Set1	Year_2014	Plains	Rep2	212	22	56	3752.55	NA	NA	NA
G13-2547R2	Pop1	AU02-3104 x G00-3213(3)R2	Set1	Year_2014	Plains	Rep2	219	22	49	3322.15	NA	NA	NA
G13-2559R2	Pop1	AU02-3104 x G00-3213(3)R2	Set1	Year_2014	Plains	Rep2	217	22	51	3335.6	NA	NA	NA
G13-2587R2	Pop1	AU02-3104 x G00-3213(3)R2	Set1	Year_2014	Plains	Rep2	234	24	56	3732.38	NA	NA	NA
G13-2605R2	Pop1	AU02-3104 x G00-3213(3)R2	Set1	Year_2014	Plains	Rep2	209	21	54	3671.85	NA	NA	NA
G13-2606R2	Pop1	AU02-3104 x G00-3213(3)R2	Set1	Year_2014	Plains	Rep2	214	22	54	3766	NA	NA	NA
G13-2608R2	Pop1	AU02-3104 x G00-3213(3)R2	Set1	Year_2014	Plains	Rep2	203	21	48	3597.88	NA	NA	NA
G13-2611R2	Pop1	AU02-3104 x G00-3213(3)R2	Set1	Year_2014	Plains	Rep2	223	23	46	4485.57	NA	NA	NA
G13-2613R2	Pop1	AU02-3104 x G00-3213(3)R2	Set1	Year_2014	Plains	Rep2	216	22	52	3947.57	NA	NA	NA
G13-2617R2	Pop1	AU02-3104 x G00-3213(3)R2	Set1	Year_2014	Plains	Rep2	202	21	47	3866.88	NA	NA	NA
G13-2618R2	Pop1	AU02-3104 x G00-3213(3)R2	Set1	Year_2014	Plains	Rep2	239	24	51	3241.45	NA	NA	NA
G13-2636R2	Pop1	AU02-3104 x G00-3213(3)R2	Set1	Year_2014	Plains	Rep2	240	24	50	4848.73	NA	NA	NA
G13-2648R2	Pop1	AU02-3104 x G00-3213(3)R2	Set1	Year_2014	Plains	Rep2	224	23	47	4236.75	NA	NA	NA
G13-2680R2	Pop1	AU02-3104 x G00-3213(3)R2	Set1	Year_2014	Plains	Rep2	241	24	49	2959	NA	NA	NA
G13-2682R2	Pop1	AU02-3104 x G00-3213(3)R2	Set1	Year_2014	Plains	Rep2	218	22	50	4351.07	NA	NA	NA
G13-2685R2	Pop1	AU02-3104 x G00-3213(3)R2	Set1	Year_2014	Plains	Rep2	233	23	56	3550.8	NA	NA	NA
G13-2692R2	Pop1	AU02-3104 x G00-3213(3)R2	Set1	Year_2014	Plains	Rep2	208	21	53	3349.05	NA	NA	NA
G13-2693R2	Pop1	AU02-3104 x G00-3213(3)R2	Set1	Year_2014	Plains	Rep2	227	23	50	4310.73	NA	NA	NA
G13-2696R2	Pop1	AU02-3104 x G00-3213(3)R2	Set1	Year_2014	Plains	Rep2	221	22	47	4035	NA	NA	NA
G13-2699R2	Pop1	AU02-3104 x G00-3213(3)R2	Set1	Year_2014	Plains	Rep2	215	22	53	3786.18	NA	NA	NA
AG7733	check	check	Set2	Year_2014	Plains	Rep1	106	1	62	3853.43	NA	NA	NA
AG7934	check	check	Set2	Year_2014	Plains	Rep1	141	4	60	3537.35	NA	NA	NA
G13-2304R2	Pop1	AU02-3104 x G00-3213(3)R2	Set2	Year_2014	Plains	Rep1	117	2	62	3786.18	NA	NA	NA
G13-2307R2	Pop1	AU02-3104 x G00-3213(3)R2	Set2	Year_2014	Plains	Rep1	127	3	61	4035	NA	NA	NA
G13-2312R2	Pop1	AU02-3104 x G00-3213(3)R2	Set2	Year_2014	Plains	Rep1	118	2	61	3772.72	NA	NA	NA
G13-2322R2	Pop1	AU02-3104 x G00-3213(3)R2	Set2	Year_2014	Plains	Rep1	130	3	64	4411.6	NA	NA	NA
G13-2324R2	Pop1	AU02-3104 x G00-3213(3)R2	Set2	Year_2014	Plains	Rep1	101	1	57	4075.35	NA	NA	NA
G13-2353R2	Pop1	AU02-3104 x G00-3213(3)R2	Set2	Year_2014	Plains	Rep1	111	1	67	4593.18	NA	NA	NA
G13-2355R2	Pop1	AU02-3104 x G00-3213(3)R2	Set2	Year_2014	Plains	Rep1	104	1	60	4418.32	NA	NA	NA
G13-2366R2	Pop1	AU02-3104 x G00-3213(3)R2	Set2	Year_2014	Plains	Rep1	129	3	63	3718.93	NA	NA	NA
G13-2368R2	Pop1	AU02-3104 x G00-3213(3)R2	Set2	Year_2014	Plains	Rep1	123	3	57	3893.78	NA	NA	NA
G13-2372R2	Pop1	AU02-3104 x G00-3213(3)R2	Set2	Year_2014	Plains	Rep1	112	2	67	3806.35	NA	NA	NA
G13-2375R2	Pop1	AU02-3104 x G00-3213(3)R2	Set2	Year_2014	Plains	Rep1	132	3	66	3429.75	NA	NA	NA
G13-2376R2	Pop1	AU02-3104 x G00-3213(3)R2	Set2	Year_2014	Plains	Rep1	107	1	63	3597.88	NA	NA	NA
G13-2379R2	Pop1	AU02-3104 x G00-3213(3)R2	Set2	Year_2014	Plains	Rep1	144	4	57	4606.62	NA	NA	NA
G13-2384R2	Pop1	AU02-3104 x G00-3213(3)R2	Set2	Year_2014	Plains	Rep1	105	1	61	4048.45	NA	NA	NA
G13-2385R2	Pop1	AU02-3104 x G00-3213(3)R2	Set2	Year_2014	Plains	Rep1	103	1	59	3483.55	NA	NA	NA
G13-2387R2	Pop1	AU02-3104 x G00-3213(3)R2	Set2	Year_2014	Plains	Rep1	125	3	59	3429.75	NA	NA	NA
G13-2389R2	Pop1	AU02-3104 x G00-3213(3)R2	Set2	Year_2014	Plains	Rep1	115	2	64	3819.8	NA	NA	NA
G13-2394R2	Pop1	AU02-3104 x G00-3213(3)R2	Set2	Year_2014	Plains	Rep1	120	2	59	3833.25	NA	NA	NA
G13-2400R2	Pop1	AU02-3104 x G00-3213(3)R2	Set2	Year_2014	Plains	Rep1	128	3	62	3826.53	NA	NA	NA
G13-2401R2	Pop1	AU02-3104 x G00-3213(3)R2	Set2	Year_2014	Plains	Rep1	102	1	58	3537.35	NA	NA	NA
G13-2407R2	Pop1	AU02-3104 x G00-3213(3)R2	Set2	Year_2014	Plains	Rep1	122	2	57	3974.47	NA	NA	NA
G13-2414R2	Pop1	AU02-3104 x G00-3213(3)R2	Set2	Year_2014	Plains	Rep1	124	3	58	4122.43	NA	NA	NA
G13-2418R2	Pop1	AU02-3104 x G00-3213(3)R2	Set2	Year_2014	Plains	Rep1	143	4	58	3712.2	NA	NA	NA
G13-2421R2	Pop1	AU02-3104 x G00-3213(3)R2	Set2	Year_2014	Plains	Rep1	140	4	61	3846.7	NA	NA	NA
G13-2453R2	Pop1	AU02-3104 x G00-3213(3)R2	Set2	Year_2014	Plains	Rep1	138	4	63	4371.25	NA	NA	NA
G13-2463R2	Pop1	AU02-3104 x G00-3213(3)R2	Set2	Year_2014	Plains	Rep1	134	4	67	3497	NA	NA	NA
G13-2529R2	Pop1	AU02-3104 x G00-3213(3)R2	Set2	Year_2014	Plains	Rep1	113	2	66	3907.22	NA	NA	NA
G13-2532R2	Pop1	AU02-3104 x G00-3213(3)R2	Set2	Year_2014	Plains	Rep1	135	4	66	3913.95	NA	NA	NA
G13-2533R2	Pop1	AU02-3104 x G00-3213(3)R2	Set2	Year_2014	Plains	Rep1	108	1	64	4129.15	NA	NA	NA
G13-2534R2	Pop1	AU02-3104 x G00-3213(3)R2	Set2	Year_2014	Plains	Rep1	110	1	66	3214.55	NA	NA	NA
G13-2536R2	Pop1	AU02-3104 x G00-3213(3)R2	Set2	Year_2014	Plains	Rep1	119	2	60	3389.4	NA	NA	NA
G13-2551R2	Pop1	AU02-3104 x G00-3213(3)R2	Set2	Year_2014	Plains	Rep1	137	4	64	2340.3	NA	NA	NA
G13-2579R2	Pop1	AU02-3104 x G00-3213(3)R2	Set2	Year_2014	Plains	Rep1	131	3	65	3739.1	NA	NA	NA
G13-2596R2	Pop1	AU02-3104 x G00-3213(3)R2	Set2	Year_2014	Plains	Rep1	116	2	63	3194.38	NA	NA	NA
G13-2607R2	Pop1	AU02-3104 x G00-3213(3)R2	Set2	Year_2014	Plains	Rep1	136	4	65	3725.65	NA	NA	NA
G13-2649R2	Pop1	AU02-3104 x G00-3213(3)R2	Set2	Year_2014	Plains	Rep1	126	3	60	3947.57	NA	NA	NA
G13-2650R2	Pop1	AU02-3104 x G00-3213(3)R2	Set2	Year_2014	Plains	Rep1	133	3	67	4620.07	NA	NA	NA
G13-2671R2	Pop1	AU02-3104 x G00-3213(3)R2	Set2	Year_2014	Plains	Rep1	109	1	65	4747.85	NA	NA	NA
G13-2672R2	Pop1	AU02-3104 x G00-3213(3)R2	Set2	Year_2014	Plains	Rep1	121	2	58	3644.95	NA	NA	NA
G13-2673R2	Pop1	AU02-3104 x G00-3213(3)R2	Set2	Year_2014	Plains	Rep1	142	4	59	3416.3	NA	NA	NA
G13-2679R2	Pop1	AU02-3104 x G00-3213(3)R2	Set2	Year_2014	Plains	Rep1	139	4	62	3638.22	NA	NA	NA
G13-2686R2	Pop1	AU02-3104 x G00-3213(3)R2	Set2	Year_2014	Plains	Rep1	114	2	65	3813.07	NA	NA	NA
AG7733	check	check	Set2	Year_2014	Plains	Rep2	225	7	59	3665.12	NA	NA	NA
AG7934	check	check	Set2	Year_2014	Plains	Rep2	231	7	65	3866.88	NA	NA	NA
G13-2304R2	Pop1	AU02-3104 x G00-3213(3)R2	Set2	Year_2014	Plains	Rep2	217	6	62	3839.97	NA	NA	NA
G13-2307R2	Pop1	AU02-3104 x G00-3213(3)R2	Set2	Year_2014	Plains	Rep2	202	5	58	4082.07	NA	NA	NA
G13-2312R2	Pop1	AU02-3104 x G00-3213(3)R2	Set2	Year_2014	Plains	Rep2	223	7	57	3853.43	NA	NA	NA
G13-2322R2	Pop1	AU02-3104 x G00-3213(3)R2	Set2	Year_2014	Plains	Rep2	216	6	63	4351.07	NA	NA	NA
G13-2324R2	Pop1	AU02-3104 x G00-3213(3)R2	Set2	Year_2014	Plains	Rep2	221	6	58	3174.2	NA	NA	NA
G13-2353R2	Pop1	AU02-3104 x G00-3213(3)R2	Set2	Year_2014	Plains	Rep2	235	8	66	3974.47	NA	NA	NA
G13-2355R2	Pop1	AU02-3104 x G00-3213(3)R2	Set2	Year_2014	Plains	Rep2	206	5	62	3967.75	NA	NA	NA
G13-2366R2	Pop1	AU02-3104 x G00-3213(3)R2	Set2	Year_2014	Plains	Rep2	224	7	58	3961.03	NA	NA	NA
G13-2368R2	Pop1	AU02-3104 x G00-3213(3)R2	Set2	Year_2014	Plains	Rep2	203	5	59	3510.45	NA	NA	NA
G13-2372R2	Pop1	AU02-3104 x G00-3213(3)R2	Set2	Year_2014	Plains	Rep2	218	6	61	3517.18	NA	NA	NA
G13-2375R2	Pop1	AU02-3104 x G00-3213(3)R2	Set2	Year_2014	Plains	Rep2	208	5	64	3900.5	NA	NA	NA
G13-2376R2	Pop1	AU02-3104 x G00-3213(3)R2	Set2	Year_2014	Plains	Rep2	240	8	61	3698.75	NA	NA	NA
G13-2379R2	Pop1	AU02-3104 x G00-3213(3)R2	Set2	Year_2014	Plains	Rep2	233	7	67	4008.1	NA	NA	NA
G13-2384R2	Pop1	AU02-3104 x G00-3213(3)R2	Set2	Year_2014	Plains	Rep2	219	6	60	3940.85	NA	NA	NA
G13-2385R2	Pop1	AU02-3104 x G00-3213(3)R2	Set2	Year_2014	Plains	Rep2	210	5	66	3497	NA	NA	NA
G13-2387R2	Pop1	AU02-3104 x G00-3213(3)R2	Set2	Year_2014	Plains	Rep2	220	6	59	3429.75	NA	NA	NA
G13-2389R2	Pop1	AU02-3104 x G00-3213(3)R2	Set2	Year_2014	Plains	Rep2	204	5	60	3967.75	NA	NA	NA
G13-2394R2	Pop1	AU02-3104 x G00-3213(3)R2	Set2	Year_2014	Plains	Rep2	226	7	60	3913.95	NA	NA	NA
G13-2400R2	Pop1	AU02-3104 x G00-3213(3)R2	Set2	Year_2014	Plains	Rep2	232	7	66	3234.72	NA	NA	NA
G13-2401R2	Pop1	AU02-3104 x G00-3213(3)R2	Set2	Year_2014	Plains	Rep2	243	8	58	3443.2	NA	NA	NA
G13-2407R2	Pop1	AU02-3104 x G00-3213(3)R2	Set2	Year_2014	Plains	Rep2	237	8	64	4243.48	NA	NA	NA
G13-2414R2	Pop1	AU02-3104 x G00-3213(3)R2	Set2	Year_2014	Plains	Rep2	207	5	63	3483.55	NA	NA	NA
G13-2418R2	Pop1	AU02-3104 x G00-3213(3)R2	Set2	Year_2014	Plains	Rep2	228	7	62	3423.03	NA	NA	NA
G13-2421R2	Pop1	AU02-3104 x G00-3213(3)R2	Set2	Year_2014	Plains	Rep2	215	6	64	3584.43	NA	NA	NA
G13-2453R2	Pop1	AU02-3104 x G00-3213(3)R2	Set2	Year_2014	Plains	Rep2	242	8	59	4223.3	NA	NA	NA
G13-2463R2	Pop1	AU02-3104 x G00-3213(3)R2	Set2	Year_2014	Plains	Rep2	238	8	63	3396.12	NA	NA	NA
G13-2529R2	Pop1	AU02-3104 x G00-3213(3)R2	Set2	Year_2014	Plains	Rep2	230	7	64	4579.73	NA	NA	NA
G13-2532R2	Pop1	AU02-3104 x G00-3213(3)R2	Set2	Year_2014	Plains	Rep2	222	6	57	3537.35	NA	NA	NA
G13-2533R2	Pop1	AU02-3104 x G00-3213(3)R2	Set2	Year_2014	Plains	Rep2	244	8	57	3739.1	NA	NA	NA
G13-2534R2	Pop1	AU02-3104 x G00-3213(3)R2	Set2	Year_2014	Plains	Rep2	241	8	60	3443.2	NA	NA	NA
G13-2536R2	Pop1	AU02-3104 x G00-3213(3)R2	Set2	Year_2014	Plains	Rep2	201	5	57	3584.43	NA	NA	NA
G13-2551R2	Pop1	AU02-3104 x G00-3213(3)R2	Set2	Year_2014	Plains	Rep2	214	6	65	2582.4	NA	NA	NA
G13-2579R2	Pop1	AU02-3104 x G00-3213(3)R2	Set2	Year_2014	Plains	Rep2	227	7	61	3517.18	NA	NA	NA
G13-2596R2	Pop1	AU02-3104 x G00-3213(3)R2	Set2	Year_2014	Plains	Rep2	205	5	61	3732.38	NA	NA	NA
G13-2607R2	Pop1	AU02-3104 x G00-3213(3)R2	Set2	Year_2014	Plains	Rep2	229	7	63	2965.72	NA	NA	NA
G13-2649R2	Pop1	AU02-3104 x G00-3213(3)R2	Set2	Year_2014	Plains	Rep2	234	8	67	4061.9	NA	NA	NA
G13-2650R2	Pop1	AU02-3104 x G00-3213(3)R2	Set2	Year_2014	Plains	Rep2	239	8	62	4398.15	NA	NA	NA
G13-2671R2	Pop1	AU02-3104 x G00-3213(3)R2	Set2	Year_2014	Plains	Rep2	213	6	66	3987.93	NA	NA	NA
G13-2672R2	Pop1	AU02-3104 x G00-3213(3)R2	Set2	Year_2014	Plains	Rep2	211	5	67	4196.4	NA	NA	NA
G13-2673R2	Pop1	AU02-3104 x G00-3213(3)R2	Set2	Year_2014	Plains	Rep2	209	5	65	4061.9	NA	NA	NA
G13-2679R2	Pop1	AU02-3104 x G00-3213(3)R2	Set2	Year_2014	Plains	Rep2	212	6	67	3295.25	NA	NA	NA
G13-2686R2	Pop1	AU02-3104 x G00-3213(3)R2	Set2	Year_2014	Plains	Rep2	236	8	65	3907.22	NA	NA	NA
AG6534	check	check	Set1	Year_2016	Plains	Rep1	138	4	56	3268.35	41.99	19.72	NA
AG7733	check	check	Set1	Year_2016	Plains	Rep1	112	2	60	4008.1	40.42	19.09	NA
G13-2314R2	Pop1	AU02-3104 x G00-3213(3)R2	Set1	Year_2016	Plains	Rep1	118	2	54	3436.47	38.49	20.99	NA
G13-2315R2	Pop1	AU02-3104 x G00-3213(3)R2	Set1	Year_2016	Plains	Rep1	111	1	60	3665.12	39.24	21.08	NA
G13-2335R2	Pop1	AU02-3104 x G00-3213(3)R2	Set1	Year_2016	Plains	Rep1	130	3	57	2642.93	39.6	20.66	NA
G13-2346R2	Pop1	AU02-3104 x G00-3213(3)R2	Set1	Year_2016	Plains	Rep1	113	2	59	3456.65	39.67	20.5	NA
G13-2350R2	Pop1	AU02-3104 x G00-3213(3)R2	Set1	Year_2016	Plains	Rep1	123	3	50	4008.1	38.55	20.43	NA
G13-2351R2	Pop1	AU02-3104 x G00-3213(3)R2	Set1	Year_2016	Plains	Rep1	104	1	53	3638.22	38	20.55	NA
G13-2361R2	Pop1	AU02-3104 x G00-3213(3)R2	Set1	Year_2016	Plains	Rep1	122	2	50	3813.07	39.44	20.79	NA
G13-2377R2	Pop1	AU02-3104 x G00-3213(3)R2	Set1	Year_2016	Plains	Rep1	121	2	51	3268.35	40.72	20.38	NA
G13-2378R2	Pop1	AU02-3104 x G00-3213(3)R2	Set1	Year_2016	Plains	Rep1	120	2	52	3322.15	40.07	20.1	NA
G13-2390R2	Pop1	AU02-3104 x G00-3213(3)R2	Set1	Year_2016	Plains	Rep1	134	4	60	4236.75	39.13	20.95	NA
G13-2405R2	Pop1	AU02-3104 x G00-3213(3)R2	Set1	Year_2016	Plains	Rep1	137	4	57	4008.1	38.32	20.21	NA
G13-2412R2	Pop1	AU02-3104 x G00-3213(3)R2	Set1	Year_2016	Plains	Rep1	109	1	58	3550.8	37.49	21.96	NA
G13-2435R2	Pop1	AU02-3104 x G00-3213(3)R2	Set1	Year_2016	Plains	Rep1	124	3	51	3288.53	38.54	20.97	NA
G13-2449R2	Pop1	AU02-3104 x G00-3213(3)R2	Set1	Year_2016	Plains	Rep1	126	3	53	3449.93	37.99	20.5	NA
G13-2451R2	Pop1	AU02-3104 x G00-3213(3)R2	Set1	Year_2016	Plains	Rep1	119	2	53	3631.5	39.35	20.49	NA
G13-2454R2	Pop1	AU02-3104 x G00-3213(3)R2	Set1	Year_2016	Plains	Rep1	107	1	56	3537.35	37.71	20.87	NA
G13-2469R2	Pop1	AU02-3104 x G00-3213(3)R2	Set1	Year_2016	Plains	Rep1	144	4	50	3833.25	38.59	20.71	NA
G13-2471R2	Pop1	AU02-3104 x G00-3213(3)R2	Set1	Year_2016	Plains	Rep1	139	4	55	3981.2	37.84	22	NA
G13-2473R2	Pop1	AU02-3104 x G00-3213(3)R2	Set1	Year_2016	Plains	Rep1	132	3	59	3409.57	38.25	20.84	NA
G13-2476R2	Pop1	AU02-3104 x G00-3213(3)R2	Set1	Year_2016	Plains	Rep1	106	1	55	3476.82	38.31	20.91	NA
G13-2484R2	Pop1	AU02-3104 x G00-3213(3)R2	Set1	Year_2016	Plains	Rep1	108	1	57	4236.75	38.52	20.54	NA
G13-2486R2	Pop1	AU02-3104 x G00-3213(3)R2	Set1	Year_2016	Plains	Rep1	128	3	55	3718.93	39.21	21.09	NA
G13-2489R2	Pop1	AU02-3104 x G00-3213(3)R2	Set1	Year_2016	Plains	Rep1	115	2	57	3577.7	39.52	20.6	NA
G13-2547R2	Pop1	AU02-3104 x G00-3213(3)R2	Set1	Year_2016	Plains	Rep1	143	4	51	3712.2	39.53	20.38	NA
G13-2559R2	Pop1	AU02-3104 x G00-3213(3)R2	Set1	Year_2016	Plains	Rep1	102	1	51	3718.93	39.92	20.32	NA
G13-2587R2	Pop1	AU02-3104 x G00-3213(3)R2	Set1	Year_2016	Plains	Rep1	133	3	60	3443.2	40.72	20.89	NA
G13-2605R2	Pop1	AU02-3104 x G00-3213(3)R2	Set1	Year_2016	Plains	Rep1	131	3	58	3806.35	39.89	20.25	NA
G13-2606R2	Pop1	AU02-3104 x G00-3213(3)R2	Set1	Year_2016	Plains	Rep1	103	1	52	4122.43	37.35	20.67	NA
G13-2608R2	Pop1	AU02-3104 x G00-3213(3)R2	Set1	Year_2016	Plains	Rep1	110	1	59	3806.35	37.91	20.87	NA
G13-2611R2	Pop1	AU02-3104 x G00-3213(3)R2	Set1	Year_2016	Plains	Rep1	136	4	58	3476.82	38.56	20.08	NA
G13-2613R2	Pop1	AU02-3104 x G00-3213(3)R2	Set1	Year_2016	Plains	Rep1	127	3	54	4055.18	39.89	20.39	NA
G13-2617R2	Pop1	AU02-3104 x G00-3213(3)R2	Set1	Year_2016	Plains	Rep1	135	4	59	3846.7	39.41	20.08	NA
G13-2618R2	Pop1	AU02-3104 x G00-3213(3)R2	Set1	Year_2016	Plains	Rep1	101	1	50	3887.05	37.86	20.6	NA
G13-2636R2	Pop1	AU02-3104 x G00-3213(3)R2	Set1	Year_2016	Plains	Rep1	129	3	56	4122.43	36.83	20.85	NA
G13-2648R2	Pop1	AU02-3104 x G00-3213(3)R2	Set1	Year_2016	Plains	Rep1	142	4	52	3604.6	38.79	20.06	NA
G13-2680R2	Pop1	AU02-3104 x G00-3213(3)R2	Set1	Year_2016	Plains	Rep1	141	4	53	4579.73	40.29	20.07	NA
G13-2682R2	Pop1	AU02-3104 x G00-3213(3)R2	Set1	Year_2016	Plains	Rep1	105	1	54	3725.65	40.14	20.82	NA
G13-2685R2	Pop1	AU02-3104 x G00-3213(3)R2	Set1	Year_2016	Plains	Rep1	116	2	56	3584.43	37.55	21.12	NA
G13-2692R2	Pop1	AU02-3104 x G00-3213(3)R2	Set1	Year_2016	Plains	Rep1	117	2	55	3187.65	38.88	21.22	NA
G13-2693R2	Pop1	AU02-3104 x G00-3213(3)R2	Set1	Year_2016	Plains	Rep1	125	3	52	3927.4	40.59	21.15	NA
G13-2696R2	Pop1	AU02-3104 x G00-3213(3)R2	Set1	Year_2016	Plains	Rep1	114	2	58	3550.8	40.06	20.53	NA
G13-2699R2	Pop1	AU02-3104 x G00-3213(3)R2	Set1	Year_2016	Plains	Rep1	140	4	54	2427.72	40.5	19.89	NA
AG6534	check	check	Set1	Year_2016	Plains	Rep2	211	5	60	3443.2	41.46	19.95	NA
AG7733	check	check	Set1	Year_2016	Plains	Rep2	213	6	59	3839.97	41.15	19	NA
G13-2314R2	Pop1	AU02-3104 x G00-3213(3)R2	Set1	Year_2016	Plains	Rep2	205	5	54	3772.72	39.29	21.02	NA
G13-2315R2	Pop1	AU02-3104 x G00-3213(3)R2	Set1	Year_2016	Plains	Rep2	204	5	53	3658.4	40.16	21.01	NA
G13-2335R2	Pop1	AU02-3104 x G00-3213(3)R2	Set1	Year_2016	Plains	Rep2	216	6	56	3019.53	39.74	20.51	NA
G13-2346R2	Pop1	AU02-3104 x G00-3213(3)R2	Set1	Year_2016	Plains	Rep2	203	5	52	3685.3	39.48	20.9	NA
G13-2350R2	Pop1	AU02-3104 x G00-3213(3)R2	Set1	Year_2016	Plains	Rep2	220	6	52	4088.8	39.21	20.55	NA
G13-2351R2	Pop1	AU02-3104 x G00-3213(3)R2	Set1	Year_2016	Plains	Rep2	227	7	54	3839.97	38.36	21.3	NA
G13-2361R2	Pop1	AU02-3104 x G00-3213(3)R2	Set1	Year_2016	Plains	Rep2	231	7	58	4539.38	40.5	20.54	NA
G13-2377R2	Pop1	AU02-3104 x G00-3213(3)R2	Set1	Year_2016	Plains	Rep2	221	6	51	3692.03	40.88	20.73	NA
G13-2378R2	Pop1	AU02-3104 x G00-3213(3)R2	Set1	Year_2016	Plains	Rep2	241	8	53	4095.53	39.9	20.95	NA
G13-2390R2	Pop1	AU02-3104 x G00-3213(3)R2	Set1	Year_2016	Plains	Rep2	212	6	60	3550.8	40.02	20.61	NA
G13-2405R2	Pop1	AU02-3104 x G00-3213(3)R2	Set1	Year_2016	Plains	Rep2	238	8	56	4458.68	37.48	21.04	NA
G13-2412R2	Pop1	AU02-3104 x G00-3213(3)R2	Set1	Year_2016	Plains	Rep2	201	5	50	3597.88	38	22.1	NA
G13-2435R2	Pop1	AU02-3104 x G00-3213(3)R2	Set1	Year_2016	Plains	Rep2	224	7	51	3544.07	40.33	20.5	NA
G13-2449R2	Pop1	AU02-3104 x G00-3213(3)R2	Set1	Year_2016	Plains	Rep2	242	8	52	3987.93	38.52	20.09	NA
G13-2451R2	Pop1	AU02-3104 x G00-3213(3)R2	Set1	Year_2016	Plains	Rep2	206	5	55	3813.07	39.12	20.89	NA
G13-2454R2	Pop1	AU02-3104 x G00-3213(3)R2	Set1	Year_2016	Plains	Rep2	239	8	55	3846.7	37.21	21.94	NA
G13-2469R2	Pop1	AU02-3104 x G00-3213(3)R2	Set1	Year_2016	Plains	Rep2	222	6	50	4357.8	37.9	20.55	NA
G13-2471R2	Pop1	AU02-3104 x G00-3213(3)R2	Set1	Year_2016	Plains	Rep2	218	6	54	3759.28	38.24	21.51	NA
G13-2473R2	Pop1	AU02-3104 x G00-3213(3)R2	Set1	Year_2016	Plains	Rep2	207	5	56	3987.93	37.89	20.67	NA
G13-2476R2	Pop1	AU02-3104 x G00-3213(3)R2	Set1	Year_2016	Plains	Rep2	223	7	50	3819.8	39.95	20.84	NA
G13-2484R2	Pop1	AU02-3104 x G00-3213(3)R2	Set1	Year_2016	Plains	Rep2	217	6	55	4546.1	39.83	20.28	NA
G13-2486R2	Pop1	AU02-3104 x G00-3213(3)R2	Set1	Year_2016	Plains	Rep2	235	8	59	3604.6	39.19	21.24	NA
G13-2489R2	Pop1	AU02-3104 x G00-3213(3)R2	Set1	Year_2016	Plains	Rep2	226	7	53	4102.25	40.48	20.64	NA
G13-2547R2	Pop1	AU02-3104 x G00-3213(3)R2	Set1	Year_2016	Plains	Rep2	209	5	58	3644.95	39.94	20.7	NA
G13-2559R2	Pop1	AU02-3104 x G00-3213(3)R2	Set1	Year_2016	Plains	Rep2	233	7	60	4122.43	40.06	20.39	NA
G13-2587R2	Pop1	AU02-3104 x G00-3213(3)R2	Set1	Year_2016	Plains	Rep2	208	5	57	3839.97	40.69	21.05	NA
G13-2605R2	Pop1	AU02-3104 x G00-3213(3)R2	Set1	Year_2016	Plains	Rep2	234	8	60	4344.35	39.72	20.23	NA
G13-2606R2	Pop1	AU02-3104 x G00-3213(3)R2	Set1	Year_2016	Plains	Rep2	237	8	57	4304	36.6	21.09	NA
G13-2608R2	Pop1	AU02-3104 x G00-3213(3)R2	Set1	Year_2016	Plains	Rep2	214	6	58	3611.32	39.28	20.01	NA
G13-2611R2	Pop1	AU02-3104 x G00-3213(3)R2	Set1	Year_2016	Plains	Rep2	215	6	57	3873.6	39.55	20	NA
G13-2613R2	Pop1	AU02-3104 x G00-3213(3)R2	Set1	Year_2016	Plains	Rep2	240	8	54	4283.82	39.09	21.51	NA
G13-2617R2	Pop1	AU02-3104 x G00-3213(3)R2	Set1	Year_2016	Plains	Rep2	244	8	50	3833.25	38.58	20.72	NA
G13-2618R2	Pop1	AU02-3104 x G00-3213(3)R2	Set1	Year_2016	Plains	Rep2	229	7	56	4364.52	38.12	20.67	NA
G13-2636R2	Pop1	AU02-3104 x G00-3213(3)R2	Set1	Year_2016	Plains	Rep2	210	5	59	4223.3	37.72	20.44	NA
G13-2648R2	Pop1	AU02-3104 x G00-3213(3)R2	Set1	Year_2016	Plains	Rep2	243	8	51	3913.95	39.09	20.53	NA
G13-2680R2	Pop1	AU02-3104 x G00-3213(3)R2	Set1	Year_2016	Plains	Rep2	225	7	52	4216.57	39.92	20.32	NA
G13-2682R2	Pop1	AU02-3104 x G00-3213(3)R2	Set1	Year_2016	Plains	Rep2	219	6	53	3752.55	40.2	21.68	NA
G13-2685R2	Pop1	AU02-3104 x G00-3213(3)R2	Set1	Year_2016	Plains	Rep2	236	8	58	4182.95	38.15	20.89	NA
G13-2692R2	Pop1	AU02-3104 x G00-3213(3)R2	Set1	Year_2016	Plains	Rep2	232	7	59	3745.82	38.77	21.67	NA
G13-2693R2	Pop1	AU02-3104 x G00-3213(3)R2	Set1	Year_2016	Plains	Rep2	202	5	51	3940.85	41.14	20.79	NA
G13-2696R2	Pop1	AU02-3104 x G00-3213(3)R2	Set1	Year_2016	Plains	Rep2	228	7	55	3544.07	40.03	20.62	NA
G13-2699R2	Pop1	AU02-3104 x G00-3213(3)R2	Set1	Year_2016	Plains	Rep2	230	7	57	2663.1	40.32	20.77	NA
AG6534	check	check	Set1	Year_2016	Plains	Rep3	311	9	60	3624.78	41.93	19.75	NA
AG7733	check	check	Set1	Year_2016	Plains	Rep3	318	10	54	3772.72	41.73	19.19	NA
G13-2314R2	Pop1	AU02-3104 x G00-3213(3)R2	Set1	Year_2016	Plains	Rep3	343	12	51	3281.8	40.84	20.16	NA
G13-2315R2	Pop1	AU02-3104 x G00-3213(3)R2	Set1	Year_2016	Plains	Rep3	319	10	53	3194.38	40.27	21.2	NA
G13-2335R2	Pop1	AU02-3104 x G00-3213(3)R2	Set1	Year_2016	Plains	Rep3	336	12	58	2858.12	39.74	21	NA
G13-2346R2	Pop1	AU02-3104 x G00-3213(3)R2	Set1	Year_2016	Plains	Rep3	314	10	58	3275.07	40.78	20.83	NA
G13-2350R2	Pop1	AU02-3104 x G00-3213(3)R2	Set1	Year_2016	Plains	Rep3	342	12	52	3436.47	39.89	20.35	NA
G13-2351R2	Pop1	AU02-3104 x G00-3213(3)R2	Set1	Year_2016	Plains	Rep3	332	11	59	3766	38.61	21.17	NA
G13-2361R2	Pop1	AU02-3104 x G00-3213(3)R2	Set1	Year_2016	Plains	Rep3	331	11	58	4021.55	40.39	20.67	NA
G13-2377R2	Pop1	AU02-3104 x G00-3213(3)R2	Set1	Year_2016	Plains	Rep3	316	10	56	3833.25	41.06	20.68	NA
G13-2378R2	Pop1	AU02-3104 x G00-3213(3)R2	Set1	Year_2016	Plains	Rep3	307	9	56	3759.28	40.73	20.83	NA
G13-2390R2	Pop1	AU02-3104 x G00-3213(3)R2	Set1	Year_2016	Plains	Rep3	313	10	59	4102.25	41.35	20.44	NA
G13-2405R2	Pop1	AU02-3104 x G00-3213(3)R2	Set1	Year_2016	Plains	Rep3	326	11	53	3665.12	38.85	20.5	NA
G13-2412R2	Pop1	AU02-3104 x G00-3213(3)R2	Set1	Year_2016	Plains	Rep3	329	11	56	3900.5	38.52	21.87	NA
G13-2435R2	Pop1	AU02-3104 x G00-3213(3)R2	Set1	Year_2016	Plains	Rep3	327	11	54	3416.3	40.32	20.39	NA
G13-2449R2	Pop1	AU02-3104 x G00-3213(3)R2	Set1	Year_2016	Plains	Rep3	312	10	60	3940.85	39.66	20.49	NA
G13-2451R2	Pop1	AU02-3104 x G00-3213(3)R2	Set1	Year_2016	Plains	Rep3	323	11	50	3752.55	39.53	20.81	NA
G13-2454R2	Pop1	AU02-3104 x G00-3213(3)R2	Set1	Year_2016	Plains	Rep3	320	10	52	3577.7	39.66	21.06	NA
G13-2469R2	Pop1	AU02-3104 x G00-3213(3)R2	Set1	Year_2016	Plains	Rep3	309	9	58	3618.05	39.26	20.36	NA
G13-2471R2	Pop1	AU02-3104 x G00-3213(3)R2	Set1	Year_2016	Plains	Rep3	340	12	54	3349.05	38.14	21.96	NA
G13-2473R2	Pop1	AU02-3104 x G00-3213(3)R2	Set1	Year_2016	Plains	Rep3	322	10	50	3510.45	38.98	20.62	NA
G13-2476R2	Pop1	AU02-3104 x G00-3213(3)R2	Set1	Year_2016	Plains	Rep3	330	11	57	3705.47	39.39	20.69	NA
G13-2484R2	Pop1	AU02-3104 x G00-3213(3)R2	Set1	Year_2016	Plains	Rep3	302	9	51	3631.5	40.15	20.32	NA
G13-2486R2	Pop1	AU02-3104 x G00-3213(3)R2	Set1	Year_2016	Plains	Rep3	317	10	55	3275.07	39.31	21.11	NA
G13-2489R2	Pop1	AU02-3104 x G00-3213(3)R2	Set1	Year_2016	Plains	Rep3	305	9	54	4008.1	40.78	20.68	NA
G13-2547R2	Pop1	AU02-3104 x G00-3213(3)R2	Set1	Year_2016	Plains	Rep3	338	12	56	3396.12	41.07	19.48	NA
G13-2559R2	Pop1	AU02-3104 x G00-3213(3)R2	Set1	Year_2016	Plains	Rep3	306	9	55	3692.03	41.27	20.04	NA
G13-2587R2	Pop1	AU02-3104 x G00-3213(3)R2	Set1	Year_2016	Plains	Rep3	324	11	51	2992.62	41.35	21.27	NA
G13-2605R2	Pop1	AU02-3104 x G00-3213(3)R2	Set1	Year_2016	Plains	Rep3	304	9	53	4021.55	39.09	20.91	NA
G13-2606R2	Pop1	AU02-3104 x G00-3213(3)R2	Set1	Year_2016	Plains	Rep3	335	12	59	4357.8	38.66	20.95	NA
G13-2608R2	Pop1	AU02-3104 x G00-3213(3)R2	Set1	Year_2016	Plains	Rep3	303	9	52	2965.72	39.69	20.43	NA
G13-2611R2	Pop1	AU02-3104 x G00-3213(3)R2	Set1	Year_2016	Plains	Rep3	328	11	55	3530.62	39.31	20.19	NA
G13-2613R2	Pop1	AU02-3104 x G00-3213(3)R2	Set1	Year_2016	Plains	Rep3	341	12	53	3402.85	40.89	20.23	NA
G13-2617R2	Pop1	AU02-3104 x G00-3213(3)R2	Set1	Year_2016	Plains	Rep3	339	12	55	3355.78	39.1	21.23	NA
G13-2618R2	Pop1	AU02-3104 x G00-3213(3)R2	Set1	Year_2016	Plains	Rep3	333	11	60	3712.2	38.53	20.39	NA
G13-2636R2	Pop1	AU02-3104 x G00-3213(3)R2	Set1	Year_2016	Plains	Rep3	337	12	57	4001.38	37.99	20.43	NA
G13-2648R2	Pop1	AU02-3104 x G00-3213(3)R2	Set1	Year_2016	Plains	Rep3	301	9	50	3308.7	39.52	20.4	NA
G13-2680R2	Pop1	AU02-3104 x G00-3213(3)R2	Set1	Year_2016	Plains	Rep3	308	9	57	3866.88	40.22	20.23	NA
G13-2682R2	Pop1	AU02-3104 x G00-3213(3)R2	Set1	Year_2016	Plains	Rep3	315	10	57	3604.6	40.04	21.3	NA
G13-2685R2	Pop1	AU02-3104 x G00-3213(3)R2	Set1	Year_2016	Plains	Rep3	325	11	52	3705.47	38.07	21.75	NA
G13-2692R2	Pop1	AU02-3104 x G00-3213(3)R2	Set1	Year_2016	Plains	Rep3	344	12	50	3174.2	40.22	21.34	NA
G13-2693R2	Pop1	AU02-3104 x G00-3213(3)R2	Set1	Year_2016	Plains	Rep3	321	10	51	3591.15	41.55	20.9	NA
G13-2696R2	Pop1	AU02-3104 x G00-3213(3)R2	Set1	Year_2016	Plains	Rep3	310	9	59	4028.28	40.02	20.94	NA
G13-2699R2	Pop1	AU02-3104 x G00-3213(3)R2	Set1	Year_2016	Plains	Rep3	334	12	60	1983.88	40.28	20.62	NA
AG7733	check	check	Set2	Year_2016	Plains	Rep1	105	13	54	3228	42.19	19.25	NA
AG7934	check	check	Set2	Year_2016	Plains	Rep1	116	14	56	3759.28	41.14	19.74	NA
G13-2304R2	Pop1	AU02-3104 x G00-3213(3)R2	Set2	Year_2016	Plains	Rep1	137	16	57	3497	39.89	19.9	NA
G13-2307R2	Pop1	AU02-3104 x G00-3213(3)R2	Set2	Year_2016	Plains	Rep1	139	16	55	2649.65	39.61	20.69	NA
G13-2312R2	Pop1	AU02-3104 x G00-3213(3)R2	Set2	Year_2016	Plains	Rep1	107	13	56	3423.03	41.49	20.25	NA
G13-2322R2	Pop1	AU02-3104 x G00-3213(3)R2	Set2	Year_2016	Plains	Rep1	110	13	59	3066.6	40.91	20.43	NA
G13-2324R2	Pop1	AU02-3104 x G00-3213(3)R2	Set2	Year_2016	Plains	Rep1	125	15	52	3503.72	40.37	19.73	NA
G13-2353R2	Pop1	AU02-3104 x G00-3213(3)R2	Set2	Year_2016	Plains	Rep1	109	13	58	3544.07	39.09	21.12	NA
G13-2355R2	Pop1	AU02-3104 x G00-3213(3)R2	Set2	Year_2016	Plains	Rep1	119	14	53	3073.32	41.23	20.08	NA
G13-2366R2	Pop1	AU02-3104 x G00-3213(3)R2	Set2	Year_2016	Plains	Rep1	138	16	56	3423.03	42.45	20.4	NA
G13-2368R2	Pop1	AU02-3104 x G00-3213(3)R2	Set2	Year_2016	Plains	Rep1	101	13	50	3396.12	41.89	20.22	NA
G13-2372R2	Pop1	AU02-3104 x G00-3213(3)R2	Set2	Year_2016	Plains	Rep1	103	13	52	3268.35	40.73	21.43	NA
G13-2375R2	Pop1	AU02-3104 x G00-3213(3)R2	Set2	Year_2016	Plains	Rep1	126	15	53	3301.97	42.7	19.54	NA
G13-2376R2	Pop1	AU02-3104 x G00-3213(3)R2	Set2	Year_2016	Plains	Rep1	136	16	58	2925.38	39.84	19.51	NA
G13-2379R2	Pop1	AU02-3104 x G00-3213(3)R2	Set2	Year_2016	Plains	Rep1	130	15	57	3032.97	40.72	20.76	NA
G13-2384R2	Pop1	AU02-3104 x G00-3213(3)R2	Set2	Year_2016	Plains	Rep1	127	15	54	3275.07	41.49	19.79	NA
G13-2385R2	Pop1	AU02-3104 x G00-3213(3)R2	Set2	Year_2016	Plains	Rep1	141	16	53	2831.22	40.51	20.36	NA
G13-2387R2	Pop1	AU02-3104 x G00-3213(3)R2	Set2	Year_2016	Plains	Rep1	111	13	60	3685.3	42.24	19.39	NA
G13-2389R2	Pop1	AU02-3104 x G00-3213(3)R2	Set2	Year_2016	Plains	Rep1	144	16	50	2804.32	41.34	20.34	NA
G13-2394R2	Pop1	AU02-3104 x G00-3213(3)R2	Set2	Year_2016	Plains	Rep1	121	14	51	2656.38	42.19	19.14	NA
G13-2400R2	Pop1	AU02-3104 x G00-3213(3)R2	Set2	Year_2016	Plains	Rep1	117	14	55	3712.2	39.65	20.25	NA
G13-2401R2	Pop1	AU02-3104 x G00-3213(3)R2	Set2	Year_2016	Plains	Rep1	115	14	57	3497	40.15	20.76	NA
G13-2407R2	Pop1	AU02-3104 x G00-3213(3)R2	Set2	Year_2016	Plains	Rep1	124	15	51	2858.12	39.79	20.49	NA
G13-2414R2	Pop1	AU02-3104 x G00-3213(3)R2	Set2	Year_2016	Plains	Rep1	134	16	60	3261.62	41.6	20.08	NA
G13-2418R2	Pop1	AU02-3104 x G00-3213(3)R2	Set2	Year_2016	Plains	Rep1	104	13	53	2985.9	40.73	20.04	NA
G13-2421R2	Pop1	AU02-3104 x G00-3213(3)R2	Set2	Year_2016	Plains	Rep1	129	15	56	3920.68	40.92	20.63	NA
G13-2453R2	Pop1	AU02-3104 x G00-3213(3)R2	Set2	Year_2016	Plains	Rep1	122	14	50	3180.93	41.85	19.08	NA
G13-2463R2	Pop1	AU02-3104 x G00-3213(3)R2	Set2	Year_2016	Plains	Rep1	140	16	54	3228	40.98	20.17	NA
G13-2529R2	Pop1	AU02-3104 x G00-3213(3)R2	Set2	Year_2016	Plains	Rep1	108	13	57	3201.1	40.71	19.82	NA
G13-2532R2	Pop1	AU02-3104 x G00-3213(3)R2	Set2	Year_2016	Plains	Rep1	102	13	51	2797.6	39.69	20.71	NA
G13-2533R2	Pop1	AU02-3104 x G00-3213(3)R2	Set2	Year_2016	Plains	Rep1	106	13	55	3449.93	40.15	21.2	NA
G13-2534R2	Pop1	AU02-3104 x G00-3213(3)R2	Set2	Year_2016	Plains	Rep1	143	16	51	3113.68	40.6	20.68	NA
G13-2536R2	Pop1	AU02-3104 x G00-3213(3)R2	Set2	Year_2016	Plains	Rep1	132	15	59	3342.32	38.91	21.22	NA
G13-2551R2	Pop1	AU02-3104 x G00-3213(3)R2	Set2	Year_2016	Plains	Rep1	128	15	55	3207.82	43.33	18.92	NA
G13-2579R2	Pop1	AU02-3104 x G00-3213(3)R2	Set2	Year_2016	Plains	Rep1	133	15	60	2999.35	42.79	20.19	NA
G13-2596R2	Pop1	AU02-3104 x G00-3213(3)R2	Set2	Year_2016	Plains	Rep1	113	14	59	3550.8	43.09	20.15	NA
G13-2607R2	Pop1	AU02-3104 x G00-3213(3)R2	Set2	Year_2016	Plains	Rep1	142	16	52	2562.22	42.15	19.04	NA
G13-2649R2	Pop1	AU02-3104 x G00-3213(3)R2	Set2	Year_2016	Plains	Rep1	112	14	60	3342.32	40.12	20.76	NA
G13-2650R2	Pop1	AU02-3104 x G00-3213(3)R2	Set2	Year_2016	Plains	Rep1	118	14	54	2885.03	40.71	20.35	NA
G13-2671R2	Pop1	AU02-3104 x G00-3213(3)R2	Set2	Year_2016	Plains	Rep1	131	15	58	3362.5	40.38	19.93	NA
G13-2672R2	Pop1	AU02-3104 x G00-3213(3)R2	Set2	Year_2016	Plains	Rep1	135	16	59	3167.47	40.16	21.15	NA
G13-2673R2	Pop1	AU02-3104 x G00-3213(3)R2	Set2	Year_2016	Plains	Rep1	120	14	52	3940.85	39.41	20.04	NA
G13-2679R2	Pop1	AU02-3104 x G00-3213(3)R2	Set2	Year_2016	Plains	Rep1	123	15	50	2555.5	42.42	20.15	NA
G13-2686R2	Pop1	AU02-3104 x G00-3213(3)R2	Set2	Year_2016	Plains	Rep1	114	14	58	3423.03	41.3	20.24	NA
AG7733	check	check	Set2	Year_2016	Plains	Rep2	221	18	51	3140.57	41.46	18.87	NA
AG7934	check	check	Set2	Year_2016	Plains	Rep2	203	17	52	3651.68	41.44	19.55	NA
G13-2304R2	Pop1	AU02-3104 x G00-3213(3)R2	Set2	Year_2016	Plains	Rep2	234	20	60	3335.6	39.34	20	NA
G13-2307R2	Pop1	AU02-3104 x G00-3213(3)R2	Set2	Year_2016	Plains	Rep2	213	18	59	3180.93	39.14	20.68	NA
G13-2312R2	Pop1	AU02-3104 x G00-3213(3)R2	Set2	Year_2016	Plains	Rep2	224	19	51	2649.65	41.73	20.12	NA
G13-2322R2	Pop1	AU02-3104 x G00-3213(3)R2	Set2	Year_2016	Plains	Rep2	238	20	56	2790.88	40.4	20.44	NA
G13-2324R2	Pop1	AU02-3104 x G00-3213(3)R2	Set2	Year_2016	Plains	Rep2	239	20	55	3167.47	38.7	20.33	NA
G13-2353R2	Pop1	AU02-3104 x G00-3213(3)R2	Set2	Year_2016	Plains	Rep2	212	18	60	3066.6	40.14	20	NA
G13-2355R2	Pop1	AU02-3104 x G00-3213(3)R2	Set2	Year_2016	Plains	Rep2	227	19	54	2737.07	40.75	20.36	NA
G13-2366R2	Pop1	AU02-3104 x G00-3213(3)R2	Set2	Year_2016	Plains	Rep2	233	19	60	3436.47	42.39	20.38	NA
G13-2368R2	Pop1	AU02-3104 x G00-3213(3)R2	Set2	Year_2016	Plains	Rep2	210	17	59	3705.47	41.76	20.14	NA
G13-2372R2	Pop1	AU02-3104 x G00-3213(3)R2	Set2	Year_2016	Plains	Rep2	244	20	50	3106.95	41.81	20.31	NA
G13-2375R2	Pop1	AU02-3104 x G00-3213(3)R2	Set2	Year_2016	Plains	Rep2	237	20	57	3328.88	42.87	19.37	NA
G13-2376R2	Pop1	AU02-3104 x G00-3213(3)R2	Set2	Year_2016	Plains	Rep2	228	19	55	2716.9	39.8	20.2	NA
G13-2379R2	Pop1	AU02-3104 x G00-3213(3)R2	Set2	Year_2016	Plains	Rep2	240	20	54	2938.82	40.71	20.79	NA
G13-2384R2	Pop1	AU02-3104 x G00-3213(3)R2	Set2	Year_2016	Plains	Rep2	232	19	59	3530.62	40.19	20.37	NA
G13-2385R2	Pop1	AU02-3104 x G00-3213(3)R2	Set2	Year_2016	Plains	Rep2	202	17	51	2925.38	39.89	20.8	NA
G13-2387R2	Pop1	AU02-3104 x G00-3213(3)R2	Set2	Year_2016	Plains	Rep2	208	17	57	3705.47	42.07	19.42	NA
G13-2389R2	Pop1	AU02-3104 x G00-3213(3)R2	Set2	Year_2016	Plains	Rep2	220	18	52	2777.43	41.6	20.22	NA
G13-2394R2	Pop1	AU02-3104 x G00-3213(3)R2	Set2	Year_2016	Plains	Rep2	211	17	60	2777.43	41.55	19.53	NA
G13-2400R2	Pop1	AU02-3104 x G00-3213(3)R2	Set2	Year_2016	Plains	Rep2	218	18	54	3301.97	39.8	20.3	NA
G13-2401R2	Pop1	AU02-3104 x G00-3213(3)R2	Set2	Year_2016	Plains	Rep2	231	19	58	3080.05	39.93	20.65	NA
G13-2407R2	Pop1	AU02-3104 x G00-3213(3)R2	Set2	Year_2016	Plains	Rep2	215	18	57	3194.38	39.42	20.29	NA
G13-2414R2	Pop1	AU02-3104 x G00-3213(3)R2	Set2	Year_2016	Plains	Rep2	225	19	52	3328.88	42	19.99	NA
G13-2418R2	Pop1	AU02-3104 x G00-3213(3)R2	Set2	Year_2016	Plains	Rep2	230	19	57	3140.57	39.91	20.73	NA
G13-2421R2	Pop1	AU02-3104 x G00-3213(3)R2	Set2	Year_2016	Plains	Rep2	205	17	54	3537.35	41.06	20.63	NA
G13-2453R2	Pop1	AU02-3104 x G00-3213(3)R2	Set2	Year_2016	Plains	Rep2	241	20	53	2992.62	41.31	20.06	NA
G13-2463R2	Pop1	AU02-3104 x G00-3213(3)R2	Set2	Year_2016	Plains	Rep2	229	19	56	3866.88	40.01	20.5	NA
G13-2529R2	Pop1	AU02-3104 x G00-3213(3)R2	Set2	Year_2016	Plains	Rep2	236	20	58	2797.6	41.41	19.76	NA
G13-2532R2	Pop1	AU02-3104 x G00-3213(3)R2	Set2	Year_2016	Plains	Rep2	217	18	55	2858.12	39.48	21.08	NA
G13-2533R2	Pop1	AU02-3104 x G00-3213(3)R2	Set2	Year_2016	Plains	Rep2	235	20	59	3335.6	40.12	20.41	NA
G13-2534R2	Pop1	AU02-3104 x G00-3213(3)R2	Set2	Year_2016	Plains	Rep2	201	17	50	3611.32	39.89	21	NA
G13-2536R2	Pop1	AU02-3104 x G00-3213(3)R2	Set2	Year_2016	Plains	Rep2	242	20	52	3080.05	39.29	21.56	NA
G13-2551R2	Pop1	AU02-3104 x G00-3213(3)R2	Set2	Year_2016	Plains	Rep2	243	20	51	2642.93	43.11	19.54	NA
G13-2579R2	Pop1	AU02-3104 x G00-3213(3)R2	Set2	Year_2016	Plains	Rep2	209	17	58	2447.9	43	19.91	NA
G13-2596R2	Pop1	AU02-3104 x G00-3213(3)R2	Set2	Year_2016	Plains	Rep2	222	18	50	2911.93	43.08	19.67	NA
G13-2607R2	Pop1	AU02-3104 x G00-3213(3)R2	Set2	Year_2016	Plains	Rep2	226	19	53	2582.4	41.59	19.52	NA
G13-2649R2	Pop1	AU02-3104 x G00-3213(3)R2	Set2	Year_2016	Plains	Rep2	206	17	55	2817.78	39.96	20.69	NA
G13-2650R2	Pop1	AU02-3104 x G00-3213(3)R2	Set2	Year_2016	Plains	Rep2	223	19	50	2965.72	41.4	20.46	NA
G13-2671R2	Pop1	AU02-3104 x G00-3213(3)R2	Set2	Year_2016	Plains	Rep2	219	18	53	3133.85	39.09	20.26	NA
G13-2672R2	Pop1	AU02-3104 x G00-3213(3)R2	Set2	Year_2016	Plains	Rep2	216	18	56	3275.07	39.93	20.89	NA
G13-2673R2	Pop1	AU02-3104 x G00-3213(3)R2	Set2	Year_2016	Plains	Rep2	214	18	58	3349.05	40.26	19.79	NA
G13-2679R2	Pop1	AU02-3104 x G00-3213(3)R2	Set2	Year_2016	Plains	Rep2	204	17	53	3133.85	41.89	20.13	NA
G13-2686R2	Pop1	AU02-3104 x G00-3213(3)R2	Set2	Year_2016	Plains	Rep2	207	17	56	3254.9	42.13	19.73	NA
AG7733	check	check	Set2	Year_2016	Plains	Rep3	325	23	52	3597.88	41.79	18.81	NA
AG7934	check	check	Set2	Year_2016	Plains	Rep3	315	22	57	3766	41.36	20.2	NA
G13-2304R2	Pop1	AU02-3104 x G00-3213(3)R2	Set2	Year_2016	Plains	Rep3	319	22	53	3443.2	39.91	20.77	NA
G13-2307R2	Pop1	AU02-3104 x G00-3213(3)R2	Set2	Year_2016	Plains	Rep3	305	21	54	2663.1	39.79	20.62	NA
G13-2312R2	Pop1	AU02-3104 x G00-3213(3)R2	Set2	Year_2016	Plains	Rep3	326	23	53	2938.82	40.8	20.73	NA
G13-2322R2	Pop1	AU02-3104 x G00-3213(3)R2	Set2	Year_2016	Plains	Rep3	335	24	59	2602.57	40.98	20.09	NA
G13-2324R2	Pop1	AU02-3104 x G00-3213(3)R2	Set2	Year_2016	Plains	Rep3	340	24	54	2858.12	41.04	19.23	NA
G13-2353R2	Pop1	AU02-3104 x G00-3213(3)R2	Set2	Year_2016	Plains	Rep3	341	24	53	2494.97	39.92	20.33	NA
G13-2355R2	Pop1	AU02-3104 x G00-3213(3)R2	Set2	Year_2016	Plains	Rep3	316	22	56	3100.22	40.44	20.71	NA
G13-2366R2	Pop1	AU02-3104 x G00-3213(3)R2	Set2	Year_2016	Plains	Rep3	336	24	58	2952.28	43.12	19.88	NA
G13-2368R2	Pop1	AU02-3104 x G00-3213(3)R2	Set2	Year_2016	Plains	Rep3	322	22	50	2965.72	42.25	20.6	NA
G13-2372R2	Pop1	AU02-3104 x G00-3213(3)R2	Set2	Year_2016	Plains	Rep3	323	23	50	3154.03	40.39	20.92	NA
G13-2375R2	Pop1	AU02-3104 x G00-3213(3)R2	Set2	Year_2016	Plains	Rep3	334	24	60	2965.72	43.65	19.39	NA
G13-2376R2	Pop1	AU02-3104 x G00-3213(3)R2	Set2	Year_2016	Plains	Rep3	303	21	52	2959	40.8	19.38	NA
G13-2379R2	Pop1	AU02-3104 x G00-3213(3)R2	Set2	Year_2016	Plains	Rep3	317	22	55	3382.68	40.08	20.91	NA
G13-2384R2	Pop1	AU02-3104 x G00-3213(3)R2	Set2	Year_2016	Plains	Rep3	310	21	59	3436.47	39.59	20.3	NA
G13-2385R2	Pop1	AU02-3104 x G00-3213(3)R2	Set2	Year_2016	Plains	Rep3	304	21	53	3154.03	39.76	21.04	NA
G13-2387R2	Pop1	AU02-3104 x G00-3213(3)R2	Set2	Year_2016	Plains	Rep3	312	22	60	3476.82	41.25	19.98	NA
G13-2389R2	Pop1	AU02-3104 x G00-3213(3)R2	Set2	Year_2016	Plains	Rep3	329	23	56	3221.28	40.37	20.98	NA
G13-2394R2	Pop1	AU02-3104 x G00-3213(3)R2	Set2	Year_2016	Plains	Rep3	337	24	57	2542.05	42.5	18.83	NA
G13-2400R2	Pop1	AU02-3104 x G00-3213(3)R2	Set2	Year_2016	Plains	Rep3	344	24	50	2985.9	39.92	20.12	NA
G13-2401R2	Pop1	AU02-3104 x G00-3213(3)R2	Set2	Year_2016	Plains	Rep3	332	23	59	3113.68	40.13	20.79	NA
G13-2407R2	Pop1	AU02-3104 x G00-3213(3)R2	Set2	Year_2016	Plains	Rep3	330	23	57	3322.15	39.55	20.6	NA
G13-2414R2	Pop1	AU02-3104 x G00-3213(3)R2	Set2	Year_2016	Plains	Rep3	307	21	56	3308.7	42.12	20.19	NA
G13-2418R2	Pop1	AU02-3104 x G00-3213(3)R2	Set2	Year_2016	Plains	Rep3	313	22	59	3275.07	40.97	20.02	NA
G13-2421R2	Pop1	AU02-3104 x G00-3213(3)R2	Set2	Year_2016	Plains	Rep3	309	21	58	3268.35	41.53	20.58	NA
G13-2453R2	Pop1	AU02-3104 x G00-3213(3)R2	Set2	Year_2016	Plains	Rep3	306	21	55	3228	40.95	20.21	NA
G13-2463R2	Pop1	AU02-3104 x G00-3213(3)R2	Set2	Year_2016	Plains	Rep3	339	24	55	2676.55	40.46	20.09	NA
G13-2529R2	Pop1	AU02-3104 x G00-3213(3)R2	Set2	Year_2016	Plains	Rep3	320	22	52	2911.93	41.24	19.75	NA
G13-2532R2	Pop1	AU02-3104 x G00-3213(3)R2	Set2	Year_2016	Plains	Rep3	333	23	60	2811.05	40.67	20.78	NA
G13-2533R2	Pop1	AU02-3104 x G00-3213(3)R2	Set2	Year_2016	Plains	Rep3	302	21	51	2952.28	40.43	20.86	NA
G13-2534R2	Pop1	AU02-3104 x G00-3213(3)R2	Set2	Year_2016	Plains	Rep3	342	24	52	3059.88	40.96	20.77	NA
G13-2536R2	Pop1	AU02-3104 x G00-3213(3)R2	Set2	Year_2016	Plains	Rep3	343	24	51	2649.65	39.62	21.2	NA
G13-2551R2	Pop1	AU02-3104 x G00-3213(3)R2	Set2	Year_2016	Plains	Rep3	301	21	50	2575.68	43.44	19.18	NA
G13-2579R2	Pop1	AU02-3104 x G00-3213(3)R2	Set2	Year_2016	Plains	Rep3	331	23	58	2589.12	42.68	19.81	NA
G13-2596R2	Pop1	AU02-3104 x G00-3213(3)R2	Set2	Year_2016	Plains	Rep3	314	22	58	3140.57	42.87	20.38	NA
G13-2607R2	Pop1	AU02-3104 x G00-3213(3)R2	Set2	Year_2016	Plains	Rep3	318	22	54	2925.38	41.67	19.68	NA
G13-2649R2	Pop1	AU02-3104 x G00-3213(3)R2	Set2	Year_2016	Plains	Rep3	328	23	55	2676.55	39.62	21.38	NA
G13-2650R2	Pop1	AU02-3104 x G00-3213(3)R2	Set2	Year_2016	Plains	Rep3	338	24	56	2609.3	41.54	20.78	NA
G13-2671R2	Pop1	AU02-3104 x G00-3213(3)R2	Set2	Year_2016	Plains	Rep3	321	22	51	3295.25	39.88	20.06	NA
G13-2672R2	Pop1	AU02-3104 x G00-3213(3)R2	Set2	Year_2016	Plains	Rep3	324	23	51	2757.25	40.46	20.67	NA
G13-2673R2	Pop1	AU02-3104 x G00-3213(3)R2	Set2	Year_2016	Plains	Rep3	327	23	54	3470.1	39.12	19.97	NA
G13-2679R2	Pop1	AU02-3104 x G00-3213(3)R2	Set2	Year_2016	Plains	Rep3	311	21	60	3207.82	41.85	20.16	NA
G13-2686R2	Pop1	AU02-3104 x G00-3213(3)R2	Set2	Year_2016	Plains	Rep3	308	21	57	3053.15	41.62	20.41	NA
AG6534	check	check	Set3	Year_2015	Athens	Rep1	131	3	9	2750.53	NA	NA	50
AG7733	check	check	Set3	Year_2015	Athens	Rep1	136	4	9	3369.22	NA	NA	56
G14-1523R2	Pop2	G10PR-10 x G10PR-56389R2	Set3	Year_2015	Athens	Rep1	122	2	1	3436.47	NA	NA	51
G14-1535R2	Pop2	G10PR-10 x G10PR-56389R2	Set3	Year_2015	Athens	Rep1	124	3	2	3221.28	NA	NA	55
G14-1536R2	Pop2	G10PR-10 x G10PR-56389R2	Set3	Year_2015	Athens	Rep1	123	3	1	3012.8	NA	NA	50
G14-1545R2	Pop2	G10PR-10 x G10PR-56389R2	Set3	Year_2015	Athens	Rep1	107	1	7	3349.05	NA	NA	50
G14-1546R2	Pop2	G10PR-10 x G10PR-56389R2	Set3	Year_2015	Athens	Rep1	120	2	3	3853.43	NA	NA	50
G14-1551R2	Pop2	G10PR-10 x G10PR-56389R2	Set3	Year_2015	Athens	Rep1	143	4	2	2972.45	NA	NA	50
G14-1552R2	Pop2	G10PR-10 x G10PR-56389R2	Set3	Year_2015	Athens	Rep1	127	3	5	3813.07	NA	NA	51
G14-1555R2	Pop2	G10PR-10 x G10PR-56389R2	Set3	Year_2015	Athens	Rep1	106	1	6	3032.97	NA	NA	50
G14-1558R2	Pop2	G10PR-10 x G10PR-56389R2	Set3	Year_2015	Athens	Rep1	135	4	10	3517.18	NA	NA	50
G14-1561R2	Pop2	G10PR-10 x G10PR-56389R2	Set3	Year_2015	Athens	Rep1	101	1	1	2521.88	NA	NA	52
G14-1566R2	Pop2	G10PR-10 x G10PR-56389R2	Set3	Year_2015	Athens	Rep1	130	3	8	2757.25	NA	NA	50
G14-1580R2	Pop2	G10PR-10 x G10PR-56389R2	Set3	Year_2015	Athens	Rep1	121	2	2	3591.15	NA	NA	50
G14-1590R2	Pop2	G10PR-10 x G10PR-56389R2	Set3	Year_2015	Athens	Rep1	137	4	8	2804.32	NA	NA	50
G14-1601R2	Pop2	G10PR-10 x G10PR-56389R2	Set3	Year_2015	Athens	Rep1	142	4	3	3389.4	NA	NA	53
G14-1615R2	Pop2	G10PR-10 x G10PR-56389R2	Set3	Year_2015	Athens	Rep1	109	1	9	3396.12	NA	NA	50
G14-1650R2	Pop2	G10PR-10 x G10PR-56389R2	Set3	Year_2015	Athens	Rep1	139	4	6	2279.78	NA	NA	45
G14-1663R2	Pop2	G10PR-10 x G10PR-56389R2	Set3	Year_2015	Athens	Rep1	104	1	4	2999.35	NA	NA	50
G14-1664R2	Pop2	G10PR-10 x G10PR-56389R2	Set3	Year_2015	Athens	Rep1	103	1	3	2858.12	NA	NA	50
G14-1665R2	Pop2	G10PR-10 x G10PR-56389R2	Set3	Year_2015	Athens	Rep1	133	3	11	3416.3	NA	NA	51
G14-1666R2	Pop2	G10PR-10 x G10PR-56389R2	Set3	Year_2015	Athens	Rep1	102	1	2	3093.5	NA	NA	52
G14-1668R2	Pop2	G10PR-10 x G10PR-56389R2	Set3	Year_2015	Athens	Rep1	140	4	5	2649.65	NA	NA	47
G14-1687R2	Pop2	G10PR-10 x G10PR-56389R2	Set3	Year_2015	Athens	Rep1	113	2	10	2905.2	NA	NA	50
G14-1688R2	Pop2	G10PR-10 x G10PR-56389R2	Set3	Year_2015	Athens	Rep1	138	4	7	2710.18	NA	NA	50
G14-1690R2	Pop2	G10PR-10 x G10PR-56389R2	Set3	Year_2015	Athens	Rep1	126	3	4	2481.53	NA	NA	50
G14-1694R2	Pop2	G10PR-10 x G10PR-56389R2	Set3	Year_2015	Athens	Rep1	118	2	5	3375.95	NA	NA	50
G14-1695R2	Pop2	G10PR-10 x G10PR-56389R2	Set3	Year_2015	Athens	Rep1	111	1	11	2737.07	NA	NA	50
G14-1696R2	Pop2	G10PR-10 x G10PR-56389R2	Set3	Year_2015	Athens	Rep1	116	2	7	3086.78	NA	NA	53
G14-1703R2	Pop2	G10PR-10 x G10PR-56389R2	Set3	Year_2015	Athens	Rep1	134	4	11	3416.3	NA	NA	50
G14-1709R2	Pop2	G10PR-10 x G10PR-56389R2	Set3	Year_2015	Athens	Rep1	110	1	10	2925.38	NA	NA	50
G14-1710R2	Pop2	G10PR-10 x G10PR-56389R2	Set3	Year_2015	Athens	Rep1	119	2	4	3241.45	NA	NA	50
G14-1746R2	Pop2	G10PR-10 x G10PR-56389R2	Set3	Year_2015	Athens	Rep1	129	3	7	3100.22	NA	NA	50
G14-1751R2	Pop2	G10PR-10 x G10PR-56389R2	Set3	Year_2015	Athens	Rep1	114	2	9	3369.22	NA	NA	50
G14-1768R2	Pop2	G10PR-10 x G10PR-56389R2	Set3	Year_2015	Athens	Rep1	117	2	6	3443.2	NA	NA	50
G14-1776R2	Pop2	G10PR-10 x G10PR-56389R2	Set3	Year_2015	Athens	Rep1	112	2	11	3006.07	NA	NA	50
G14-1779R2	Pop2	G10PR-10 x G10PR-56389R2	Set3	Year_2015	Athens	Rep1	125	3	3	3127.12	NA	NA	50
G14-1782R2	Pop2	G10PR-10 x G10PR-56389R2	Set3	Year_2015	Athens	Rep1	144	4	1	3813.07	NA	NA	56
G14-1790R2	Pop2	G10PR-10 x G10PR-56389R2	Set3	Year_2015	Athens	Rep1	132	3	10	3248.18	NA	NA	50
G14-1793R2	Pop2	G10PR-10 x G10PR-56389R2	Set3	Year_2015	Athens	Rep1	115	2	8	2515.15	NA	NA	50
G14-1799R2	Pop2	G10PR-10 x G10PR-56389R2	Set3	Year_2015	Athens	Rep1	141	4	4	2683.28	NA	NA	50
G14-1808R2	Pop2	G10PR-10 x G10PR-56389R2	Set3	Year_2015	Athens	Rep1	105	1	5	3066.6	NA	NA	50
G14-1811R2	Pop2	G10PR-10 x G10PR-56389R2	Set3	Year_2015	Athens	Rep1	128	3	6	3207.82	NA	NA	47
G14-1833R2	Pop2	G10PR-10 x G10PR-56389R2	Set3	Year_2015	Athens	Rep1	108	1	8	3497	NA	NA	50
AG6534	check	check	Set3	Year_2015	Athens	Rep2	201	5	1	3234.72	NA	NA	53
AG7733	check	check	Set3	Year_2015	Athens	Rep2	218	6	5	2616.03	NA	NA	54
G14-1523R2	Pop2	G10PR-10 x G10PR-56389R2	Set3	Year_2015	Athens	Rep2	238	8	7	3080.05	NA	NA	54
G14-1535R2	Pop2	G10PR-10 x G10PR-56389R2	Set3	Year_2015	Athens	Rep2	219	6	4	2494.97	NA	NA	53
G14-1536R2	Pop2	G10PR-10 x G10PR-56389R2	Set3	Year_2015	Athens	Rep2	203	5	3	2542.05	NA	NA	50
G14-1545R2	Pop2	G10PR-10 x G10PR-56389R2	Set3	Year_2015	Athens	Rep2	244	8	1	3476.82	NA	NA	50
G14-1546R2	Pop2	G10PR-10 x G10PR-56389R2	Set3	Year_2015	Athens	Rep2	227	7	5	3819.8	NA	NA	50
G14-1551R2	Pop2	G10PR-10 x G10PR-56389R2	Set3	Year_2015	Athens	Rep2	217	6	6	2730.35	NA	NA	50
G14-1552R2	Pop2	G10PR-10 x G10PR-56389R2	Set3	Year_2015	Athens	Rep2	231	7	9	3174.2	NA	NA	52
G14-1555R2	Pop2	G10PR-10 x G10PR-56389R2	Set3	Year_2015	Athens	Rep2	216	6	7	2582.4	NA	NA	52
G14-1558R2	Pop2	G10PR-10 x G10PR-56389R2	Set3	Year_2015	Athens	Rep2	208	5	8	2965.72	NA	NA	50
G14-1561R2	Pop2	G10PR-10 x G10PR-56389R2	Set3	Year_2015	Athens	Rep2	237	8	8	3187.65	NA	NA	55
G14-1566R2	Pop2	G10PR-10 x G10PR-56389R2	Set3	Year_2015	Athens	Rep2	234	8	11	3207.82	NA	NA	56
G14-1580R2	Pop2	G10PR-10 x G10PR-56389R2	Set3	Year_2015	Athens	Rep2	243	8	2	3335.6	NA	NA	50
G14-1590R2	Pop2	G10PR-10 x G10PR-56389R2	Set3	Year_2015	Athens	Rep2	226	7	4	2656.38	NA	NA	50
G14-1601R2	Pop2	G10PR-10 x G10PR-56389R2	Set3	Year_2015	Athens	Rep2	235	8	10	3766	NA	NA	57
G14-1615R2	Pop2	G10PR-10 x G10PR-56389R2	Set3	Year_2015	Athens	Rep2	209	5	9	3301.97	NA	NA	54
G14-1650R2	Pop2	G10PR-10 x G10PR-56389R2	Set3	Year_2015	Athens	Rep2	213	6	10	2972.45	NA	NA	50
G14-1663R2	Pop2	G10PR-10 x G10PR-56389R2	Set3	Year_2015	Athens	Rep2	224	7	2	3201.1	NA	NA	51
G14-1664R2	Pop2	G10PR-10 x G10PR-56389R2	Set3	Year_2015	Athens	Rep2	239	8	6	3039.7	NA	NA	53
G14-1665R2	Pop2	G10PR-10 x G10PR-56389R2	Set3	Year_2015	Athens	Rep2	214	6	9	3026.25	NA	NA	53
G14-1666R2	Pop2	G10PR-10 x G10PR-56389R2	Set3	Year_2015	Athens	Rep2	210	5	10	3423.03	NA	NA	51
G14-1668R2	Pop2	G10PR-10 x G10PR-56389R2	Set3	Year_2015	Athens	Rep2	242	8	3	2763.97	NA	NA	50
G14-1687R2	Pop2	G10PR-10 x G10PR-56389R2	Set3	Year_2015	Athens	Rep2	233	7	11	3113.68	NA	NA	54
G14-1688R2	Pop2	G10PR-10 x G10PR-56389R2	Set3	Year_2015	Athens	Rep2	205	5	5	2737.07	NA	NA	47
G14-1690R2	Pop2	G10PR-10 x G10PR-56389R2	Set3	Year_2015	Athens	Rep2	204	5	4	2353.75	NA	NA	47
G14-1694R2	Pop2	G10PR-10 x G10PR-56389R2	Set3	Year_2015	Athens	Rep2	229	7	7	2911.93	NA	NA	50
G14-1695R2	Pop2	G10PR-10 x G10PR-56389R2	Set3	Year_2015	Athens	Rep2	215	6	8	3100.22	NA	NA	54
G14-1696R2	Pop2	G10PR-10 x G10PR-56389R2	Set3	Year_2015	Athens	Rep2	222	6	1	3207.82	NA	NA	50
G14-1703R2	Pop2	G10PR-10 x G10PR-56389R2	Set3	Year_2015	Athens	Rep2	236	8	9	3080.05	NA	NA	53
G14-1709R2	Pop2	G10PR-10 x G10PR-56389R2	Set3	Year_2015	Athens	Rep2	211	5	11	3288.53	NA	NA	50
G14-1710R2	Pop2	G10PR-10 x G10PR-56389R2	Set3	Year_2015	Athens	Rep2	223	7	1	3214.55	NA	NA	51
G14-1746R2	Pop2	G10PR-10 x G10PR-56389R2	Set3	Year_2015	Athens	Rep2	220	6	3	3550.8	NA	NA	51
G14-1751R2	Pop2	G10PR-10 x G10PR-56389R2	Set3	Year_2015	Athens	Rep2	228	7	6	3228	NA	NA	52
G14-1768R2	Pop2	G10PR-10 x G10PR-56389R2	Set3	Year_2015	Athens	Rep2	241	8	4	3564.25	NA	NA	55
G14-1776R2	Pop2	G10PR-10 x G10PR-56389R2	Set3	Year_2015	Athens	Rep2	207	5	7	2797.6	NA	NA	50
G14-1779R2	Pop2	G10PR-10 x G10PR-56389R2	Set3	Year_2015	Athens	Rep2	202	5	2	3133.85	NA	NA	52
G14-1782R2	Pop2	G10PR-10 x G10PR-56389R2	Set3	Year_2015	Athens	Rep2	206	5	6	3786.18	NA	NA	56
G14-1790R2	Pop2	G10PR-10 x G10PR-56389R2	Set3	Year_2015	Athens	Rep2	225	7	3	2293.22	NA	NA	50
G14-1793R2	Pop2	G10PR-10 x G10PR-56389R2	Set3	Year_2015	Athens	Rep2	230	7	8	2622.75	NA	NA	50
G14-1799R2	Pop2	G10PR-10 x G10PR-56389R2	Set3	Year_2015	Athens	Rep2	212	6	11	3194.38	NA	NA	50
G14-1808R2	Pop2	G10PR-10 x G10PR-56389R2	Set3	Year_2015	Athens	Rep2	221	6	2	2790.88	NA	NA	50
G14-1811R2	Pop2	G10PR-10 x G10PR-56389R2	Set3	Year_2015	Athens	Rep2	240	8	5	3308.7	NA	NA	52
G14-1833R2	Pop2	G10PR-10 x G10PR-56389R2	Set3	Year_2015	Athens	Rep2	232	7	10	3739.1	NA	NA	54
AG6534	check	check	Set4	Year_2015	Athens	Rep1	122	2	12	2817.78	NA	NA	50
AG7733	check	check	Set4	Year_2015	Athens	Rep1	114	2	20	3167.47	NA	NA	56
G14-1532R2	Pop2	G10PR-10 x G10PR-56389R2	Set4	Year_2015	Athens	Rep1	109	1	20	3059.88	NA	NA	56
G14-1541R2	Pop2	G10PR-10 x G10PR-56389R2	Set4	Year_2015	Athens	Rep1	105	1	16	3228	NA	NA	52
G14-1542R2	Pop2	G10PR-10 x G10PR-56389R2	Set4	Year_2015	Athens	Rep1	103	1	14	2723.62	NA	NA	50
G14-1544R2	Pop2	G10PR-10 x G10PR-56389R2	Set4	Year_2015	Athens	Rep1	108	1	19	2858.12	NA	NA	56
G14-1581R2	Pop2	G10PR-10 x G10PR-56389R2	Set4	Year_2015	Athens	Rep1	137	4	19	3423.03	NA	NA	55
G14-1582R2	Pop2	G10PR-10 x G10PR-56389R2	Set4	Year_2015	Athens	Rep1	123	3	12	3544.07	NA	NA	53
G14-1586R2	Pop2	G10PR-10 x G10PR-56389R2	Set4	Year_2015	Athens	Rep1	131	3	20	3712.2	NA	NA	54
G14-1587R2	Pop2	G10PR-10 x G10PR-56389R2	Set4	Year_2015	Athens	Rep1	113	2	21	3106.95	NA	NA	55
G14-1592R2	Pop2	G10PR-10 x G10PR-56389R2	Set4	Year_2015	Athens	Rep1	144	4	12	3275.07	NA	NA	55
G14-1597R2	Pop2	G10PR-10 x G10PR-56389R2	Set4	Year_2015	Athens	Rep1	120	2	14	3537.35	NA	NA	54
G14-1599R2	Pop2	G10PR-10 x G10PR-56389R2	Set4	Year_2015	Athens	Rep1	102	1	13	3281.8	NA	NA	53
G14-1603R2	Pop2	G10PR-10 x G10PR-56389R2	Set4	Year_2015	Athens	Rep1	104	1	15	2474.8	NA	NA	53
G14-1605R2	Pop2	G10PR-10 x G10PR-56389R2	Set4	Year_2015	Athens	Rep1	142	4	14	3180.93	NA	NA	54
G14-1607R2	Pop2	G10PR-10 x G10PR-56389R2	Set4	Year_2015	Athens	Rep1	140	4	16	3678.57	NA	NA	55
G14-1608R2	Pop2	G10PR-10 x G10PR-56389R2	Set4	Year_2015	Athens	Rep1	106	1	17	2945.55	NA	NA	53
G14-1610R2	Pop2	G10PR-10 x G10PR-56389R2	Set4	Year_2015	Athens	Rep1	125	3	14	4014.82	NA	NA	55
G14-1616R2	Pop2	G10PR-10 x G10PR-56389R2	Set4	Year_2015	Athens	Rep1	129	3	18	3732.38	NA	NA	56
G14-1629R2	Pop2	G10PR-10 x G10PR-56389R2	Set4	Year_2015	Athens	Rep1	115	2	19	3779.45	NA	NA	56
G14-1631R2	Pop2	G10PR-10 x G10PR-56389R2	Set4	Year_2015	Athens	Rep1	118	2	16	3476.82	NA	NA	51
G14-1632R2	Pop2	G10PR-10 x G10PR-56389R2	Set4	Year_2015	Athens	Rep1	124	3	13	3826.53	NA	NA	55
G14-1633R2	Pop2	G10PR-10 x G10PR-56389R2	Set4	Year_2015	Athens	Rep1	133	3	22	3315.43	NA	NA	54
G14-1640R2	Pop2	G10PR-10 x G10PR-56389R2	Set4	Year_2015	Athens	Rep1	127	3	16	3564.25	NA	NA	54
G14-1652R2	Pop2	G10PR-10 x G10PR-56389R2	Set4	Year_2015	Athens	Rep1	119	2	15	3611.32	NA	NA	55
G14-1653R2	Pop2	G10PR-10 x G10PR-56389R2	Set4	Year_2015	Athens	Rep1	138	4	18	2891.75	NA	NA	50
G14-1654R2	Pop2	G10PR-10 x G10PR-56389R2	Set4	Year_2015	Athens	Rep1	111	1	22	2891.75	NA	NA	52
G14-1657R2	Pop2	G10PR-10 x G10PR-56389R2	Set4	Year_2015	Athens	Rep1	121	2	13	3658.4	NA	NA	53
G14-1659R2	Pop2	G10PR-10 x G10PR-56389R2	Set4	Year_2015	Athens	Rep1	130	3	19	4008.1	NA	NA	67
G14-1661R2	Pop2	G10PR-10 x G10PR-56389R2	Set4	Year_2015	Athens	Rep1	112	2	22	3813.07	NA	NA	68
G14-1676R2	Pop2	G10PR-10 x G10PR-56389R2	Set4	Year_2015	Athens	Rep1	101	1	12	2165.45	NA	NA	52
G14-1707R2	Pop2	G10PR-10 x G10PR-56389R2	Set4	Year_2015	Athens	Rep1	134	4	22	2925.38	NA	NA	50
G14-1716R2	Pop2	G10PR-10 x G10PR-56389R2	Set4	Year_2015	Athens	Rep1	132	3	21	3503.72	NA	NA	54
G14-1737R2	Pop2	G10PR-10 x G10PR-56389R2	Set4	Year_2015	Athens	Rep1	143	4	13	3059.88	NA	NA	53
G14-1747R2	Pop2	G10PR-10 x G10PR-56389R2	Set4	Year_2015	Athens	Rep1	110	1	21	2763.97	NA	NA	52
G14-1752R2	Pop2	G10PR-10 x G10PR-56389R2	Set4	Year_2015	Athens	Rep1	135	4	21	3799.62	NA	NA	53
G14-1753R2	Pop2	G10PR-10 x G10PR-56389R2	Set4	Year_2015	Athens	Rep1	116	2	18	3732.38	NA	NA	56
G14-1755R2	Pop2	G10PR-10 x G10PR-56389R2	Set4	Year_2015	Athens	Rep1	139	4	17	3779.45	NA	NA	54
G14-1758R2	Pop2	G10PR-10 x G10PR-56389R2	Set4	Year_2015	Athens	Rep1	141	4	15	2286.5	NA	NA	60
G14-1795R2	Pop2	G10PR-10 x G10PR-56389R2	Set4	Year_2015	Athens	Rep1	128	3	17	3221.28	NA	NA	54
G14-1796R2	Pop2	G10PR-10 x G10PR-56389R2	Set4	Year_2015	Athens	Rep1	136	4	20	3644.95	NA	NA	53
G14-1801R2	Pop2	G10PR-10 x G10PR-56389R2	Set4	Year_2015	Athens	Rep1	107	1	18	3295.25	NA	NA	55
G14-1817R2	Pop2	G10PR-10 x G10PR-56389R2	Set4	Year_2015	Athens	Rep1	126	3	15	3342.32	NA	NA	53
G14-1819R2	Pop2	G10PR-10 x G10PR-56389R2	Set4	Year_2015	Athens	Rep1	117	2	17	3523.9	NA	NA	56
AG6534	check	check	Set4	Year_2015	Athens	Rep2	227	7	16	2911.93	NA	NA	55
AG7733	check	check	Set4	Year_2015	Athens	Rep2	201	5	12	3140.57	NA	NA	56
G14-1532R2	Pop2	G10PR-10 x G10PR-56389R2	Set4	Year_2015	Athens	Rep2	243	8	13	3772.72	NA	NA	59
G14-1541R2	Pop2	G10PR-10 x G10PR-56389R2	Set4	Year_2015	Athens	Rep2	225	7	14	3369.22	NA	NA	56
G14-1542R2	Pop2	G10PR-10 x G10PR-56389R2	Set4	Year_2015	Athens	Rep2	229	7	18	3544.07	NA	NA	54
G14-1544R2	Pop2	G10PR-10 x G10PR-56389R2	Set4	Year_2015	Athens	Rep2	226	7	15	3544.07	NA	NA	60
G14-1581R2	Pop2	G10PR-10 x G10PR-56389R2	Set4	Year_2015	Athens	Rep2	218	6	16	3228	NA	NA	57
G14-1582R2	Pop2	G10PR-10 x G10PR-56389R2	Set4	Year_2015	Athens	Rep2	223	7	12	3080.05	NA	NA	54
G14-1586R2	Pop2	G10PR-10 x G10PR-56389R2	Set4	Year_2015	Athens	Rep2	235	8	21	3396.12	NA	NA	60
G14-1587R2	Pop2	G10PR-10 x G10PR-56389R2	Set4	Year_2015	Athens	Rep2	238	8	18	3490.28	NA	NA	60
G14-1592R2	Pop2	G10PR-10 x G10PR-56389R2	Set4	Year_2015	Athens	Rep2	214	6	20	3961.03	NA	NA	56
G14-1597R2	Pop2	G10PR-10 x G10PR-56389R2	Set4	Year_2015	Athens	Rep2	213	6	21	3611.32	NA	NA	56
G14-1599R2	Pop2	G10PR-10 x G10PR-56389R2	Set4	Year_2015	Athens	Rep2	239	8	17	3409.57	NA	NA	59
G14-1603R2	Pop2	G10PR-10 x G10PR-56389R2	Set4	Year_2015	Athens	Rep2	203	5	14	2952.28	NA	NA	55
G14-1605R2	Pop2	G10PR-10 x G10PR-56389R2	Set4	Year_2015	Athens	Rep2	244	8	12	3315.43	NA	NA	60
G14-1607R2	Pop2	G10PR-10 x G10PR-56389R2	Set4	Year_2015	Athens	Rep2	208	5	19	3490.28	NA	NA	55
G14-1608R2	Pop2	G10PR-10 x G10PR-56389R2	Set4	Year_2015	Athens	Rep2	234	8	22	3335.6	NA	NA	55
G14-1610R2	Pop2	G10PR-10 x G10PR-56389R2	Set4	Year_2015	Athens	Rep2	204	5	15	4135.88	NA	NA	57
G14-1616R2	Pop2	G10PR-10 x G10PR-56389R2	Set4	Year_2015	Athens	Rep2	224	7	13	3301.97	NA	NA	61
G14-1629R2	Pop2	G10PR-10 x G10PR-56389R2	Set4	Year_2015	Athens	Rep2	233	7	22	3550.8	NA	NA	56
G14-1631R2	Pop2	G10PR-10 x G10PR-56389R2	Set4	Year_2015	Athens	Rep2	220	6	14	3456.65	NA	NA	54
G14-1632R2	Pop2	G10PR-10 x G10PR-56389R2	Set4	Year_2015	Athens	Rep2	211	5	22	3779.45	NA	NA	56
G14-1633R2	Pop2	G10PR-10 x G10PR-56389R2	Set4	Year_2015	Athens	Rep2	228	7	17	3718.93	NA	NA	57
G14-1640R2	Pop2	G10PR-10 x G10PR-56389R2	Set4	Year_2015	Athens	Rep2	230	7	19	3059.88	NA	NA	55
G14-1652R2	Pop2	G10PR-10 x G10PR-56389R2	Set4	Year_2015	Athens	Rep2	212	6	22	3806.35	NA	NA	56
G14-1653R2	Pop2	G10PR-10 x G10PR-56389R2	Set4	Year_2015	Athens	Rep2	221	6	13	3389.4	NA	NA	53
G14-1654R2	Pop2	G10PR-10 x G10PR-56389R2	Set4	Year_2015	Athens	Rep2	231	7	20	3248.18	NA	NA	54
G14-1657R2	Pop2	G10PR-10 x G10PR-56389R2	Set4	Year_2015	Athens	Rep2	206	5	17	3241.45	NA	NA	56
G14-1659R2	Pop2	G10PR-10 x G10PR-56389R2	Set4	Year_2015	Athens	Rep2	209	5	20	3954.3	NA	NA	66
G14-1661R2	Pop2	G10PR-10 x G10PR-56389R2	Set4	Year_2015	Athens	Rep2	207	5	18	3577.7	NA	NA	68
G14-1676R2	Pop2	G10PR-10 x G10PR-56389R2	Set4	Year_2015	Athens	Rep2	217	6	17	2831.22	NA	NA	55
G14-1707R2	Pop2	G10PR-10 x G10PR-56389R2	Set4	Year_2015	Athens	Rep2	205	5	16	2858.12	NA	NA	52
G14-1716R2	Pop2	G10PR-10 x G10PR-56389R2	Set4	Year_2015	Athens	Rep2	215	6	19	3671.85	NA	NA	56
G14-1737R2	Pop2	G10PR-10 x G10PR-56389R2	Set4	Year_2015	Athens	Rep2	202	5	13	3349.05	NA	NA	54
G14-1747R2	Pop2	G10PR-10 x G10PR-56389R2	Set4	Year_2015	Athens	Rep2	240	8	16	3080.05	NA	NA	59
G14-1752R2	Pop2	G10PR-10 x G10PR-56389R2	Set4	Year_2015	Athens	Rep2	216	6	18	3550.8	NA	NA	55
G14-1753R2	Pop2	G10PR-10 x G10PR-56389R2	Set4	Year_2015	Athens	Rep2	237	8	19	3745.82	NA	NA	60
G14-1755R2	Pop2	G10PR-10 x G10PR-56389R2	Set4	Year_2015	Athens	Rep2	242	8	14	3476.82	NA	NA	59
G14-1758R2	Pop2	G10PR-10 x G10PR-56389R2	Set4	Year_2015	Athens	Rep2	232	7	21	2790.88	NA	NA	54
G14-1795R2	Pop2	G10PR-10 x G10PR-56389R2	Set4	Year_2015	Athens	Rep2	219	6	15	3174.2	NA	NA	55
G14-1796R2	Pop2	G10PR-10 x G10PR-56389R2	Set4	Year_2015	Athens	Rep2	210	5	21	3718.93	NA	NA	53
G14-1801R2	Pop2	G10PR-10 x G10PR-56389R2	Set4	Year_2015	Athens	Rep2	241	8	15	4014.82	NA	NA	60
G14-1817R2	Pop2	G10PR-10 x G10PR-56389R2	Set4	Year_2015	Athens	Rep2	236	8	20	3604.6	NA	NA	59
G14-1819R2	Pop2	G10PR-10 x G10PR-56389R2	Set4	Year_2015	Athens	Rep2	222	6	12	3053.15	NA	NA	56
AG6534	check	check	Set3	Year_2016	Athens	Rep1	111	1	69	4216.57	42.11	19.32	48
AG7733	check	check	Set3	Year_2016	Athens	Rep1	127	3	63	3658.4	41.24	18.76	51
G14-1523R2	Pop2	G10PR-10 x G10PR-56389R2	Set3	Year_2016	Athens	Rep1	134	4	69	3557.53	42.22	18.35	45
G14-1535R2	Pop2	G10PR-10 x G10PR-56389R2	Set3	Year_2016	Athens	Rep1	144	4	59	3382.68	41.67	19.43	53
G14-1536R2	Pop2	G10PR-10 x G10PR-56389R2	Set3	Year_2016	Athens	Rep1	141	4	62	3436.47	41.75	19.54	48
G14-1545R2	Pop2	G10PR-10 x G10PR-56389R2	Set3	Year_2016	Athens	Rep1	120	2	61	3772.72	40.12	18.54	47
G14-1546R2	Pop2	G10PR-10 x G10PR-56389R2	Set3	Year_2016	Athens	Rep1	138	4	65	3671.85	42.54	19.53	48
G14-1551R2	Pop2	G10PR-10 x G10PR-56389R2	Set3	Year_2016	Athens	Rep1	142	4	61	3732.38	40.67	19.6	48
G14-1552R2	Pop2	G10PR-10 x G10PR-56389R2	Set3	Year_2016	Athens	Rep1	121	2	60	3510.45	41.71	18.43	47
G14-1555R2	Pop2	G10PR-10 x G10PR-56389R2	Set3	Year_2016	Athens	Rep1	139	4	64	3544.07	42.86	19.4	52
G14-1558R2	Pop2	G10PR-10 x G10PR-56389R2	Set3	Year_2016	Athens	Rep1	132	3	68	4156.05	37.59	19.78	48
G14-1561R2	Pop2	G10PR-10 x G10PR-56389R2	Set3	Year_2016	Athens	Rep1	131	3	67	3080.05	41.26	19.11	48
G14-1566R2	Pop2	G10PR-10 x G10PR-56389R2	Set3	Year_2016	Athens	Rep1	129	3	65	3819.8	39.11	19.67	46
G14-1580R2	Pop2	G10PR-10 x G10PR-56389R2	Set3	Year_2016	Athens	Rep1	109	1	67	2922.01	39.11	19.32	46
G14-1590R2	Pop2	G10PR-10 x G10PR-56389R2	Set3	Year_2016	Athens	Rep1	110	1	68	4028.28	41.32	17.69	46
G14-1601R2	Pop2	G10PR-10 x G10PR-56389R2	Set3	Year_2016	Athens	Rep1	125	3	61	3308.7	44.02	18.18	49
G14-1615R2	Pop2	G10PR-10 x G10PR-56389R2	Set3	Year_2016	Athens	Rep1	140	4	63	3739.1	44.7	19.19	49
G14-1650R2	Pop2	G10PR-10 x G10PR-56389R2	Set3	Year_2016	Athens	Rep1	126	3	62	3053.15	41.95	19.27	47
G14-1663R2	Pop2	G10PR-10 x G10PR-56389R2	Set3	Year_2016	Athens	Rep1	105	1	63	3170.82	38.84	20.46	51
G14-1664R2	Pop2	G10PR-10 x G10PR-56389R2	Set3	Year_2016	Athens	Rep1	101	1	59	3016.16	40.71	18.93	48
G14-1665R2	Pop2	G10PR-10 x G10PR-56389R2	Set3	Year_2016	Athens	Rep1	123	3	59	3315.43	42.62	18.22	44
G14-1666R2	Pop2	G10PR-10 x G10PR-56389R2	Set3	Year_2016	Athens	Rep1	117	2	64	3517.18	43.11	17.49	47
G14-1668R2	Pop2	G10PR-10 x G10PR-56389R2	Set3	Year_2016	Athens	Rep1	136	4	67	3833.25	39.64	19.27	48
G14-1687R2	Pop2	G10PR-10 x G10PR-56389R2	Set3	Year_2016	Athens	Rep1	104	1	62	4082.07	38.69	19.9	51
G14-1688R2	Pop2	G10PR-10 x G10PR-56389R2	Set3	Year_2016	Athens	Rep1	116	2	65	3349.05	41.55	18.6	47
G14-1690R2	Pop2	G10PR-10 x G10PR-56389R2	Set3	Year_2016	Athens	Rep1	102	1	60	4418.32	39.35	18.69	50
G14-1694R2	Pop2	G10PR-10 x G10PR-56389R2	Set3	Year_2016	Athens	Rep1	135	4	68	3631.5	38.85	20.51	48
G14-1695R2	Pop2	G10PR-10 x G10PR-56389R2	Set3	Year_2016	Athens	Rep1	128	3	64	3544.07	41.39	19.17	48
G14-1696R2	Pop2	G10PR-10 x G10PR-56389R2	Set3	Year_2016	Athens	Rep1	130	3	66	4162.77	39.54	20.25	46
G14-1703R2	Pop2	G10PR-10 x G10PR-56389R2	Set3	Year_2016	Athens	Rep1	106	1	64	4230.02	39.66	19.98	47
G14-1709R2	Pop2	G10PR-10 x G10PR-56389R2	Set3	Year_2016	Athens	Rep1	124	3	60	3402.85	42.25	18.48	49
G14-1710R2	Pop2	G10PR-10 x G10PR-56389R2	Set3	Year_2016	Athens	Rep1	108	1	66	2619.39	38.07	20.44	47
G14-1746R2	Pop2	G10PR-10 x G10PR-56389R2	Set3	Year_2016	Athens	Rep1	122	2	59	3947.57	41.03	18.92	48
G14-1751R2	Pop2	G10PR-10 x G10PR-56389R2	Set3	Year_2016	Athens	Rep1	114	2	67	2901.84	41.17	19.16	49
G14-1768R2	Pop2	G10PR-10 x G10PR-56389R2	Set3	Year_2016	Athens	Rep1	119	2	62	4351.07	43.23	17.9	47
G14-1776R2	Pop2	G10PR-10 x G10PR-56389R2	Set3	Year_2016	Athens	Rep1	118	2	63	2774.06	41.12	18.88	47
G14-1779R2	Pop2	G10PR-10 x G10PR-56389R2	Set3	Year_2016	Athens	Rep1	107	1	65	3786.18	40.49	18.89	45
G14-1782R2	Pop2	G10PR-10 x G10PR-56389R2	Set3	Year_2016	Athens	Rep1	137	4	66	3759.28	41.67	18.74	51
G14-1790R2	Pop2	G10PR-10 x G10PR-56389R2	Set3	Year_2016	Athens	Rep1	115	2	66	4008.1	39.87	19.3	48
G14-1793R2	Pop2	G10PR-10 x G10PR-56389R2	Set3	Year_2016	Athens	Rep1	103	1	61	4371.25	40.44	19.03	50
G14-1799R2	Pop2	G10PR-10 x G10PR-56389R2	Set3	Year_2016	Athens	Rep1	133	3	69	2811.05	39.15	19.68	48
G14-1808R2	Pop2	G10PR-10 x G10PR-56389R2	Set3	Year_2016	Athens	Rep1	143	4	60	3517.18	41.05	18.58	49
G14-1811R2	Pop2	G10PR-10 x G10PR-56389R2	Set3	Year_2016	Athens	Rep1	112	2	69	3833.25	40.62	19.4	46
G14-1833R2	Pop2	G10PR-10 x G10PR-56389R2	Set3	Year_2016	Athens	Rep1	113	2	68	4149.32	41.88	19.34	50
AG6534	check	check	Set3	Year_2016	Athens	Rep2	223	7	59	3436.47	42.18	20.37	49
AG7733	check	check	Set3	Year_2016	Athens	Rep2	216	6	65	3127.12	41.35	19.66	53
G14-1523R2	Pop2	G10PR-10 x G10PR-56389R2	Set3	Year_2016	Athens	Rep2	210	5	68	3954.3	41.51	19.26	47
G14-1535R2	Pop2	G10PR-10 x G10PR-56389R2	Set3	Year_2016	Athens	Rep2	235	8	68	2797.6	42.38	18.6	54
G14-1536R2	Pop2	G10PR-10 x G10PR-56389R2	Set3	Year_2016	Athens	Rep2	230	7	66	2817.78	42.7	18.99	52
G14-1545R2	Pop2	G10PR-10 x G10PR-56389R2	Set3	Year_2016	Athens	Rep2	212	6	69	3214.55	41.07	19.47	46
G14-1546R2	Pop2	G10PR-10 x G10PR-56389R2	Set3	Year_2016	Athens	Rep2	208	5	66	3826.53	43.21	19.61	48
G14-1551R2	Pop2	G10PR-10 x G10PR-56389R2	Set3	Year_2016	Athens	Rep2	241	8	62	2750.53	42.81	18.89	47
G14-1552R2	Pop2	G10PR-10 x G10PR-56389R2	Set3	Year_2016	Athens	Rep2	221	6	60	3093.5	43.43	19.46	51
G14-1555R2	Pop2	G10PR-10 x G10PR-56389R2	Set3	Year_2016	Athens	Rep2	244	8	59	2421	42.93	19.57	53
G14-1558R2	Pop2	G10PR-10 x G10PR-56389R2	Set3	Year_2016	Athens	Rep2	211	5	69	3591.15	38.26	20.08	47
G14-1561R2	Pop2	G10PR-10 x G10PR-56389R2	Set3	Year_2016	Athens	Rep2	217	6	64	2985.9	42.98	18.66	50
G14-1566R2	Pop2	G10PR-10 x G10PR-56389R2	Set3	Year_2016	Athens	Rep2	222	6	59	3180.93	41.33	18.99	49
G14-1580R2	Pop2	G10PR-10 x G10PR-56389R2	Set3	Year_2016	Athens	Rep2	237	8	66	2609.3	43.83	18.1	49
G14-1590R2	Pop2	G10PR-10 x G10PR-56389R2	Set3	Year_2016	Athens	Rep2	213	6	68	2918.65	43.32	18.23	48
G14-1601R2	Pop2	G10PR-10 x G10PR-56389R2	Set3	Year_2016	Athens	Rep2	220	6	61	3066.6	43.5	18.75	52
G14-1615R2	Pop2	G10PR-10 x G10PR-56389R2	Set3	Year_2016	Athens	Rep2	215	6	66	3147.3	44.09	19.61	49
G14-1650R2	Pop2	G10PR-10 x G10PR-56389R2	Set3	Year_2016	Athens	Rep2	238	8	65	2494.97	43.41	18.93	46
G14-1663R2	Pop2	G10PR-10 x G10PR-56389R2	Set3	Year_2016	Athens	Rep2	205	5	63	3416.3	41.28	19.8	52
G14-1664R2	Pop2	G10PR-10 x G10PR-56389R2	Set3	Year_2016	Athens	Rep2	229	7	65	2837.95	44.15	18.73	50
G14-1665R2	Pop2	G10PR-10 x G10PR-56389R2	Set3	Year_2016	Athens	Rep2	240	8	63	2696.72	44.19	18.09	45
G14-1666R2	Pop2	G10PR-10 x G10PR-56389R2	Set3	Year_2016	Athens	Rep2	239	8	64	2663.1	44.58	18.07	47
G14-1668R2	Pop2	G10PR-10 x G10PR-56389R2	Set3	Year_2016	Athens	Rep2	206	5	64	3429.75	40.6	19.31	48
G14-1687R2	Pop2	G10PR-10 x G10PR-56389R2	Set3	Year_2016	Athens	Rep2	209	5	67	3772.72	40.49	20.43	49
G14-1688R2	Pop2	G10PR-10 x G10PR-56389R2	Set3	Year_2016	Athens	Rep2	214	6	67	3106.95	42.78	18.89	48
G14-1690R2	Pop2	G10PR-10 x G10PR-56389R2	Set3	Year_2016	Athens	Rep2	224	7	60	2932.1	41.23	19.28	51
G14-1694R2	Pop2	G10PR-10 x G10PR-56389R2	Set3	Year_2016	Athens	Rep2	242	8	61	2837.95	39.61	20.89	47
G14-1695R2	Pop2	G10PR-10 x G10PR-56389R2	Set3	Year_2016	Athens	Rep2	227	7	63	2790.88	42.74	18.25	54
G14-1696R2	Pop2	G10PR-10 x G10PR-56389R2	Set3	Year_2016	Athens	Rep2	202	5	60	3362.5	39.06	20.51	48
G14-1703R2	Pop2	G10PR-10 x G10PR-56389R2	Set3	Year_2016	Athens	Rep2	203	5	61	3180.93	40.34	20.27	47
G14-1709R2	Pop2	G10PR-10 x G10PR-56389R2	Set3	Year_2016	Athens	Rep2	231	7	67	2952.28	43.65	18.4	53
G14-1710R2	Pop2	G10PR-10 x G10PR-56389R2	Set3	Year_2016	Athens	Rep2	234	8	69	2743.8	41.97	20.14	45
G14-1746R2	Pop2	G10PR-10 x G10PR-56389R2	Set3	Year_2016	Athens	Rep2	201	5	59	3147.3	41.4	19.33	48
G14-1751R2	Pop2	G10PR-10 x G10PR-56389R2	Set3	Year_2016	Athens	Rep2	232	7	68	3046.43	40.8	20.17	48
G14-1768R2	Pop2	G10PR-10 x G10PR-56389R2	Set3	Year_2016	Athens	Rep2	204	5	62	3591.15	43.9	19.03	50
G14-1776R2	Pop2	G10PR-10 x G10PR-56389R2	Set3	Year_2016	Athens	Rep2	225	7	61	2824.5	42.68	20	47
G14-1779R2	Pop2	G10PR-10 x G10PR-56389R2	Set3	Year_2016	Athens	Rep2	219	6	62	2858.12	42.56	19.82	50
G14-1782R2	Pop2	G10PR-10 x G10PR-56389R2	Set3	Year_2016	Athens	Rep2	233	7	69	2642.93	41.21	19.16	54
G14-1790R2	Pop2	G10PR-10 x G10PR-56389R2	Set3	Year_2016	Athens	Rep2	228	7	64	2703.45	40.88	19.45	50
G14-1793R2	Pop2	G10PR-10 x G10PR-56389R2	Set3	Year_2016	Athens	Rep2	207	5	65	3826.53	43.02	19.57	52
G14-1799R2	Pop2	G10PR-10 x G10PR-56389R2	Set3	Year_2016	Athens	Rep2	236	8	67	2542.05	42.19	19.46	49
G14-1808R2	Pop2	G10PR-10 x G10PR-56389R2	Set3	Year_2016	Athens	Rep2	226	7	62	2737.07	41.46	18.74	52
G14-1811R2	Pop2	G10PR-10 x G10PR-56389R2	Set3	Year_2016	Athens	Rep2	218	6	63	3012.8	42.8	20.02	44
G14-1833R2	Pop2	G10PR-10 x G10PR-56389R2	Set3	Year_2016	Athens	Rep2	243	8	60	2763.97	44.02	19.04	51
AG6534	check	check	Set3	Year_2016	Athens	Rep3	322	10	59	3584.43	44.56	19.59	51
AG7733	check	check	Set3	Year_2016	Athens	Rep3	309	9	67	3369.22	41.11	19.41	51
G14-1523R2	Pop2	G10PR-10 x G10PR-56389R2	Set3	Year_2016	Athens	Rep3	314	10	67	3382.68	41.39	18.9	50
G14-1535R2	Pop2	G10PR-10 x G10PR-56389R2	Set3	Year_2016	Athens	Rep3	340	12	63	2777.43	41.14	19.51	54
G14-1536R2	Pop2	G10PR-10 x G10PR-56389R2	Set3	Year_2016	Athens	Rep3	338	12	65	2696.72	43.27	18.74	52
G14-1545R2	Pop2	G10PR-10 x G10PR-56389R2	Set3	Year_2016	Athens	Rep3	335	12	68	2521.88	41.48	19.05	47
G14-1546R2	Pop2	G10PR-10 x G10PR-56389R2	Set3	Year_2016	Athens	Rep3	306	9	64	3510.45	43.03	19.53	48
G14-1551R2	Pop2	G10PR-10 x G10PR-56389R2	Set3	Year_2016	Athens	Rep3	313	10	68	2985.9	41.1	19.77	49
G14-1552R2	Pop2	G10PR-10 x G10PR-56389R2	Set3	Year_2016	Athens	Rep3	334	12	69	2562.22	42.82	19.59	52
G14-1555R2	Pop2	G10PR-10 x G10PR-56389R2	Set3	Year_2016	Athens	Rep3	318	10	63	3268.35	43.12	19.04	52
G14-1558R2	Pop2	G10PR-10 x G10PR-56389R2	Set3	Year_2016	Athens	Rep3	332	11	68	3476.82	38.66	19.92	49
G14-1561R2	Pop2	G10PR-10 x G10PR-56389R2	Set3	Year_2016	Athens	Rep3	308	9	66	3174.2	40.82	19.57	54
G14-1566R2	Pop2	G10PR-10 x G10PR-56389R2	Set3	Year_2016	Athens	Rep3	303	9	61	3375.95	39.62	20.06	51
G14-1580R2	Pop2	G10PR-10 x G10PR-56389R2	Set3	Year_2016	Athens	Rep3	328	11	64	3234.72	44.28	18.32	48
G14-1590R2	Pop2	G10PR-10 x G10PR-56389R2	Set3	Year_2016	Athens	Rep3	341	12	62	2474.8	43.52	18.29	49
G14-1601R2	Pop2	G10PR-10 x G10PR-56389R2	Set3	Year_2016	Athens	Rep3	316	10	65	3335.6	44.9	18.77	52
G14-1615R2	Pop2	G10PR-10 x G10PR-56389R2	Set3	Year_2016	Athens	Rep3	302	9	60	3564.25	44.16	19.59	52
G14-1650R2	Pop2	G10PR-10 x G10PR-56389R2	Set3	Year_2016	Athens	Rep3	301	9	59	2750.53	42.45	19.89	46
G14-1663R2	Pop2	G10PR-10 x G10PR-56389R2	Set3	Year_2016	Athens	Rep3	325	11	61	2925.38	41.96	19.96	52
G14-1664R2	Pop2	G10PR-10 x G10PR-56389R2	Set3	Year_2016	Athens	Rep3	329	11	65	3194.38	44.75	18.45	49
G14-1665R2	Pop2	G10PR-10 x G10PR-56389R2	Set3	Year_2016	Athens	Rep3	305	9	63	3362.5	43.64	18.64	45
G14-1666R2	Pop2	G10PR-10 x G10PR-56389R2	Set3	Year_2016	Athens	Rep3	327	11	63	3254.9	44.65	18.35	48
G14-1668R2	Pop2	G10PR-10 x G10PR-56389R2	Set3	Year_2016	Athens	Rep3	331	11	67	3086.78	41.38	18.88	47
G14-1687R2	Pop2	G10PR-10 x G10PR-56389R2	Set3	Year_2016	Athens	Rep3	339	12	64	2777.43	40.57	20.55	52
G14-1688R2	Pop2	G10PR-10 x G10PR-56389R2	Set3	Year_2016	Athens	Rep3	323	11	59	2824.5	44.66	18.6	49
G14-1690R2	Pop2	G10PR-10 x G10PR-56389R2	Set3	Year_2016	Athens	Rep3	304	9	62	3470.1	41.21	19.04	50
G14-1694R2	Pop2	G10PR-10 x G10PR-56389R2	Set3	Year_2016	Athens	Rep3	330	11	66	2965.72	40.31	20.08	50
G14-1695R2	Pop2	G10PR-10 x G10PR-56389R2	Set3	Year_2016	Athens	Rep3	307	9	65	3564.25	40.86	20.14	53
G14-1696R2	Pop2	G10PR-10 x G10PR-56389R2	Set3	Year_2016	Athens	Rep3	315	10	66	3456.65	40.38	19.97	50
G14-1703R2	Pop2	G10PR-10 x G10PR-56389R2	Set3	Year_2016	Athens	Rep3	321	10	60	3456.65	41.56	19.99	47
G14-1709R2	Pop2	G10PR-10 x G10PR-56389R2	Set3	Year_2016	Athens	Rep3	317	10	64	3133.85	43.52	18.84	53
G14-1710R2	Pop2	G10PR-10 x G10PR-56389R2	Set3	Year_2016	Athens	Rep3	344	12	59	2494.97	41.23	20.23	44
G14-1746R2	Pop2	G10PR-10 x G10PR-56389R2	Set3	Year_2016	Athens	Rep3	326	11	62	3342.32	42.92	18.91	48
G14-1751R2	Pop2	G10PR-10 x G10PR-56389R2	Set3	Year_2016	Athens	Rep3	343	12	60	2757.25	41.27	20.03	48
G14-1768R2	Pop2	G10PR-10 x G10PR-56389R2	Set3	Year_2016	Athens	Rep3	310	9	68	3456.65	42.9	19.04	53
G14-1776R2	Pop2	G10PR-10 x G10PR-56389R2	Set3	Year_2016	Athens	Rep3	333	11	69	2723.62	43.91	19.23	43
G14-1779R2	Pop2	G10PR-10 x G10PR-56389R2	Set3	Year_2016	Athens	Rep3	319	10	62	3106.95	42.22	19.96	50
G14-1782R2	Pop2	G10PR-10 x G10PR-56389R2	Set3	Year_2016	Athens	Rep3	320	10	61	3369.22	41.75	19.36	52
G14-1790R2	Pop2	G10PR-10 x G10PR-56389R2	Set3	Year_2016	Athens	Rep3	311	9	69	3651.68	39.16	20.72	50
G14-1793R2	Pop2	G10PR-10 x G10PR-56389R2	Set3	Year_2016	Athens	Rep3	342	12	61	2723.62	42.77	19.31	52
G14-1799R2	Pop2	G10PR-10 x G10PR-56389R2	Set3	Year_2016	Athens	Rep3	312	10	69	3080.05	41.38	19.39	50
G14-1808R2	Pop2	G10PR-10 x G10PR-56389R2	Set3	Year_2016	Athens	Rep3	324	11	60	2837.95	42.7	18.42	51
G14-1811R2	Pop2	G10PR-10 x G10PR-56389R2	Set3	Year_2016	Athens	Rep3	337	12	66	2663.1	42.53	19.24	51
G14-1833R2	Pop2	G10PR-10 x G10PR-56389R2	Set3	Year_2016	Athens	Rep3	336	12	67	2750.53	42.76	19.65	52
AG6534	check	check	Set4	Year_2016	Athens	Rep1	117	14	64	2965.72	43.52	20.15	50
AG7733	check	check	Set4	Year_2016	Athens	Rep1	108	13	66	2905.2	42.29	19.16	54
G14-1532R2	Pop2	G10PR-10 x G10PR-56389R2	Set4	Year_2016	Athens	Rep1	138	16	65	2938.82	41.13	19.65	48
G14-1541R2	Pop2	G10PR-10 x G10PR-56389R2	Set4	Year_2016	Athens	Rep1	125	15	61	3053.15	43.44	18.66	47
G14-1542R2	Pop2	G10PR-10 x G10PR-56389R2	Set4	Year_2016	Athens	Rep1	131	15	67	3167.47	42.78	18.84	49
G14-1544R2	Pop2	G10PR-10 x G10PR-56389R2	Set4	Year_2016	Athens	Rep1	122	14	59	2683.28	44	18.27	53
G14-1581R2	Pop2	G10PR-10 x G10PR-56389R2	Set4	Year_2016	Athens	Rep1	107	13	65	2750.53	43.07	18	53
G14-1582R2	Pop2	G10PR-10 x G10PR-56389R2	Set4	Year_2016	Athens	Rep1	129	15	65	3335.6	38.29	19.51	48
G14-1586R2	Pop2	G10PR-10 x G10PR-56389R2	Set4	Year_2016	Athens	Rep1	115	14	66	2777.43	42.32	18.39	50
G14-1587R2	Pop2	G10PR-10 x G10PR-56389R2	Set4	Year_2016	Athens	Rep1	120	14	61	2656.38	43.27	17.86	52
G14-1592R2	Pop2	G10PR-10 x G10PR-56389R2	Set4	Year_2016	Athens	Rep1	140	16	63	2959	42.4	18.81	50
G14-1597R2	Pop2	G10PR-10 x G10PR-56389R2	Set4	Year_2016	Athens	Rep1	103	13	61	2959	41.86	18.47	52
G14-1599R2	Pop2	G10PR-10 x G10PR-56389R2	Set4	Year_2016	Athens	Rep1	110	13	68	2690	43.74	19.09	49
G14-1603R2	Pop2	G10PR-10 x G10PR-56389R2	Set4	Year_2016	Athens	Rep1	106	13	64	2737.07	40.47	19.03	53
G14-1605R2	Pop2	G10PR-10 x G10PR-56389R2	Set4	Year_2016	Athens	Rep1	127	15	63	2837.95	42.25	19.54	52
G14-1607R2	Pop2	G10PR-10 x G10PR-56389R2	Set4	Year_2016	Athens	Rep1	130	15	66	3053.15	43.77	18.91	52
G14-1608R2	Pop2	G10PR-10 x G10PR-56389R2	Set4	Year_2016	Athens	Rep1	139	16	64	2985.9	43.07	19.29	49
G14-1610R2	Pop2	G10PR-10 x G10PR-56389R2	Set4	Year_2016	Athens	Rep1	116	14	65	3113.68	41.97	18.79	52
G14-1616R2	Pop2	G10PR-10 x G10PR-56389R2	Set4	Year_2016	Athens	Rep1	135	16	68	3618.05	43.39	18.58	51
G14-1629R2	Pop2	G10PR-10 x G10PR-56389R2	Set4	Year_2016	Athens	Rep1	134	16	69	3611.32	42.89	19	48
G14-1631R2	Pop2	G10PR-10 x G10PR-56389R2	Set4	Year_2016	Athens	Rep1	102	13	60	2690	38.71	20.23	48
G14-1632R2	Pop2	G10PR-10 x G10PR-56389R2	Set4	Year_2016	Athens	Rep1	143	16	60	2703.45	40.58	19.7	48
G14-1633R2	Pop2	G10PR-10 x G10PR-56389R2	Set4	Year_2016	Athens	Rep1	118	14	63	2905.2	43.4	17.46	54
G14-1640R2	Pop2	G10PR-10 x G10PR-56389R2	Set4	Year_2016	Athens	Rep1	109	13	67	2757.25	44.28	19.15	51
G14-1652R2	Pop2	G10PR-10 x G10PR-56389R2	Set4	Year_2016	Athens	Rep1	123	15	59	3066.6	41.2	19.82	51
G14-1653R2	Pop2	G10PR-10 x G10PR-56389R2	Set4	Year_2016	Athens	Rep1	126	15	62	3133.85	43.05	19.43	45
G14-1654R2	Pop2	G10PR-10 x G10PR-56389R2	Set4	Year_2016	Athens	Rep1	141	16	62	3053.15	43.17	19.17	45
G14-1657R2	Pop2	G10PR-10 x G10PR-56389R2	Set4	Year_2016	Athens	Rep1	121	14	60	2373.93	43.77	18.44	48
G14-1659R2	Pop2	G10PR-10 x G10PR-56389R2	Set4	Year_2016	Athens	Rep1	144	16	59	2992.62	43.77	18.88	53
G14-1661R2	Pop2	G10PR-10 x G10PR-56389R2	Set4	Year_2016	Athens	Rep1	101	13	59	2528.6	44.03	18.55	54
G14-1676R2	Pop2	G10PR-10 x G10PR-56389R2	Set4	Year_2016	Athens	Rep1	124	15	60	2891.75	44.64	18.79	53
G14-1707R2	Pop2	G10PR-10 x G10PR-56389R2	Set4	Year_2016	Athens	Rep1	113	14	68	2636.2	42.78	18.37	48
G14-1716R2	Pop2	G10PR-10 x G10PR-56389R2	Set4	Year_2016	Athens	Rep1	114	14	67	2804.32	43.07	18.57	53
G14-1737R2	Pop2	G10PR-10 x G10PR-56389R2	Set4	Year_2016	Athens	Rep1	132	15	68	3106.95	39.62	21.43	48
G14-1747R2	Pop2	G10PR-10 x G10PR-56389R2	Set4	Year_2016	Athens	Rep1	133	15	69	3059.88	42.62	18.97	47
G14-1752R2	Pop2	G10PR-10 x G10PR-56389R2	Set4	Year_2016	Athens	Rep1	105	13	63	2790.88	44.65	18.7	52
G14-1753R2	Pop2	G10PR-10 x G10PR-56389R2	Set4	Year_2016	Athens	Rep1	137	16	66	3086.78	41.4	19.72	51
G14-1755R2	Pop2	G10PR-10 x G10PR-56389R2	Set4	Year_2016	Athens	Rep1	111	13	69	2656.38	42.42	19.02	49
G14-1758R2	Pop2	G10PR-10 x G10PR-56389R2	Set4	Year_2016	Athens	Rep1	112	14	69	2131.82	44.48	18.7	54
G14-1795R2	Pop2	G10PR-10 x G10PR-56389R2	Set4	Year_2016	Athens	Rep1	142	16	61	2716.9	43.77	18.86	47
G14-1796R2	Pop2	G10PR-10 x G10PR-56389R2	Set4	Year_2016	Athens	Rep1	104	13	62	2743.8	43.03	19.5	51
G14-1801R2	Pop2	G10PR-10 x G10PR-56389R2	Set4	Year_2016	Athens	Rep1	136	16	67	3268.35	41.06	19.32	53
G14-1817R2	Pop2	G10PR-10 x G10PR-56389R2	Set4	Year_2016	Athens	Rep1	128	15	64	2999.35	38.3	20.38	49
G14-1819R2	Pop2	G10PR-10 x G10PR-56389R2	Set4	Year_2016	Athens	Rep1	119	14	62	2669.82	40.96	19.34	53
AG6534	check	check	Set4	Year_2016	Athens	Rep2	243	20	60	3429.75	42.41	20.06	50
AG7733	check	check	Set4	Year_2016	Athens	Rep2	240	20	63	3154.03	41.4	18.75	53
G14-1532R2	Pop2	G10PR-10 x G10PR-56389R2	Set4	Year_2016	Athens	Rep2	222	18	59	3093.5	41.89	19.17	46
G14-1541R2	Pop2	G10PR-10 x G10PR-56389R2	Set4	Year_2016	Athens	Rep2	216	18	65	2938.82	43.43	19.02	48
G14-1542R2	Pop2	G10PR-10 x G10PR-56389R2	Set4	Year_2016	Athens	Rep2	204	17	62	3342.32	42.86	18.98	47
G14-1544R2	Pop2	G10PR-10 x G10PR-56389R2	Set4	Year_2016	Athens	Rep2	236	20	67	3140.57	41.63	19.04	53
G14-1581R2	Pop2	G10PR-10 x G10PR-56389R2	Set4	Year_2016	Athens	Rep2	244	20	59	3180.93	42.18	18.46	52
G14-1582R2	Pop2	G10PR-10 x G10PR-56389R2	Set4	Year_2016	Athens	Rep2	215	18	66	2959	38.83	20.1	50
G14-1586R2	Pop2	G10PR-10 x G10PR-56389R2	Set4	Year_2016	Athens	Rep2	221	18	60	3449.93	42.1	18.84	48
G14-1587R2	Pop2	G10PR-10 x G10PR-56389R2	Set4	Year_2016	Athens	Rep2	214	18	67	2763.97	43.35	18.45	53
G14-1592R2	Pop2	G10PR-10 x G10PR-56389R2	Set4	Year_2016	Athens	Rep2	209	17	67	2959	43.13	18.99	50
G14-1597R2	Pop2	G10PR-10 x G10PR-56389R2	Set4	Year_2016	Athens	Rep2	219	18	62	2851.4	40.58	19.28	50
G14-1599R2	Pop2	G10PR-10 x G10PR-56389R2	Set4	Year_2016	Athens	Rep2	233	19	69	3093.5	43.09	19.63	47
G14-1603R2	Pop2	G10PR-10 x G10PR-56389R2	Set4	Year_2016	Athens	Rep2	227	19	63	2925.38	39.75	19.56	50
G14-1605R2	Pop2	G10PR-10 x G10PR-56389R2	Set4	Year_2016	Athens	Rep2	231	19	67	3261.62	41.49	19.64	52
G14-1607R2	Pop2	G10PR-10 x G10PR-56389R2	Set4	Year_2016	Athens	Rep2	229	19	65	2885.03	44.2	17.92	52
G14-1608R2	Pop2	G10PR-10 x G10PR-56389R2	Set4	Year_2016	Athens	Rep2	218	18	63	2790.88	43.34	18.73	52
G14-1610R2	Pop2	G10PR-10 x G10PR-56389R2	Set4	Year_2016	Athens	Rep2	212	18	69	3106.95	40.92	19.23	52
G14-1616R2	Pop2	G10PR-10 x G10PR-56389R2	Set4	Year_2016	Athens	Rep2	201	17	59	3241.45	42.49	19.18	50
G14-1629R2	Pop2	G10PR-10 x G10PR-56389R2	Set4	Year_2016	Athens	Rep2	210	17	68	2858.12	42.8	18.83	51
G14-1631R2	Pop2	G10PR-10 x G10PR-56389R2	Set4	Year_2016	Athens	Rep2	211	17	69	2878.3	38.31	20.17	45
G14-1632R2	Pop2	G10PR-10 x G10PR-56389R2	Set4	Year_2016	Athens	Rep2	220	18	61	3093.5	40.24	19.85	47
G14-1633R2	Pop2	G10PR-10 x G10PR-56389R2	Set4	Year_2016	Athens	Rep2	241	20	62	3355.78	42.79	18.39	52
G14-1640R2	Pop2	G10PR-10 x G10PR-56389R2	Set4	Year_2016	Athens	Rep2	237	20	66	3322.15	44.38	18.74	52
G14-1652R2	Pop2	G10PR-10 x G10PR-56389R2	Set4	Year_2016	Athens	Rep2	223	19	59	3026.25	39.87	20.75	51
G14-1653R2	Pop2	G10PR-10 x G10PR-56389R2	Set4	Year_2016	Athens	Rep2	224	19	60	2979.18	42.31	19.57	45
G14-1654R2	Pop2	G10PR-10 x G10PR-56389R2	Set4	Year_2016	Athens	Rep2	232	19	68	3187.65	41.82	19.54	46
G14-1657R2	Pop2	G10PR-10 x G10PR-56389R2	Set4	Year_2016	Athens	Rep2	242	20	61	3140.57	41.63	19.43	48
G14-1659R2	Pop2	G10PR-10 x G10PR-56389R2	Set4	Year_2016	Athens	Rep2	217	18	64	2763.97	43.98	18.91	52
G14-1661R2	Pop2	G10PR-10 x G10PR-56389R2	Set4	Year_2016	Athens	Rep2	230	19	66	3039.7	42.98	18.97	53
G14-1676R2	Pop2	G10PR-10 x G10PR-56389R2	Set4	Year_2016	Athens	Rep2	226	19	62	2979.18	44.6	18.92	52
G14-1707R2	Pop2	G10PR-10 x G10PR-56389R2	Set4	Year_2016	Athens	Rep2	234	20	69	3423.03	41.15	19.21	48
G14-1716R2	Pop2	G10PR-10 x G10PR-56389R2	Set4	Year_2016	Athens	Rep2	206	17	64	2979.18	41.63	20.1	51
G14-1737R2	Pop2	G10PR-10 x G10PR-56389R2	Set4	Year_2016	Athens	Rep2	239	20	64	3342.32	40.4	20.79	47
G14-1747R2	Pop2	G10PR-10 x G10PR-56389R2	Set4	Year_2016	Athens	Rep2	238	20	65	3510.45	43.13	18.48	49
G14-1752R2	Pop2	G10PR-10 x G10PR-56389R2	Set4	Year_2016	Athens	Rep2	213	18	68	3039.7	43.08	19.48	48
G14-1753R2	Pop2	G10PR-10 x G10PR-56389R2	Set4	Year_2016	Athens	Rep2	207	17	65	2979.18	41.88	19.33	52
G14-1755R2	Pop2	G10PR-10 x G10PR-56389R2	Set4	Year_2016	Athens	Rep2	235	20	68	3523.9	40.71	19.21	50
G14-1758R2	Pop2	G10PR-10 x G10PR-56389R2	Set4	Year_2016	Athens	Rep2	228	19	64	2125.1	43	19.01	51
G14-1795R2	Pop2	G10PR-10 x G10PR-56389R2	Set4	Year_2016	Athens	Rep2	208	17	66	2589.12	44.39	19.31	45
G14-1796R2	Pop2	G10PR-10 x G10PR-56389R2	Set4	Year_2016	Athens	Rep2	203	17	61	2945.55	42.45	20	46
G14-1801R2	Pop2	G10PR-10 x G10PR-56389R2	Set4	Year_2016	Athens	Rep2	202	17	60	3349.05	41.03	19.67	51
G14-1817R2	Pop2	G10PR-10 x G10PR-56389R2	Set4	Year_2016	Athens	Rep2	225	19	61	3066.6	38.33	20.01	48
G14-1819R2	Pop2	G10PR-10 x G10PR-56389R2	Set4	Year_2016	Athens	Rep2	205	17	63	2999.35	41	19.04	51
AG6534	check	check	Set4	Year_2016	Athens	Rep3	304	21	62	2501.7	44.41	19.72	50
AG7733	check	check	Set4	Year_2016	Athens	Rep3	341	24	62	2515.15	43.34	19.01	54
G14-1532R2	Pop2	G10PR-10 x G10PR-56389R2	Set4	Year_2016	Athens	Rep3	316	22	65	3133.85	42.29	19.3	50
G14-1541R2	Pop2	G10PR-10 x G10PR-56389R2	Set4	Year_2016	Athens	Rep3	339	24	64	2716.9	44.17	18.9	47
G14-1542R2	Pop2	G10PR-10 x G10PR-56389R2	Set4	Year_2016	Athens	Rep3	337	24	66	2548.78	44.85	18.3	49
G14-1544R2	Pop2	G10PR-10 x G10PR-56389R2	Set4	Year_2016	Athens	Rep3	327	23	63	2535.32	43.57	18.75	53
G14-1581R2	Pop2	G10PR-10 x G10PR-56389R2	Set4	Year_2016	Athens	Rep3	315	22	66	3080.05	43.32	18.15	53
G14-1582R2	Pop2	G10PR-10 x G10PR-56389R2	Set4	Year_2016	Athens	Rep3	329	23	65	2985.9	38.21	19.71	49
G14-1586R2	Pop2	G10PR-10 x G10PR-56389R2	Set4	Year_2016	Athens	Rep3	318	22	63	2985.9	42.74	18.66	48
G14-1587R2	Pop2	G10PR-10 x G10PR-56389R2	Set4	Year_2016	Athens	Rep3	305	21	63	2972.45	43.21	18.25	53
G14-1592R2	Pop2	G10PR-10 x G10PR-56389R2	Set4	Year_2016	Athens	Rep3	307	21	65	3140.57	41.97	18.94	54
G14-1597R2	Pop2	G10PR-10 x G10PR-56389R2	Set4	Year_2016	Athens	Rep3	306	21	64	2804.32	41.27	18.83	52
G14-1599R2	Pop2	G10PR-10 x G10PR-56389R2	Set4	Year_2016	Athens	Rep3	325	23	61	2932.1	45.49	18.26	50
G14-1603R2	Pop2	G10PR-10 x G10PR-56389R2	Set4	Year_2016	Athens	Rep3	301	21	59	2542.05	40.18	19.48	53
G14-1605R2	Pop2	G10PR-10 x G10PR-56389R2	Set4	Year_2016	Athens	Rep3	344	24	59	2414.28	44.26	18.55	54
G14-1607R2	Pop2	G10PR-10 x G10PR-56389R2	Set4	Year_2016	Athens	Rep3	323	23	59	2501.7	44.45	18.4	51
G14-1608R2	Pop2	G10PR-10 x G10PR-56389R2	Set4	Year_2016	Athens	Rep3	308	21	66	2932.1	42.95	18.83	53
G14-1610R2	Pop2	G10PR-10 x G10PR-56389R2	Set4	Year_2016	Athens	Rep3	311	21	69	3510.45	40.41	19.5	52
G14-1616R2	Pop2	G10PR-10 x G10PR-56389R2	Set4	Year_2016	Athens	Rep3	326	23	62	3019.53	44.48	18.62	52
G14-1629R2	Pop2	G10PR-10 x G10PR-56389R2	Set4	Year_2016	Athens	Rep3	302	21	60	2394.1	43.96	18.49	54
G14-1631R2	Pop2	G10PR-10 x G10PR-56389R2	Set4	Year_2016	Athens	Rep3	331	23	67	2898.47	38.65	19.58	48
G14-1632R2	Pop2	G10PR-10 x G10PR-56389R2	Set4	Year_2016	Athens	Rep3	343	24	60	2138.55	41.07	18.95	48
G14-1633R2	Pop2	G10PR-10 x G10PR-56389R2	Set4	Year_2016	Athens	Rep3	309	21	67	3120.4	42.11	18.5	52
G14-1640R2	Pop2	G10PR-10 x G10PR-56389R2	Set4	Year_2016	Athens	Rep3	342	24	61	2663.1	45.47	18.93	53
G14-1652R2	Pop2	G10PR-10 x G10PR-56389R2	Set4	Year_2016	Athens	Rep3	336	24	67	2555.5	42.24	19.51	53
G14-1653R2	Pop2	G10PR-10 x G10PR-56389R2	Set4	Year_2016	Athens	Rep3	335	24	68	2790.88	43.67	19.21	46
G14-1654R2	Pop2	G10PR-10 x G10PR-56389R2	Set4	Year_2016	Athens	Rep3	317	22	64	3100.22	42.94	19.31	47
G14-1657R2	Pop2	G10PR-10 x G10PR-56389R2	Set4	Year_2016	Athens	Rep3	334	24	69	2710.18	43.07	19.24	47
G14-1659R2	Pop2	G10PR-10 x G10PR-56389R2	Set4	Year_2016	Athens	Rep3	321	22	60	2589.12	43.57	18.93	53
G14-1661R2	Pop2	G10PR-10 x G10PR-56389R2	Set4	Year_2016	Athens	Rep3	312	22	69	3449.93	43.35	18.74	54
G14-1676R2	Pop2	G10PR-10 x G10PR-56389R2	Set4	Year_2016	Athens	Rep3	314	22	67	2494.97	45.12	19.09	52
G14-1707R2	Pop2	G10PR-10 x G10PR-56389R2	Set4	Year_2016	Athens	Rep3	303	21	61	2669.82	43.16	18.69	50
G14-1716R2	Pop2	G10PR-10 x G10PR-56389R2	Set4	Year_2016	Athens	Rep3	319	22	62	2663.1	43.54	18.71	52
G14-1737R2	Pop2	G10PR-10 x G10PR-56389R2	Set4	Year_2016	Athens	Rep3	322	22	59	2871.57	41.79	19.93	47
G14-1747R2	Pop2	G10PR-10 x G10PR-56389R2	Set4	Year_2016	Athens	Rep3	330	23	66	3100.22	43.48	19.01	48
G14-1752R2	Pop2	G10PR-10 x G10PR-56389R2	Set4	Year_2016	Athens	Rep3	328	23	64	2279.78	43.06	19.92	50
G14-1753R2	Pop2	G10PR-10 x G10PR-56389R2	Set4	Year_2016	Athens	Rep3	324	23	60	3254.9	42.28	19.11	54
G14-1755R2	Pop2	G10PR-10 x G10PR-56389R2	Set4	Year_2016	Athens	Rep3	310	21	68	2938.82	41.62	18.45	50
G14-1758R2	Pop2	G10PR-10 x G10PR-56389R2	Set4	Year_2016	Athens	Rep3	338	24	65	1782.12	43.34	19.49	54
G14-1795R2	Pop2	G10PR-10 x G10PR-56389R2	Set4	Year_2016	Athens	Rep3	340	24	63	1963.7	45.32	18.31	48
G14-1796R2	Pop2	G10PR-10 x G10PR-56389R2	Set4	Year_2016	Athens	Rep3	332	23	68	3093.5	40.94	20.49	50
G14-1801R2	Pop2	G10PR-10 x G10PR-56389R2	Set4	Year_2016	Athens	Rep3	313	22	68	3019.53	41.67	19.26	54
G14-1817R2	Pop2	G10PR-10 x G10PR-56389R2	Set4	Year_2016	Athens	Rep3	333	23	69	3241.45	37.84	19.92	49
G14-1819R2	Pop2	G10PR-10 x G10PR-56389R2	Set4	Year_2016	Athens	Rep3	320	22	61	2589.12	41.58	18.71	53
AG6534	check	check	Set3	Year_2015	Plains	Rep1	106	17	33	2797.6	NA	NA	NA
AG7733	check	check	Set3	Year_2015	Plains	Rep1	131	19	36	3893.78	NA	NA	NA
G14-1523R2	Pop2	G10PR-10 x G10PR-56389R2	Set3	Year_2015	Plains	Rep1	119	18	31	3658.4	NA	NA	NA
G14-1535R2	Pop2	G10PR-10 x G10PR-56389R2	Set3	Year_2015	Plains	Rep1	107	17	34	4108.98	NA	NA	NA
G14-1536R2	Pop2	G10PR-10 x G10PR-56389R2	Set3	Year_2015	Plains	Rep1	113	18	37	3880.32	NA	NA	NA
G14-1545R2	Pop2	G10PR-10 x G10PR-56389R2	Set3	Year_2015	Plains	Rep1	140	20	32	3086.78	NA	NA	NA
G14-1546R2	Pop2	G10PR-10 x G10PR-56389R2	Set3	Year_2015	Plains	Rep1	111	17	38	3705.47	NA	NA	NA
G14-1551R2	Pop2	G10PR-10 x G10PR-56389R2	Set3	Year_2015	Plains	Rep1	141	20	31	3322.15	NA	NA	NA
G14-1552R2	Pop2	G10PR-10 x G10PR-56389R2	Set3	Year_2015	Plains	Rep1	142	20	30	3564.25	NA	NA	NA
G14-1555R2	Pop2	G10PR-10 x G10PR-56389R2	Set3	Year_2015	Plains	Rep1	116	18	34	3295.25	NA	NA	NA
G14-1558R2	Pop2	G10PR-10 x G10PR-56389R2	Set3	Year_2015	Plains	Rep1	139	20	33	3786.18	NA	NA	NA
G14-1561R2	Pop2	G10PR-10 x G10PR-56389R2	Set3	Year_2015	Plains	Rep1	102	17	29	3974.47	NA	NA	NA
G14-1566R2	Pop2	G10PR-10 x G10PR-56389R2	Set3	Year_2015	Plains	Rep1	143	20	29	3846.7	NA	NA	NA
G14-1580R2	Pop2	G10PR-10 x G10PR-56389R2	Set3	Year_2015	Plains	Rep1	125	19	30	3180.93	NA	NA	NA
G14-1590R2	Pop2	G10PR-10 x G10PR-56389R2	Set3	Year_2015	Plains	Rep1	134	20	38	3402.85	NA	NA	NA
G14-1601R2	Pop2	G10PR-10 x G10PR-56389R2	Set3	Year_2015	Plains	Rep1	130	19	35	3846.7	NA	NA	NA
G14-1615R2	Pop2	G10PR-10 x G10PR-56389R2	Set3	Year_2015	Plains	Rep1	126	19	31	3900.5	NA	NA	NA
G14-1650R2	Pop2	G10PR-10 x G10PR-56389R2	Set3	Year_2015	Plains	Rep1	112	18	38	3140.57	NA	NA	NA
G14-1663R2	Pop2	G10PR-10 x G10PR-56389R2	Set3	Year_2015	Plains	Rep1	105	17	32	4304	NA	NA	NA
G14-1664R2	Pop2	G10PR-10 x G10PR-56389R2	Set3	Year_2015	Plains	Rep1	109	17	36	4330.9	NA	NA	NA
G14-1665R2	Pop2	G10PR-10 x G10PR-56389R2	Set3	Year_2015	Plains	Rep1	144	20	28	4209.85	NA	NA	NA
G14-1666R2	Pop2	G10PR-10 x G10PR-56389R2	Set3	Year_2015	Plains	Rep1	110	17	37	3786.18	NA	NA	NA
G14-1668R2	Pop2	G10PR-10 x G10PR-56389R2	Set3	Year_2015	Plains	Rep1	135	20	37	3597.88	NA	NA	NA
G14-1687R2	Pop2	G10PR-10 x G10PR-56389R2	Set3	Year_2015	Plains	Rep1	115	18	35	4371.25	NA	NA	NA
G14-1688R2	Pop2	G10PR-10 x G10PR-56389R2	Set3	Year_2015	Plains	Rep1	138	20	34	3866.88	NA	NA	NA
G14-1690R2	Pop2	G10PR-10 x G10PR-56389R2	Set3	Year_2015	Plains	Rep1	114	18	36	4035	NA	NA	NA
G14-1694R2	Pop2	G10PR-10 x G10PR-56389R2	Set3	Year_2015	Plains	Rep1	121	18	29	3355.78	NA	NA	NA
G14-1695R2	Pop2	G10PR-10 x G10PR-56389R2	Set3	Year_2015	Plains	Rep1	124	19	29	2636.2	NA	NA	NA
G14-1696R2	Pop2	G10PR-10 x G10PR-56389R2	Set3	Year_2015	Plains	Rep1	127	19	32	3423.03	NA	NA	NA
G14-1703R2	Pop2	G10PR-10 x G10PR-56389R2	Set3	Year_2015	Plains	Rep1	133	19	38	3638.22	NA	NA	NA
G14-1709R2	Pop2	G10PR-10 x G10PR-56389R2	Set3	Year_2015	Plains	Rep1	117	18	33	3301.97	NA	NA	NA
G14-1710R2	Pop2	G10PR-10 x G10PR-56389R2	Set3	Year_2015	Plains	Rep1	123	19	28	4277.1	NA	NA	NA
G14-1746R2	Pop2	G10PR-10 x G10PR-56389R2	Set3	Year_2015	Plains	Rep1	118	18	32	4559.55	NA	NA	NA
G14-1751R2	Pop2	G10PR-10 x G10PR-56389R2	Set3	Year_2015	Plains	Rep1	122	18	28	3994.65	NA	NA	NA
G14-1768R2	Pop2	G10PR-10 x G10PR-56389R2	Set3	Year_2015	Plains	Rep1	103	17	30	3819.8	NA	NA	NA
G14-1776R2	Pop2	G10PR-10 x G10PR-56389R2	Set3	Year_2015	Plains	Rep1	137	20	35	3160.75	NA	NA	NA
G14-1779R2	Pop2	G10PR-10 x G10PR-56389R2	Set3	Year_2015	Plains	Rep1	136	20	36	3900.5	NA	NA	NA
G14-1782R2	Pop2	G10PR-10 x G10PR-56389R2	Set3	Year_2015	Plains	Rep1	108	17	35	3268.35	NA	NA	NA
G14-1790R2	Pop2	G10PR-10 x G10PR-56389R2	Set3	Year_2015	Plains	Rep1	129	19	34	3396.12	NA	NA	NA
G14-1793R2	Pop2	G10PR-10 x G10PR-56389R2	Set3	Year_2015	Plains	Rep1	128	19	33	2878.3	NA	NA	NA
G14-1799R2	Pop2	G10PR-10 x G10PR-56389R2	Set3	Year_2015	Plains	Rep1	120	18	30	3295.25	NA	NA	NA
G14-1808R2	Pop2	G10PR-10 x G10PR-56389R2	Set3	Year_2015	Plains	Rep1	132	19	37	4061.9	NA	NA	NA
G14-1811R2	Pop2	G10PR-10 x G10PR-56389R2	Set3	Year_2015	Plains	Rep1	104	17	31	3947.57	NA	NA	NA
G14-1833R2	Pop2	G10PR-10 x G10PR-56389R2	Set3	Year_2015	Plains	Rep1	101	17	28	3275.07	NA	NA	NA
AG6534	check	check	Set3	Year_2015	Plains	Rep2	225	23	30	2844.68	NA	NA	NA
AG7733	check	check	Set3	Year_2015	Plains	Rep2	210	21	37	3577.7	NA	NA	NA
G14-1523R2	Pop2	G10PR-10 x G10PR-56389R2	Set3	Year_2015	Plains	Rep2	233	23	38	3631.5	NA	NA	NA
G14-1535R2	Pop2	G10PR-10 x G10PR-56389R2	Set3	Year_2015	Plains	Rep2	235	24	37	3335.6	NA	NA	NA
G14-1536R2	Pop2	G10PR-10 x G10PR-56389R2	Set3	Year_2015	Plains	Rep2	240	24	32	3665.12	NA	NA	NA
G14-1545R2	Pop2	G10PR-10 x G10PR-56389R2	Set3	Year_2015	Plains	Rep2	219	22	31	3207.82	NA	NA	NA
G14-1546R2	Pop2	G10PR-10 x G10PR-56389R2	Set3	Year_2015	Plains	Rep2	205	21	32	3261.62	NA	NA	NA
G14-1551R2	Pop2	G10PR-10 x G10PR-56389R2	Set3	Year_2015	Plains	Rep2	236	24	36	4001.38	NA	NA	NA
G14-1552R2	Pop2	G10PR-10 x G10PR-56389R2	Set3	Year_2015	Plains	Rep2	212	22	38	3510.45	NA	NA	NA
G14-1555R2	Pop2	G10PR-10 x G10PR-56389R2	Set3	Year_2015	Plains	Rep2	222	22	28	3362.5	NA	NA	NA
G14-1558R2	Pop2	G10PR-10 x G10PR-56389R2	Set3	Year_2015	Plains	Rep2	230	23	35	4324.18	NA	NA	NA
G14-1561R2	Pop2	G10PR-10 x G10PR-56389R2	Set3	Year_2015	Plains	Rep2	214	22	36	4250.2	NA	NA	NA
G14-1566R2	Pop2	G10PR-10 x G10PR-56389R2	Set3	Year_2015	Plains	Rep2	238	24	34	3947.57	NA	NA	NA
G14-1580R2	Pop2	G10PR-10 x G10PR-56389R2	Set3	Year_2015	Plains	Rep2	226	23	31	3813.07	NA	NA	NA
G14-1590R2	Pop2	G10PR-10 x G10PR-56389R2	Set3	Year_2015	Plains	Rep2	201	21	28	3375.95	NA	NA	NA
G14-1601R2	Pop2	G10PR-10 x G10PR-56389R2	Set3	Year_2015	Plains	Rep2	243	24	29	3692.03	NA	NA	NA
G14-1615R2	Pop2	G10PR-10 x G10PR-56389R2	Set3	Year_2015	Plains	Rep2	220	22	30	3375.95	NA	NA	NA
G14-1650R2	Pop2	G10PR-10 x G10PR-56389R2	Set3	Year_2015	Plains	Rep2	206	21	33	3228	NA	NA	NA
G14-1663R2	Pop2	G10PR-10 x G10PR-56389R2	Set3	Year_2015	Plains	Rep2	203	21	30	3503.72	NA	NA	NA
G14-1664R2	Pop2	G10PR-10 x G10PR-56389R2	Set3	Year_2015	Plains	Rep2	223	23	28	4909.25	NA	NA	NA
G14-1665R2	Pop2	G10PR-10 x G10PR-56389R2	Set3	Year_2015	Plains	Rep2	232	23	37	3792.9	NA	NA	NA
G14-1666R2	Pop2	G10PR-10 x G10PR-56389R2	Set3	Year_2015	Plains	Rep2	228	23	33	3893.78	NA	NA	NA
G14-1668R2	Pop2	G10PR-10 x G10PR-56389R2	Set3	Year_2015	Plains	Rep2	227	23	32	3443.2	NA	NA	NA
G14-1687R2	Pop2	G10PR-10 x G10PR-56389R2	Set3	Year_2015	Plains	Rep2	234	24	38	4425.05	NA	NA	NA
G14-1688R2	Pop2	G10PR-10 x G10PR-56389R2	Set3	Year_2015	Plains	Rep2	218	22	32	3974.47	NA	NA	NA
G14-1690R2	Pop2	G10PR-10 x G10PR-56389R2	Set3	Year_2015	Plains	Rep2	224	23	29	4196.4	NA	NA	NA
G14-1694R2	Pop2	G10PR-10 x G10PR-56389R2	Set3	Year_2015	Plains	Rep2	241	24	31	4028.28	NA	NA	NA
G14-1695R2	Pop2	G10PR-10 x G10PR-56389R2	Set3	Year_2015	Plains	Rep2	217	22	33	3026.25	NA	NA	NA
G14-1696R2	Pop2	G10PR-10 x G10PR-56389R2	Set3	Year_2015	Plains	Rep2	215	22	35	4021.55	NA	NA	NA
G14-1703R2	Pop2	G10PR-10 x G10PR-56389R2	Set3	Year_2015	Plains	Rep2	237	24	35	4149.32	NA	NA	NA
G14-1709R2	Pop2	G10PR-10 x G10PR-56389R2	Set3	Year_2015	Plains	Rep2	221	22	29	3523.9	NA	NA	NA
G14-1710R2	Pop2	G10PR-10 x G10PR-56389R2	Set3	Year_2015	Plains	Rep2	207	21	34	3954.3	NA	NA	NA
G14-1746R2	Pop2	G10PR-10 x G10PR-56389R2	Set3	Year_2015	Plains	Rep2	244	24	28	4075.35	NA	NA	NA
G14-1751R2	Pop2	G10PR-10 x G10PR-56389R2	Set3	Year_2015	Plains	Rep2	204	21	31	3940.85	NA	NA	NA
G14-1768R2	Pop2	G10PR-10 x G10PR-56389R2	Set3	Year_2015	Plains	Rep2	208	21	35	3913.95	NA	NA	NA
G14-1776R2	Pop2	G10PR-10 x G10PR-56389R2	Set3	Year_2015	Plains	Rep2	229	23	34	3147.3	NA	NA	NA
G14-1779R2	Pop2	G10PR-10 x G10PR-56389R2	Set3	Year_2015	Plains	Rep2	216	22	34	3779.45	NA	NA	NA
G14-1782R2	Pop2	G10PR-10 x G10PR-56389R2	Set3	Year_2015	Plains	Rep2	211	21	38	3698.75	NA	NA	NA
G14-1790R2	Pop2	G10PR-10 x G10PR-56389R2	Set3	Year_2015	Plains	Rep2	239	24	33	3934.12	NA	NA	NA
G14-1793R2	Pop2	G10PR-10 x G10PR-56389R2	Set3	Year_2015	Plains	Rep2	231	23	36	3806.35	NA	NA	NA
G14-1799R2	Pop2	G10PR-10 x G10PR-56389R2	Set3	Year_2015	Plains	Rep2	213	22	37	3893.78	NA	NA	NA
G14-1808R2	Pop2	G10PR-10 x G10PR-56389R2	Set3	Year_2015	Plains	Rep2	242	24	30	3510.45	NA	NA	NA
G14-1811R2	Pop2	G10PR-10 x G10PR-56389R2	Set3	Year_2015	Plains	Rep2	209	21	36	4283.82	NA	NA	NA
G14-1833R2	Pop2	G10PR-10 x G10PR-56389R2	Set3	Year_2015	Plains	Rep2	202	21	29	3402.85	NA	NA	NA
AG6534	check	check	Set4	Year_2015	Plains	Rep1	143	3	13	2979.18	NA	NA	NA
AG7733	check	check	Set4	Year_2015	Plains	Rep1	113	1	13	3887.05	NA	NA	NA
G14-1532R2	Pop2	G10PR-10 x G10PR-56389R2	Set4	Year_2015	Plains	Rep1	103	1	3	3887.05	NA	NA	NA
G14-1541R2	Pop2	G10PR-10 x G10PR-56389R2	Set4	Year_2015	Plains	Rep1	118	2	13	3665.12	NA	NA	NA
G14-1542R2	Pop2	G10PR-10 x G10PR-56389R2	Set4	Year_2015	Plains	Rep1	127	2	4	3967.75	NA	NA	NA
G14-1544R2	Pop2	G10PR-10 x G10PR-56389R2	Set4	Year_2015	Plains	Rep1	128	2	3	4122.43	NA	NA	NA
G14-1581R2	Pop2	G10PR-10 x G10PR-56389R2	Set4	Year_2015	Plains	Rep1	114	1	14	4949.6	NA	NA	NA
G14-1582R2	Pop2	G10PR-10 x G10PR-56389R2	Set4	Year_2015	Plains	Rep1	140	3	10	4256.93	NA	NA	NA
G14-1586R2	Pop2	G10PR-10 x G10PR-56389R2	Set4	Year_2015	Plains	Rep1	101	1	1	3705.47	NA	NA	NA
G14-1587R2	Pop2	G10PR-10 x G10PR-56389R2	Set4	Year_2015	Plains	Rep1	107	1	7	4969.77	NA	NA	NA
G14-1592R2	Pop2	G10PR-10 x G10PR-56389R2	Set4	Year_2015	Plains	Rep1	132	3	2	3853.43	NA	NA	NA
G14-1597R2	Pop2	G10PR-10 x G10PR-56389R2	Set4	Year_2015	Plains	Rep1	126	2	5	3961.03	NA	NA	NA
G14-1599R2	Pop2	G10PR-10 x G10PR-56389R2	Set4	Year_2015	Plains	Rep1	134	3	4	3893.78	NA	NA	NA
G14-1603R2	Pop2	G10PR-10 x G10PR-56389R2	Set4	Year_2015	Plains	Rep1	141	3	11	5413.62	NA	NA	NA
G14-1605R2	Pop2	G10PR-10 x G10PR-56389R2	Set4	Year_2015	Plains	Rep1	116	2	15	4963.05	NA	NA	NA
G14-1607R2	Pop2	G10PR-10 x G10PR-56389R2	Set4	Year_2015	Plains	Rep1	117	2	14	4472.12	NA	NA	NA
G14-1608R2	Pop2	G10PR-10 x G10PR-56389R2	Set4	Year_2015	Plains	Rep1	138	3	8	3766	NA	NA	NA
G14-1610R2	Pop2	G10PR-10 x G10PR-56389R2	Set4	Year_2015	Plains	Rep1	122	2	9	3846.7	NA	NA	NA
G14-1616R2	Pop2	G10PR-10 x G10PR-56389R2	Set4	Year_2015	Plains	Rep1	120	2	11	4626.8	NA	NA	NA
G14-1629R2	Pop2	G10PR-10 x G10PR-56389R2	Set4	Year_2015	Plains	Rep1	119	2	12	3449.93	NA	NA	NA
G14-1631R2	Pop2	G10PR-10 x G10PR-56389R2	Set4	Year_2015	Plains	Rep1	129	2	2	4014.82	NA	NA	NA
G14-1632R2	Pop2	G10PR-10 x G10PR-56389R2	Set4	Year_2015	Plains	Rep1	139	3	9	4142.6	NA	NA	NA
G14-1633R2	Pop2	G10PR-10 x G10PR-56389R2	Set4	Year_2015	Plains	Rep1	131	3	1	4223.3	NA	NA	NA
G14-1640R2	Pop2	G10PR-10 x G10PR-56389R2	Set4	Year_2015	Plains	Rep1	106	1	6	4519.2	NA	NA	NA
G14-1652R2	Pop2	G10PR-10 x G10PR-56389R2	Set4	Year_2015	Plains	Rep1	125	2	6	4256.93	NA	NA	NA
G14-1653R2	Pop2	G10PR-10 x G10PR-56389R2	Set4	Year_2015	Plains	Rep1	133	3	3	3880.32	NA	NA	NA
G14-1654R2	Pop2	G10PR-10 x G10PR-56389R2	Set4	Year_2015	Plains	Rep1	124	2	7	3806.35	NA	NA	NA
G14-1657R2	Pop2	G10PR-10 x G10PR-56389R2	Set4	Year_2015	Plains	Rep1	135	3	5	3745.82	NA	NA	NA
G14-1659R2	Pop2	G10PR-10 x G10PR-56389R2	Set4	Year_2015	Plains	Rep1	105	1	5	3523.9	NA	NA	NA
G14-1661R2	Pop2	G10PR-10 x G10PR-56389R2	Set4	Year_2015	Plains	Rep1	102	1	2	3207.82	NA	NA	NA
G14-1676R2	Pop2	G10PR-10 x G10PR-56389R2	Set4	Year_2015	Plains	Rep1	142	3	12	3180.93	NA	NA	NA
G14-1707R2	Pop2	G10PR-10 x G10PR-56389R2	Set4	Year_2015	Plains	Rep1	110	1	10	4384.7	NA	NA	NA
G14-1716R2	Pop2	G10PR-10 x G10PR-56389R2	Set4	Year_2015	Plains	Rep1	112	1	12	3591.15	NA	NA	NA
G14-1737R2	Pop2	G10PR-10 x G10PR-56389R2	Set4	Year_2015	Plains	Rep1	123	2	8	3860.15	NA	NA	NA
G14-1747R2	Pop2	G10PR-10 x G10PR-56389R2	Set4	Year_2015	Plains	Rep1	144	3	14	4579.73	NA	NA	NA
G14-1752R2	Pop2	G10PR-10 x G10PR-56389R2	Set4	Year_2015	Plains	Rep1	104	1	4	3786.18	NA	NA	NA
G14-1753R2	Pop2	G10PR-10 x G10PR-56389R2	Set4	Year_2015	Plains	Rep1	137	3	7	3880.32	NA	NA	NA
G14-1755R2	Pop2	G10PR-10 x G10PR-56389R2	Set4	Year_2015	Plains	Rep1	136	3	6	4102.25	NA	NA	NA
G14-1758R2	Pop2	G10PR-10 x G10PR-56389R2	Set4	Year_2015	Plains	Rep1	111	1	11	4277.1	NA	NA	NA
G14-1795R2	Pop2	G10PR-10 x G10PR-56389R2	Set4	Year_2015	Plains	Rep1	108	1	8	3490.28	NA	NA	NA
G14-1796R2	Pop2	G10PR-10 x G10PR-56389R2	Set4	Year_2015	Plains	Rep1	121	2	10	4842	NA	NA	NA
G14-1801R2	Pop2	G10PR-10 x G10PR-56389R2	Set4	Year_2015	Plains	Rep1	109	1	9	3826.53	NA	NA	NA
G14-1817R2	Pop2	G10PR-10 x G10PR-56389R2	Set4	Year_2015	Plains	Rep1	115	1	15	4068.62	NA	NA	NA
G14-1819R2	Pop2	G10PR-10 x G10PR-56389R2	Set4	Year_2015	Plains	Rep1	130	2	1	3887.05	NA	NA	NA
AG6534	check	check	Set4	Year_2015	Plains	Rep2	224	5	9	3328.88	NA	NA	NA
AG7733	check	check	Set4	Year_2015	Plains	Rep2	202	4	14	4203.12	NA	NA	NA
G14-1532R2	Pop2	G10PR-10 x G10PR-56389R2	Set4	Year_2015	Plains	Rep2	235	6	11	4754.57	NA	NA	NA
G14-1541R2	Pop2	G10PR-10 x G10PR-56389R2	Set4	Year_2015	Plains	Rep2	217	5	2	4256.93	NA	NA	NA
G14-1542R2	Pop2	G10PR-10 x G10PR-56389R2	Set4	Year_2015	Plains	Rep2	220	5	5	3584.43	NA	NA	NA
G14-1544R2	Pop2	G10PR-10 x G10PR-56389R2	Set4	Year_2015	Plains	Rep2	236	6	10	4519.2	NA	NA	NA
G14-1581R2	Pop2	G10PR-10 x G10PR-56389R2	Set4	Year_2015	Plains	Rep2	211	4	5	4102.25	NA	NA	NA
G14-1582R2	Pop2	G10PR-10 x G10PR-56389R2	Set4	Year_2015	Plains	Rep2	205	4	11	4189.68	NA	NA	NA
G14-1586R2	Pop2	G10PR-10 x G10PR-56389R2	Set4	Year_2015	Plains	Rep2	218	5	3	4505.75	NA	NA	NA
G14-1587R2	Pop2	G10PR-10 x G10PR-56389R2	Set4	Year_2015	Plains	Rep2	214	4	2	4243.48	NA	NA	NA
G14-1592R2	Pop2	G10PR-10 x G10PR-56389R2	Set4	Year_2015	Plains	Rep2	208	4	8	3692.03	NA	NA	NA
G14-1597R2	Pop2	G10PR-10 x G10PR-56389R2	Set4	Year_2015	Plains	Rep2	240	6	6	4317.45	NA	NA	NA
G14-1599R2	Pop2	G10PR-10 x G10PR-56389R2	Set4	Year_2015	Plains	Rep2	222	5	7	3846.7	NA	NA	NA
G14-1603R2	Pop2	G10PR-10 x G10PR-56389R2	Set4	Year_2015	Plains	Rep2	239	6	7	4942.88	NA	NA	NA
G14-1605R2	Pop2	G10PR-10 x G10PR-56389R2	Set4	Year_2015	Plains	Rep2	244	6	2	5084.1	NA	NA	NA
G14-1607R2	Pop2	G10PR-10 x G10PR-56389R2	Set4	Year_2015	Plains	Rep2	234	6	12	4458.68	NA	NA	NA
G14-1608R2	Pop2	G10PR-10 x G10PR-56389R2	Set4	Year_2015	Plains	Rep2	207	4	9	3846.7	NA	NA	NA
G14-1610R2	Pop2	G10PR-10 x G10PR-56389R2	Set4	Year_2015	Plains	Rep2	204	4	12	3887.05	NA	NA	NA
G14-1616R2	Pop2	G10PR-10 x G10PR-56389R2	Set4	Year_2015	Plains	Rep2	215	4	1	4942.88	NA	NA	NA
G14-1629R2	Pop2	G10PR-10 x G10PR-56389R2	Set4	Year_2015	Plains	Rep2	230	5	15	3295.25	NA	NA	NA
G14-1631R2	Pop2	G10PR-10 x G10PR-56389R2	Set4	Year_2015	Plains	Rep2	226	5	11	5057.2	NA	NA	NA
G14-1632R2	Pop2	G10PR-10 x G10PR-56389R2	Set4	Year_2015	Plains	Rep2	225	5	10	5380	NA	NA	NA
G14-1633R2	Pop2	G10PR-10 x G10PR-56389R2	Set4	Year_2015	Plains	Rep2	243	6	3	4754.57	NA	NA	NA
G14-1640R2	Pop2	G10PR-10 x G10PR-56389R2	Set4	Year_2015	Plains	Rep2	221	5	6	4472.12	NA	NA	NA
G14-1652R2	Pop2	G10PR-10 x G10PR-56389R2	Set4	Year_2015	Plains	Rep2	241	6	5	4028.28	NA	NA	NA
G14-1653R2	Pop2	G10PR-10 x G10PR-56389R2	Set4	Year_2015	Plains	Rep2	237	6	9	4082.07	NA	NA	NA
G14-1654R2	Pop2	G10PR-10 x G10PR-56389R2	Set4	Year_2015	Plains	Rep2	210	4	6	3624.78	NA	NA	NA
G14-1657R2	Pop2	G10PR-10 x G10PR-56389R2	Set4	Year_2015	Plains	Rep2	233	6	13	3826.53	NA	NA	NA
G14-1659R2	Pop2	G10PR-10 x G10PR-56389R2	Set4	Year_2015	Plains	Rep2	228	5	13	3342.32	NA	NA	NA
G14-1661R2	Pop2	G10PR-10 x G10PR-56389R2	Set4	Year_2015	Plains	Rep2	238	6	8	3611.32	NA	NA	NA
G14-1676R2	Pop2	G10PR-10 x G10PR-56389R2	Set4	Year_2015	Plains	Rep2	242	6	4	3254.9	NA	NA	NA
G14-1707R2	Pop2	G10PR-10 x G10PR-56389R2	Set4	Year_2015	Plains	Rep2	206	4	10	4176.23	NA	NA	NA
G14-1716R2	Pop2	G10PR-10 x G10PR-56389R2	Set4	Year_2015	Plains	Rep2	219	5	4	3638.22	NA	NA	NA
G14-1737R2	Pop2	G10PR-10 x G10PR-56389R2	Set4	Year_2015	Plains	Rep2	232	6	14	4344.35	NA	NA	NA
G14-1747R2	Pop2	G10PR-10 x G10PR-56389R2	Set4	Year_2015	Plains	Rep2	227	5	12	3591.15	NA	NA	NA
G14-1752R2	Pop2	G10PR-10 x G10PR-56389R2	Set4	Year_2015	Plains	Rep2	201	4	15	3813.07	NA	NA	NA
G14-1753R2	Pop2	G10PR-10 x G10PR-56389R2	Set4	Year_2015	Plains	Rep2	223	5	8	4425.05	NA	NA	NA
G14-1755R2	Pop2	G10PR-10 x G10PR-56389R2	Set4	Year_2015	Plains	Rep2	229	5	14	4573	NA	NA	NA
G14-1758R2	Pop2	G10PR-10 x G10PR-56389R2	Set4	Year_2015	Plains	Rep2	213	4	3	4108.98	NA	NA	NA
G14-1795R2	Pop2	G10PR-10 x G10PR-56389R2	Set4	Year_2015	Plains	Rep2	216	5	1	2837.95	NA	NA	NA
G14-1796R2	Pop2	G10PR-10 x G10PR-56389R2	Set4	Year_2015	Plains	Rep2	203	4	13	5151.35	NA	NA	NA
G14-1801R2	Pop2	G10PR-10 x G10PR-56389R2	Set4	Year_2015	Plains	Rep2	231	6	15	4330.9	NA	NA	NA
G14-1817R2	Pop2	G10PR-10 x G10PR-56389R2	Set4	Year_2015	Plains	Rep2	212	4	4	3443.2	NA	NA	NA
G14-1819R2	Pop2	G10PR-10 x G10PR-56389R2	Set4	Year_2015	Plains	Rep2	209	4	7	4573	NA	NA	NA
AG6534	check	check	Set3	Year_2016	Plains	Rep1	143	4	40	2844.68	40.78	20.63	NA
AG7733	check	check	Set3	Year_2016	Plains	Rep1	125	3	41	3470.1	41.58	18.94	NA
G14-1523R2	Pop2	G10PR-10 x G10PR-56389R2	Set3	Year_2016	Plains	Rep1	115	2	46	2515.15	41.24	18.91	NA
G14-1535R2	Pop2	G10PR-10 x G10PR-56389R2	Set3	Year_2016	Plains	Rep1	124	3	40	2723.62	40.29	19.71	NA
G14-1536R2	Pop2	G10PR-10 x G10PR-56389R2	Set3	Year_2016	Plains	Rep1	117	2	44	3530.62	40.08	19.53	NA
G14-1545R2	Pop2	G10PR-10 x G10PR-56389R2	Set3	Year_2016	Plains	Rep1	109	1	47	2360.47	39.12	19.17	NA
G14-1546R2	Pop2	G10PR-10 x G10PR-56389R2	Set3	Year_2016	Plains	Rep1	118	2	43	3032.97	41.75	19.49	NA
G14-1551R2	Pop2	G10PR-10 x G10PR-56389R2	Set3	Year_2016	Plains	Rep1	136	4	47	3739.1	38.26	20.23	NA
G14-1552R2	Pop2	G10PR-10 x G10PR-56389R2	Set3	Year_2016	Plains	Rep1	102	1	40	3127.12	39.67	19.36	NA
G14-1555R2	Pop2	G10PR-10 x G10PR-56389R2	Set3	Year_2016	Plains	Rep1	130	3	46	3093.5	40.35	19.33	NA
G14-1558R2	Pop2	G10PR-10 x G10PR-56389R2	Set3	Year_2016	Plains	Rep1	140	4	43	2232.7	38.66	19.32	NA
G14-1561R2	Pop2	G10PR-10 x G10PR-56389R2	Set3	Year_2016	Plains	Rep1	144	4	39	3369.22	39.91	20.05	NA
G14-1566R2	Pop2	G10PR-10 x G10PR-56389R2	Set3	Year_2016	Plains	Rep1	126	3	42	3624.78	39.37	19.06	NA
G14-1580R2	Pop2	G10PR-10 x G10PR-56389R2	Set3	Year_2016	Plains	Rep1	111	1	49	2716.9	40	19.3	NA
G14-1590R2	Pop2	G10PR-10 x G10PR-56389R2	Set3	Year_2016	Plains	Rep1	134	4	49	3497	42.55	18.4	NA
G14-1601R2	Pop2	G10PR-10 x G10PR-56389R2	Set3	Year_2016	Plains	Rep1	110	1	48	3389.4	42.62	18.39	NA
G14-1615R2	Pop2	G10PR-10 x G10PR-56389R2	Set3	Year_2016	Plains	Rep1	138	4	45	3416.3	43.67	18.99	NA
G14-1650R2	Pop2	G10PR-10 x G10PR-56389R2	Set3	Year_2016	Plains	Rep1	137	4	46	3080.05	40.4	20.19	NA
G14-1663R2	Pop2	G10PR-10 x G10PR-56389R2	Set3	Year_2016	Plains	Rep1	116	2	45	3201.1	40	20.09	NA
G14-1664R2	Pop2	G10PR-10 x G10PR-56389R2	Set3	Year_2016	Plains	Rep1	104	1	42	2945.55	39.42	19.28	NA
G14-1665R2	Pop2	G10PR-10 x G10PR-56389R2	Set3	Year_2016	Plains	Rep1	114	2	47	3032.97	41.94	18.67	NA
G14-1666R2	Pop2	G10PR-10 x G10PR-56389R2	Set3	Year_2016	Plains	Rep1	108	1	46	4230.02	42.11	18.26	NA
G14-1668R2	Pop2	G10PR-10 x G10PR-56389R2	Set3	Year_2016	Plains	Rep1	141	4	42	3544.07	38.41	19.97	NA
G14-1687R2	Pop2	G10PR-10 x G10PR-56389R2	Set3	Year_2016	Plains	Rep1	119	2	42	2616.03	39.09	19.91	NA
G14-1688R2	Pop2	G10PR-10 x G10PR-56389R2	Set3	Year_2016	Plains	Rep1	120	2	41	3375.95	40.31	19.14	NA
G14-1690R2	Pop2	G10PR-10 x G10PR-56389R2	Set3	Year_2016	Plains	Rep1	139	4	44	3449.93	39.55	19.43	NA
G14-1694R2	Pop2	G10PR-10 x G10PR-56389R2	Set3	Year_2016	Plains	Rep1	106	1	44	2878.3	39	19.73	NA
G14-1695R2	Pop2	G10PR-10 x G10PR-56389R2	Set3	Year_2016	Plains	Rep1	103	1	41	3167.47	40.07	19.19	NA
G14-1696R2	Pop2	G10PR-10 x G10PR-56389R2	Set3	Year_2016	Plains	Rep1	131	3	47	3429.75	38.92	19.76	NA
G14-1703R2	Pop2	G10PR-10 x G10PR-56389R2	Set3	Year_2016	Plains	Rep1	107	1	45	2138.55	39.06	20.35	NA
G14-1709R2	Pop2	G10PR-10 x G10PR-56389R2	Set3	Year_2016	Plains	Rep1	128	3	44	3470.1	41.01	19.66	NA
G14-1710R2	Pop2	G10PR-10 x G10PR-56389R2	Set3	Year_2016	Plains	Rep1	142	4	41	3624.78	39.73	21.02	NA
G14-1746R2	Pop2	G10PR-10 x G10PR-56389R2	Set3	Year_2016	Plains	Rep1	132	3	48	2837.95	39.18	19.94	NA
G14-1751R2	Pop2	G10PR-10 x G10PR-56389R2	Set3	Year_2016	Plains	Rep1	122	2	39	3416.3	40.6	19.44	NA
G14-1768R2	Pop2	G10PR-10 x G10PR-56389R2	Set3	Year_2016	Plains	Rep1	113	2	48	3113.68	42.74	18.5	NA
G14-1776R2	Pop2	G10PR-10 x G10PR-56389R2	Set3	Year_2016	Plains	Rep1	123	3	39	3799.62	39.82	20.25	NA
G14-1779R2	Pop2	G10PR-10 x G10PR-56389R2	Set3	Year_2016	Plains	Rep1	135	4	48	3127.12	41.79	19.43	NA
G14-1782R2	Pop2	G10PR-10 x G10PR-56389R2	Set3	Year_2016	Plains	Rep1	127	3	43	2979.18	41.77	18.26	NA
G14-1790R2	Pop2	G10PR-10 x G10PR-56389R2	Set3	Year_2016	Plains	Rep1	129	3	45	3745.82	39.57	19.41	NA
G14-1793R2	Pop2	G10PR-10 x G10PR-56389R2	Set3	Year_2016	Plains	Rep1	121	2	40	2992.62	41.4	18.61	NA
G14-1799R2	Pop2	G10PR-10 x G10PR-56389R2	Set3	Year_2016	Plains	Rep1	112	2	49	3759.28	39.52	19.17	NA
G14-1808R2	Pop2	G10PR-10 x G10PR-56389R2	Set3	Year_2016	Plains	Rep1	105	1	43	2938.82	40.38	17.96	NA
G14-1811R2	Pop2	G10PR-10 x G10PR-56389R2	Set3	Year_2016	Plains	Rep1	101	1	39	2945.55	42.19	19.66	NA
G14-1833R2	Pop2	G10PR-10 x G10PR-56389R2	Set3	Year_2016	Plains	Rep1	133	3	49	3315.43	43.12	19.11	NA
AG6534	check	check	Set3	Year_2016	Plains	Rep2	217	6	44	3409.57	41.61	20.33	NA
AG7733	check	check	Set3	Year_2016	Plains	Rep2	203	5	41	3644.95	40.55	19.61	NA
G14-1523R2	Pop2	G10PR-10 x G10PR-56389R2	Set3	Year_2016	Plains	Rep2	212	6	49	3248.18	41.43	19.41	NA
G14-1535R2	Pop2	G10PR-10 x G10PR-56389R2	Set3	Year_2016	Plains	Rep2	211	5	49	3483.55	41.39	19.59	NA
G14-1536R2	Pop2	G10PR-10 x G10PR-56389R2	Set3	Year_2016	Plains	Rep2	220	6	41	3476.82	40.39	19.24	NA
G14-1545R2	Pop2	G10PR-10 x G10PR-56389R2	Set3	Year_2016	Plains	Rep2	219	6	42	2938.82	38.99	19.3	NA
G14-1546R2	Pop2	G10PR-10 x G10PR-56389R2	Set3	Year_2016	Plains	Rep2	206	5	44	3429.75	41.87	19.69	NA
G14-1551R2	Pop2	G10PR-10 x G10PR-56389R2	Set3	Year_2016	Plains	Rep2	227	7	43	3766	38.79	19.98	NA
G14-1552R2	Pop2	G10PR-10 x G10PR-56389R2	Set3	Year_2016	Plains	Rep2	208	5	46	3375.95	40.64	20.16	NA
G14-1555R2	Pop2	G10PR-10 x G10PR-56389R2	Set3	Year_2016	Plains	Rep2	229	7	45	4115.7	40.43	19.71	NA
G14-1558R2	Pop2	G10PR-10 x G10PR-56389R2	Set3	Year_2016	Plains	Rep2	230	7	46	2858.12	38.1	19.9	NA
G14-1561R2	Pop2	G10PR-10 x G10PR-56389R2	Set3	Year_2016	Plains	Rep2	210	5	48	3449.93	40.47	19.46	NA
G14-1566R2	Pop2	G10PR-10 x G10PR-56389R2	Set3	Year_2016	Plains	Rep2	225	7	41	4283.82	39.4	19.18	NA
G14-1580R2	Pop2	G10PR-10 x G10PR-56389R2	Set3	Year_2016	Plains	Rep2	213	6	48	3154.03	40.05	19.66	NA
G14-1590R2	Pop2	G10PR-10 x G10PR-56389R2	Set3	Year_2016	Plains	Rep2	241	8	42	4243.48	41.6	18.79	NA
G14-1601R2	Pop2	G10PR-10 x G10PR-56389R2	Set3	Year_2016	Plains	Rep2	216	6	45	3705.47	43.04	18.69	NA
G14-1615R2	Pop2	G10PR-10 x G10PR-56389R2	Set3	Year_2016	Plains	Rep2	240	8	43	3369.22	42.35	19.42	NA
G14-1650R2	Pop2	G10PR-10 x G10PR-56389R2	Set3	Year_2016	Plains	Rep2	204	5	42	3174.2	40.05	20.43	NA
G14-1663R2	Pop2	G10PR-10 x G10PR-56389R2	Set3	Year_2016	Plains	Rep2	224	7	40	3409.57	39.79	19.8	NA
G14-1664R2	Pop2	G10PR-10 x G10PR-56389R2	Set3	Year_2016	Plains	Rep2	218	6	43	3550.8	42.62	18.57	NA
G14-1665R2	Pop2	G10PR-10 x G10PR-56389R2	Set3	Year_2016	Plains	Rep2	205	5	43	3544.07	42.7	18.94	NA
G14-1666R2	Pop2	G10PR-10 x G10PR-56389R2	Set3	Year_2016	Plains	Rep2	222	6	39	3174.2	41.65	18.73	NA
G14-1668R2	Pop2	G10PR-10 x G10PR-56389R2	Set3	Year_2016	Plains	Rep2	228	7	44	3423.03	38.64	19.6	NA
G14-1687R2	Pop2	G10PR-10 x G10PR-56389R2	Set3	Year_2016	Plains	Rep2	238	8	45	3228	38.52	20.48	NA
G14-1688R2	Pop2	G10PR-10 x G10PR-56389R2	Set3	Year_2016	Plains	Rep2	233	7	49	3665.12	40.1	19.67	NA
G14-1690R2	Pop2	G10PR-10 x G10PR-56389R2	Set3	Year_2016	Plains	Rep2	215	6	46	3268.35	40.2	18.47	NA
G14-1694R2	Pop2	G10PR-10 x G10PR-56389R2	Set3	Year_2016	Plains	Rep2	226	7	42	3012.8	37.88	20.75	NA
G14-1695R2	Pop2	G10PR-10 x G10PR-56389R2	Set3	Year_2016	Plains	Rep2	221	6	40	3806.35	40.81	18.63	NA
G14-1696R2	Pop2	G10PR-10 x G10PR-56389R2	Set3	Year_2016	Plains	Rep2	237	8	46	2891.75	39.04	20.18	NA
G14-1703R2	Pop2	G10PR-10 x G10PR-56389R2	Set3	Year_2016	Plains	Rep2	243	8	40	2138.55	39.22	20.59	NA
G14-1709R2	Pop2	G10PR-10 x G10PR-56389R2	Set3	Year_2016	Plains	Rep2	209	5	47	3961.03	40.23	19.65	NA
G14-1710R2	Pop2	G10PR-10 x G10PR-56389R2	Set3	Year_2016	Plains	Rep2	201	5	39	3362.5	40.32	20.56	NA
G14-1746R2	Pop2	G10PR-10 x G10PR-56389R2	Set3	Year_2016	Plains	Rep2	235	8	48	3322.15	39.18	19.67	NA
G14-1751R2	Pop2	G10PR-10 x G10PR-56389R2	Set3	Year_2016	Plains	Rep2	234	8	49	4384.7	40.4	19.86	NA
G14-1768R2	Pop2	G10PR-10 x G10PR-56389R2	Set3	Year_2016	Plains	Rep2	232	7	48	3759.28	41.33	19.33	NA
G14-1776R2	Pop2	G10PR-10 x G10PR-56389R2	Set3	Year_2016	Plains	Rep2	214	6	47	3981.2	40.37	20.33	NA
G14-1779R2	Pop2	G10PR-10 x G10PR-56389R2	Set3	Year_2016	Plains	Rep2	242	8	41	2313.4	40.62	20.35	NA
G14-1782R2	Pop2	G10PR-10 x G10PR-56389R2	Set3	Year_2016	Plains	Rep2	239	8	44	3382.68	41.44	18.88	NA
G14-1790R2	Pop2	G10PR-10 x G10PR-56389R2	Set3	Year_2016	Plains	Rep2	244	8	39	4162.77	39.55	19.72	NA
G14-1793R2	Pop2	G10PR-10 x G10PR-56389R2	Set3	Year_2016	Plains	Rep2	223	7	39	3221.28	41.75	19.03	NA
G14-1799R2	Pop2	G10PR-10 x G10PR-56389R2	Set3	Year_2016	Plains	Rep2	236	8	47	4875.62	38.63	19.51	NA
G14-1808R2	Pop2	G10PR-10 x G10PR-56389R2	Set3	Year_2016	Plains	Rep2	202	5	40	2918.65	40.4	18.67	NA
G14-1811R2	Pop2	G10PR-10 x G10PR-56389R2	Set3	Year_2016	Plains	Rep2	231	7	47	3947.57	40.73	20.5	NA
G14-1833R2	Pop2	G10PR-10 x G10PR-56389R2	Set3	Year_2016	Plains	Rep2	207	5	45	3577.7	43.13	19.02	NA
AG6534	check	check	Set3	Year_2016	Plains	Rep3	303	9	41	3100.22	42.01	20.18	NA
AG7733	check	check	Set3	Year_2016	Plains	Rep3	342	12	41	3100.22	41.43	18.96	NA
G14-1523R2	Pop2	G10PR-10 x G10PR-56389R2	Set3	Year_2016	Plains	Rep3	315	10	46	2642.93	42.2	18.59	NA
G14-1535R2	Pop2	G10PR-10 x G10PR-56389R2	Set3	Year_2016	Plains	Rep3	338	12	45	2589.12	41.94	19.59	NA
G14-1536R2	Pop2	G10PR-10 x G10PR-56389R2	Set3	Year_2016	Plains	Rep3	324	11	40	3510.45	40.31	19.29	NA
G14-1545R2	Pop2	G10PR-10 x G10PR-56389R2	Set3	Year_2016	Plains	Rep3	310	9	48	3335.6	40.11	19.01	NA
G14-1546R2	Pop2	G10PR-10 x G10PR-56389R2	Set3	Year_2016	Plains	Rep3	306	9	44	2562.22	42.85	19.54	NA
G14-1551R2	Pop2	G10PR-10 x G10PR-56389R2	Set3	Year_2016	Plains	Rep3	320	10	41	3053.15	38.92	20.04	NA
G14-1552R2	Pop2	G10PR-10 x G10PR-56389R2	Set3	Year_2016	Plains	Rep3	318	10	43	3584.43	41.26	18.81	NA
G14-1555R2	Pop2	G10PR-10 x G10PR-56389R2	Set3	Year_2016	Plains	Rep3	325	11	41	2911.93	40.92	19.73	NA
G14-1558R2	Pop2	G10PR-10 x G10PR-56389R2	Set3	Year_2016	Plains	Rep3	308	9	46	2044.4	38.43	19.14	NA
G14-1561R2	Pop2	G10PR-10 x G10PR-56389R2	Set3	Year_2016	Plains	Rep3	314	10	47	3463.38	40.85	19.39	NA
G14-1566R2	Pop2	G10PR-10 x G10PR-56389R2	Set3	Year_2016	Plains	Rep3	307	9	45	4559.55	39.33	19.34	NA
G14-1580R2	Pop2	G10PR-10 x G10PR-56389R2	Set3	Year_2016	Plains	Rep3	322	10	39	2508.43	42.01	18.43	NA
G14-1590R2	Pop2	G10PR-10 x G10PR-56389R2	Set3	Year_2016	Plains	Rep3	339	12	44	2777.43	42.61	18.55	NA
G14-1601R2	Pop2	G10PR-10 x G10PR-56389R2	Set3	Year_2016	Plains	Rep3	319	10	42	2911.93	42.78	18.5	NA
G14-1615R2	Pop2	G10PR-10 x G10PR-56389R2	Set3	Year_2016	Plains	Rep3	341	12	42	2811.05	43.7	18.65	NA
G14-1650R2	Pop2	G10PR-10 x G10PR-56389R2	Set3	Year_2016	Plains	Rep3	323	11	39	2622.75	41.09	19.92	NA
G14-1663R2	Pop2	G10PR-10 x G10PR-56389R2	Set3	Year_2016	Plains	Rep3	302	9	40	2871.57	40.49	19.87	NA
G14-1664R2	Pop2	G10PR-10 x G10PR-56389R2	Set3	Year_2016	Plains	Rep3	312	10	49	3893.78	41.38	18.88	NA
G14-1665R2	Pop2	G10PR-10 x G10PR-56389R2	Set3	Year_2016	Plains	Rep3	330	11	46	3342.32	43.22	18.47	NA
G14-1666R2	Pop2	G10PR-10 x G10PR-56389R2	Set3	Year_2016	Plains	Rep3	321	10	40	3389.4	41.95	18.66	NA
G14-1668R2	Pop2	G10PR-10 x G10PR-56389R2	Set3	Year_2016	Plains	Rep3	326	11	42	2891.75	39.78	19.38	NA
G14-1687R2	Pop2	G10PR-10 x G10PR-56389R2	Set3	Year_2016	Plains	Rep3	304	9	42	2521.88	40.73	19.44	NA
G14-1688R2	Pop2	G10PR-10 x G10PR-56389R2	Set3	Year_2016	Plains	Rep3	327	11	43	2965.72	40.58	19.87	NA
G14-1690R2	Pop2	G10PR-10 x G10PR-56389R2	Set3	Year_2016	Plains	Rep3	332	11	48	3053.15	39.92	18.87	NA
G14-1694R2	Pop2	G10PR-10 x G10PR-56389R2	Set3	Year_2016	Plains	Rep3	340	12	43	2131.82	39.19	19.9	NA
G14-1695R2	Pop2	G10PR-10 x G10PR-56389R2	Set3	Year_2016	Plains	Rep3	336	12	47	3133.85	40.84	18.79	NA
G14-1696R2	Pop2	G10PR-10 x G10PR-56389R2	Set3	Year_2016	Plains	Rep3	311	9	49	3019.53	40.68	19.75	NA
G14-1703R2	Pop2	G10PR-10 x G10PR-56389R2	Set3	Year_2016	Plains	Rep3	313	10	48	2138.55	39.88	20.4	NA
G14-1709R2	Pop2	G10PR-10 x G10PR-56389R2	Set3	Year_2016	Plains	Rep3	305	9	43	3638.22	40.44	19.63	NA
G14-1710R2	Pop2	G10PR-10 x G10PR-56389R2	Set3	Year_2016	Plains	Rep3	317	10	44	3154.03	39.97	20.41	NA
G14-1746R2	Pop2	G10PR-10 x G10PR-56389R2	Set3	Year_2016	Plains	Rep3	343	12	40	2609.3	39.76	20.12	NA
G14-1751R2	Pop2	G10PR-10 x G10PR-56389R2	Set3	Year_2016	Plains	Rep3	301	9	39	3086.78	40.91	19.33	NA
G14-1768R2	Pop2	G10PR-10 x G10PR-56389R2	Set3	Year_2016	Plains	Rep3	335	12	48	2622.75	43.88	18	NA
G14-1776R2	Pop2	G10PR-10 x G10PR-56389R2	Set3	Year_2016	Plains	Rep3	316	10	45	3981.2	40.71	20.12	NA
G14-1779R2	Pop2	G10PR-10 x G10PR-56389R2	Set3	Year_2016	Plains	Rep3	333	11	49	2400.82	41.82	19.86	NA
G14-1782R2	Pop2	G10PR-10 x G10PR-56389R2	Set3	Year_2016	Plains	Rep3	331	11	47	3194.38	42.47	18.09	NA
G14-1790R2	Pop2	G10PR-10 x G10PR-56389R2	Set3	Year_2016	Plains	Rep3	334	12	49	2885.03	40.21	19.17	NA
G14-1793R2	Pop2	G10PR-10 x G10PR-56389R2	Set3	Year_2016	Plains	Rep3	328	11	44	2703.45	42.42	18.72	NA
G14-1799R2	Pop2	G10PR-10 x G10PR-56389R2	Set3	Year_2016	Plains	Rep3	309	9	47	4472.12	39.74	19.28	NA
G14-1808R2	Pop2	G10PR-10 x G10PR-56389R2	Set3	Year_2016	Plains	Rep3	344	12	39	2501.7	40.56	18.93	NA
G14-1811R2	Pop2	G10PR-10 x G10PR-56389R2	Set3	Year_2016	Plains	Rep3	329	11	45	2999.35	42.61	19.36	NA
G14-1833R2	Pop2	G10PR-10 x G10PR-56389R2	Set3	Year_2016	Plains	Rep3	337	12	46	2676.55	44.46	18.61	NA
AG6534	check	check	Set4	Year_2016	Plains	Rep1	127	15	43	2407.55	42.85	19.32	NA
AG7733	check	check	Set4	Year_2016	Plains	Rep1	114	14	47	3120.4	41.04	18.65	NA
G14-1532R2	Pop2	G10PR-10 x G10PR-56389R2	Set4	Year_2016	Plains	Rep1	122	14	39	2515.15	41.47	18.72	NA
G14-1541R2	Pop2	G10PR-10 x G10PR-56389R2	Set4	Year_2016	Plains	Rep1	141	16	42	2353.75	41.72	19.41	NA
G14-1542R2	Pop2	G10PR-10 x G10PR-56389R2	Set4	Year_2016	Plains	Rep1	101	13	39	2911.93	40.82	19.09	NA
G14-1544R2	Pop2	G10PR-10 x G10PR-56389R2	Set4	Year_2016	Plains	Rep1	136	16	47	2212.53	43.87	17.52	NA
G14-1581R2	Pop2	G10PR-10 x G10PR-56389R2	Set4	Year_2016	Plains	Rep1	126	15	42	2777.43	42.84	17.14	NA
G14-1582R2	Pop2	G10PR-10 x G10PR-56389R2	Set4	Year_2016	Plains	Rep1	144	16	39	2239.43	40.07	18.71	NA
G14-1586R2	Pop2	G10PR-10 x G10PR-56389R2	Set4	Year_2016	Plains	Rep1	104	13	42	2575.68	42.09	18.25	NA
G14-1587R2	Pop2	G10PR-10 x G10PR-56389R2	Set4	Year_2016	Plains	Rep1	124	15	40	2804.32	42.91	17.17	NA
G14-1592R2	Pop2	G10PR-10 x G10PR-56389R2	Set4	Year_2016	Plains	Rep1	106	13	44	2340.3	42.7	18.71	NA
G14-1597R2	Pop2	G10PR-10 x G10PR-56389R2	Set4	Year_2016	Plains	Rep1	132	15	48	2824.5	42.58	18.04	NA
G14-1599R2	Pop2	G10PR-10 x G10PR-56389R2	Set4	Year_2016	Plains	Rep1	115	14	46	2078.03	43.06	19.19	NA
G14-1603R2	Pop2	G10PR-10 x G10PR-56389R2	Set4	Year_2016	Plains	Rep1	128	15	44	2905.2	39.66	18.84	NA
G14-1605R2	Pop2	G10PR-10 x G10PR-56389R2	Set4	Year_2016	Plains	Rep1	116	14	45	3221.28	42.26	19.35	NA
G14-1607R2	Pop2	G10PR-10 x G10PR-56389R2	Set4	Year_2016	Plains	Rep1	123	15	39	2118.38	44.02	18.44	NA
G14-1608R2	Pop2	G10PR-10 x G10PR-56389R2	Set4	Year_2016	Plains	Rep1	142	16	41	2555.5	42.59	18.85	NA
G14-1610R2	Pop2	G10PR-10 x G10PR-56389R2	Set4	Year_2016	Plains	Rep1	109	13	47	2817.78	41.49	18.5	NA
G14-1616R2	Pop2	G10PR-10 x G10PR-56389R2	Set4	Year_2016	Plains	Rep1	130	15	46	2508.43	43.06	17.55	NA
G14-1629R2	Pop2	G10PR-10 x G10PR-56389R2	Set4	Year_2016	Plains	Rep1	121	14	40	2784.15	42.48	17.83	NA
G14-1631R2	Pop2	G10PR-10 x G10PR-56389R2	Set4	Year_2016	Plains	Rep1	120	14	41	2030.95	39.27	19.53	NA
G14-1632R2	Pop2	G10PR-10 x G10PR-56389R2	Set4	Year_2016	Plains	Rep1	125	15	41	1822.47	40.67	19.17	NA
G14-1633R2	Pop2	G10PR-10 x G10PR-56389R2	Set4	Year_2016	Plains	Rep1	107	13	45	2757.25	42.43	18.81	NA
G14-1640R2	Pop2	G10PR-10 x G10PR-56389R2	Set4	Year_2016	Plains	Rep1	113	14	48	3322.15	42.65	18.92	NA
G14-1652R2	Pop2	G10PR-10 x G10PR-56389R2	Set4	Year_2016	Plains	Rep1	110	13	48	2737.07	41.79	18.69	NA
G14-1653R2	Pop2	G10PR-10 x G10PR-56389R2	Set4	Year_2016	Plains	Rep1	133	15	49	2696.72	41.42	19.41	NA
G14-1654R2	Pop2	G10PR-10 x G10PR-56389R2	Set4	Year_2016	Plains	Rep1	102	13	40	2824.5	39.45	20.21	NA
G14-1657R2	Pop2	G10PR-10 x G10PR-56389R2	Set4	Year_2016	Plains	Rep1	129	15	45	2494.97	40.96	19.24	NA
G14-1659R2	Pop2	G10PR-10 x G10PR-56389R2	Set4	Year_2016	Plains	Rep1	111	13	49	1627.45	43.27	17.07	NA
G14-1661R2	Pop2	G10PR-10 x G10PR-56389R2	Set4	Year_2016	Plains	Rep1	140	16	43	1782.12	43.57	17.11	NA
G14-1676R2	Pop2	G10PR-10 x G10PR-56389R2	Set4	Year_2016	Plains	Rep1	118	14	43	3234.72	43.24	18.94	NA
G14-1707R2	Pop2	G10PR-10 x G10PR-56389R2	Set4	Year_2016	Plains	Rep1	137	16	46	3234.72	42	18.29	NA
G14-1716R2	Pop2	G10PR-10 x G10PR-56389R2	Set4	Year_2016	Plains	Rep1	134	16	49	2508.43	41.87	19.25	NA
G14-1737R2	Pop2	G10PR-10 x G10PR-56389R2	Set4	Year_2016	Plains	Rep1	108	13	46	2817.78	41.67	20.14	NA
G14-1747R2	Pop2	G10PR-10 x G10PR-56389R2	Set4	Year_2016	Plains	Rep1	117	14	44	2609.3	41.22	18.57	NA
G14-1752R2	Pop2	G10PR-10 x G10PR-56389R2	Set4	Year_2016	Plains	Rep1	143	16	40	2790.88	42.07	19.67	NA
G14-1753R2	Pop2	G10PR-10 x G10PR-56389R2	Set4	Year_2016	Plains	Rep1	135	16	48	2905.2	43	18.44	NA
G14-1755R2	Pop2	G10PR-10 x G10PR-56389R2	Set4	Year_2016	Plains	Rep1	131	15	47	2407.55	42.18	18.67	NA
G14-1758R2	Pop2	G10PR-10 x G10PR-56389R2	Set4	Year_2016	Plains	Rep1	119	14	42	2158.72	42.81	19.31	NA
G14-1795R2	Pop2	G10PR-10 x G10PR-56389R2	Set4	Year_2016	Plains	Rep1	138	16	45	2118.38	41.74	19.03	NA
G14-1796R2	Pop2	G10PR-10 x G10PR-56389R2	Set4	Year_2016	Plains	Rep1	105	13	43	2078.03	42.86	18.62	NA
G14-1801R2	Pop2	G10PR-10 x G10PR-56389R2	Set4	Year_2016	Plains	Rep1	139	16	44	1963.7	43.16	17.62	NA
G14-1817R2	Pop2	G10PR-10 x G10PR-56389R2	Set4	Year_2016	Plains	Rep1	103	13	41	2178.9	39.77	19.12	NA
G14-1819R2	Pop2	G10PR-10 x G10PR-56389R2	Set4	Year_2016	Plains	Rep1	112	14	49	2723.62	40.44	18.67	NA
AG6534	check	check	Set4	Year_2016	Plains	Rep2	223	19	39	2737.07	41.84	19.9	NA
AG7733	check	check	Set4	Year_2016	Plains	Rep2	209	17	47	2878.3	41.49	18.54	NA
G14-1532R2	Pop2	G10PR-10 x G10PR-56389R2	Set4	Year_2016	Plains	Rep2	233	19	49	2642.93	41.38	18.29	NA
G14-1541R2	Pop2	G10PR-10 x G10PR-56389R2	Set4	Year_2016	Plains	Rep2	213	18	48	3194.38	41.33	19.34	NA
G14-1542R2	Pop2	G10PR-10 x G10PR-56389R2	Set4	Year_2016	Plains	Rep2	218	18	43	2602.57	41.38	19.41	NA
G14-1544R2	Pop2	G10PR-10 x G10PR-56389R2	Set4	Year_2016	Plains	Rep2	207	17	45	2488.25	42.95	18.11	NA
G14-1581R2	Pop2	G10PR-10 x G10PR-56389R2	Set4	Year_2016	Plains	Rep2	230	19	46	3059.88	42.21	17.31	NA
G14-1582R2	Pop2	G10PR-10 x G10PR-56389R2	Set4	Year_2016	Plains	Rep2	204	17	42	2266.32	39.02	19.6	NA
G14-1586R2	Pop2	G10PR-10 x G10PR-56389R2	Set4	Year_2016	Plains	Rep2	224	19	40	2784.15	41.65	17.8	NA
G14-1587R2	Pop2	G10PR-10 x G10PR-56389R2	Set4	Year_2016	Plains	Rep2	237	20	46	3234.72	42.08	17.94	NA
G14-1592R2	Pop2	G10PR-10 x G10PR-56389R2	Set4	Year_2016	Plains	Rep2	210	17	48	2965.72	41.47	19.13	NA
G14-1597R2	Pop2	G10PR-10 x G10PR-56389R2	Set4	Year_2016	Plains	Rep2	236	20	47	2347.03	43.16	17.25	NA
G14-1599R2	Pop2	G10PR-10 x G10PR-56389R2	Set4	Year_2016	Plains	Rep2	227	19	43	2084.75	42.23	19.31	NA
G14-1603R2	Pop2	G10PR-10 x G10PR-56389R2	Set4	Year_2016	Plains	Rep2	211	17	49	2985.9	39.35	19.06	NA
G14-1605R2	Pop2	G10PR-10 x G10PR-56389R2	Set4	Year_2016	Plains	Rep2	208	17	46	2784.15	42.58	19.39	NA
G14-1607R2	Pop2	G10PR-10 x G10PR-56389R2	Set4	Year_2016	Plains	Rep2	216	18	45	2400.82	44.29	18.57	NA
G14-1608R2	Pop2	G10PR-10 x G10PR-56389R2	Set4	Year_2016	Plains	Rep2	226	19	42	3147.3	42.43	18.83	NA
G14-1610R2	Pop2	G10PR-10 x G10PR-56389R2	Set4	Year_2016	Plains	Rep2	244	20	39	2501.7	41.61	19.12	NA
G14-1616R2	Pop2	G10PR-10 x G10PR-56389R2	Set4	Year_2016	Plains	Rep2	235	20	48	2965.72	42.74	18.71	NA
G14-1629R2	Pop2	G10PR-10 x G10PR-56389R2	Set4	Year_2016	Plains	Rep2	231	19	47	2548.78	42.1	17.85	NA
G14-1631R2	Pop2	G10PR-10 x G10PR-56389R2	Set4	Year_2016	Plains	Rep2	203	17	41	2125.1	38.85	19.34	NA
G14-1632R2	Pop2	G10PR-10 x G10PR-56389R2	Set4	Year_2016	Plains	Rep2	214	18	47	2703.45	39.63	19.91	NA
G14-1633R2	Pop2	G10PR-10 x G10PR-56389R2	Set4	Year_2016	Plains	Rep2	243	20	40	2777.43	42.17	18.96	NA
G14-1640R2	Pop2	G10PR-10 x G10PR-56389R2	Set4	Year_2016	Plains	Rep2	201	17	39	3086.78	42.55	18.88	NA
G14-1652R2	Pop2	G10PR-10 x G10PR-56389R2	Set4	Year_2016	Plains	Rep2	221	18	40	2212.53	42.46	18.46	NA
G14-1653R2	Pop2	G10PR-10 x G10PR-56389R2	Set4	Year_2016	Plains	Rep2	229	19	45	2723.62	41.75	19.01	NA
G14-1654R2	Pop2	G10PR-10 x G10PR-56389R2	Set4	Year_2016	Plains	Rep2	212	18	49	2817.78	41.31	19.27	NA
G14-1657R2	Pop2	G10PR-10 x G10PR-56389R2	Set4	Year_2016	Plains	Rep2	238	20	45	2676.55	40.65	18.95	NA
G14-1659R2	Pop2	G10PR-10 x G10PR-56389R2	Set4	Year_2016	Plains	Rep2	219	18	42	1614	43.13	17.67	NA
G14-1661R2	Pop2	G10PR-10 x G10PR-56389R2	Set4	Year_2016	Plains	Rep2	220	18	41	1667.8	44.14	16.92	NA
G14-1676R2	Pop2	G10PR-10 x G10PR-56389R2	Set4	Year_2016	Plains	Rep2	239	20	44	3436.47	43.23	18.29	NA
G14-1707R2	Pop2	G10PR-10 x G10PR-56389R2	Set4	Year_2016	Plains	Rep2	225	19	41	3275.07	41.06	18.72	NA
G14-1716R2	Pop2	G10PR-10 x G10PR-56389R2	Set4	Year_2016	Plains	Rep2	217	18	44	2481.53	42.09	18.64	NA
G14-1737R2	Pop2	G10PR-10 x G10PR-56389R2	Set4	Year_2016	Plains	Rep2	232	19	48	3248.18	40.82	19.75	NA
G14-1747R2	Pop2	G10PR-10 x G10PR-56389R2	Set4	Year_2016	Plains	Rep2	240	20	43	2535.32	40.99	18.6	NA
G14-1752R2	Pop2	G10PR-10 x G10PR-56389R2	Set4	Year_2016	Plains	Rep2	228	19	44	2885.03	42.06	19.58	NA
G14-1753R2	Pop2	G10PR-10 x G10PR-56389R2	Set4	Year_2016	Plains	Rep2	241	20	42	2568.95	42.36	18.72	NA
G14-1755R2	Pop2	G10PR-10 x G10PR-56389R2	Set4	Year_2016	Plains	Rep2	206	17	44	2273.05	40.95	19.4	NA
G14-1758R2	Pop2	G10PR-10 x G10PR-56389R2	Set4	Year_2016	Plains	Rep2	222	18	39	2454.62	42.65	19.13	NA
G14-1795R2	Pop2	G10PR-10 x G10PR-56389R2	Set4	Year_2016	Plains	Rep2	242	20	41	2609.3	41.67	18.5	NA
G14-1796R2	Pop2	G10PR-10 x G10PR-56389R2	Set4	Year_2016	Plains	Rep2	202	17	40	2743.8	41.19	20.1	NA
G14-1801R2	Pop2	G10PR-10 x G10PR-56389R2	Set4	Year_2016	Plains	Rep2	205	17	43	2340.3	41.8	18.59	NA
G14-1817R2	Pop2	G10PR-10 x G10PR-56389R2	Set4	Year_2016	Plains	Rep2	234	20	49	2441.18	39.3	18.92	NA
G14-1819R2	Pop2	G10PR-10 x G10PR-56389R2	Set4	Year_2016	Plains	Rep2	215	18	46	3039.7	40.71	19.03	NA
AG6534	check	check	Set4	Year_2016	Plains	Rep3	302	21	40	2582.4	41.93	20.21	NA
AG7733	check	check	Set4	Year_2016	Plains	Rep3	323	23	39	2589.12	41.33	18.42	NA
G14-1532R2	Pop2	G10PR-10 x G10PR-56389R2	Set4	Year_2016	Plains	Rep3	330	23	46	2494.97	41.9	17.88	NA
G14-1541R2	Pop2	G10PR-10 x G10PR-56389R2	Set4	Year_2016	Plains	Rep3	331	23	47	2979.18	40.92	19.42	NA
G14-1542R2	Pop2	G10PR-10 x G10PR-56389R2	Set4	Year_2016	Plains	Rep3	338	24	45	2985.9	41.32	18.87	NA
G14-1544R2	Pop2	G10PR-10 x G10PR-56389R2	Set4	Year_2016	Plains	Rep3	310	21	48	2273.05	43.27	17.34	NA
G14-1581R2	Pop2	G10PR-10 x G10PR-56389R2	Set4	Year_2016	Plains	Rep3	314	22	47	2992.62	42.03	17.84	NA
G14-1582R2	Pop2	G10PR-10 x G10PR-56389R2	Set4	Year_2016	Plains	Rep3	317	22	44	2582.4	39.25	19.31	NA
G14-1586R2	Pop2	G10PR-10 x G10PR-56389R2	Set4	Year_2016	Plains	Rep3	324	23	40	2797.6	41.15	17.57	NA
G14-1587R2	Pop2	G10PR-10 x G10PR-56389R2	Set4	Year_2016	Plains	Rep3	312	22	49	3281.8	41.6	18.17	NA
G14-1592R2	Pop2	G10PR-10 x G10PR-56389R2	Set4	Year_2016	Plains	Rep3	337	24	46	2286.5	42.2	18.26	NA
G14-1597R2	Pop2	G10PR-10 x G10PR-56389R2	Set4	Year_2016	Plains	Rep3	325	23	41	2763.97	42.47	17.81	NA
G14-1599R2	Pop2	G10PR-10 x G10PR-56389R2	Set4	Year_2016	Plains	Rep3	341	24	42	1936.8	42.28	18.69	NA
G14-1603R2	Pop2	G10PR-10 x G10PR-56389R2	Set4	Year_2016	Plains	Rep3	327	23	43	3019.53	38.99	19.03	NA
G14-1605R2	Pop2	G10PR-10 x G10PR-56389R2	Set4	Year_2016	Plains	Rep3	308	21	46	2616.03	41.95	19.14	NA
G14-1607R2	Pop2	G10PR-10 x G10PR-56389R2	Set4	Year_2016	Plains	Rep3	318	22	43	2394.1	43.84	18.35	NA
G14-1608R2	Pop2	G10PR-10 x G10PR-56389R2	Set4	Year_2016	Plains	Rep3	343	24	40	2286.5	42.41	18.49	NA
G14-1610R2	Pop2	G10PR-10 x G10PR-56389R2	Set4	Year_2016	Plains	Rep3	332	23	48	3073.32	41.14	18.36	NA
G14-1616R2	Pop2	G10PR-10 x G10PR-56389R2	Set4	Year_2016	Plains	Rep3	342	24	41	2279.78	42.97	18.36	NA
G14-1629R2	Pop2	G10PR-10 x G10PR-56389R2	Set4	Year_2016	Plains	Rep3	336	24	47	2461.35	42.06	18.08	NA
G14-1631R2	Pop2	G10PR-10 x G10PR-56389R2	Set4	Year_2016	Plains	Rep3	321	22	40	2299.95	39.03	18.81	NA
G14-1632R2	Pop2	G10PR-10 x G10PR-56389R2	Set4	Year_2016	Plains	Rep3	328	23	44	2232.7	39.49	19.84	NA
G14-1633R2	Pop2	G10PR-10 x G10PR-56389R2	Set4	Year_2016	Plains	Rep3	335	24	48	2568.95	42.32	18.94	NA
G14-1640R2	Pop2	G10PR-10 x G10PR-56389R2	Set4	Year_2016	Plains	Rep3	311	21	49	3476.82	42.85	19.01	NA
G14-1652R2	Pop2	G10PR-10 x G10PR-56389R2	Set4	Year_2016	Plains	Rep3	315	22	46	2400.82	42.94	17.87	NA
G14-1653R2	Pop2	G10PR-10 x G10PR-56389R2	Set4	Year_2016	Plains	Rep3	322	22	39	2723.62	41.73	18.82	NA
G14-1654R2	Pop2	G10PR-10 x G10PR-56389R2	Set4	Year_2016	Plains	Rep3	340	24	43	2360.47	41.29	19.13	NA
G14-1657R2	Pop2	G10PR-10 x G10PR-56389R2	Set4	Year_2016	Plains	Rep3	333	23	49	2911.93	40.48	19.18	NA
G14-1659R2	Pop2	G10PR-10 x G10PR-56389R2	Set4	Year_2016	Plains	Rep3	339	24	44	1674.53	43.47	16.99	NA
G14-1661R2	Pop2	G10PR-10 x G10PR-56389R2	Set4	Year_2016	Plains	Rep3	304	21	42	1667.8	43.52	17.04	NA
G14-1676R2	Pop2	G10PR-10 x G10PR-56389R2	Set4	Year_2016	Plains	Rep3	344	24	39	2589.12	44.14	17.86	NA
G14-1707R2	Pop2	G10PR-10 x G10PR-56389R2	Set4	Year_2016	Plains	Rep3	305	21	43	3032.97	41.36	18.84	NA
G14-1716R2	Pop2	G10PR-10 x G10PR-56389R2	Set4	Year_2016	Plains	Rep3	306	21	44	2252.88	41.65	18.69	NA
G14-1737R2	Pop2	G10PR-10 x G10PR-56389R2	Set4	Year_2016	Plains	Rep3	319	22	42	2589.12	41.43	19.97	NA
G14-1747R2	Pop2	G10PR-10 x G10PR-56389R2	Set4	Year_2016	Plains	Rep3	307	21	45	2757.25	40.97	19.07	NA
G14-1752R2	Pop2	G10PR-10 x G10PR-56389R2	Set4	Year_2016	Plains	Rep3	329	23	45	3080.05	41.29	19.8	NA
G14-1753R2	Pop2	G10PR-10 x G10PR-56389R2	Set4	Year_2016	Plains	Rep3	320	22	41	2636.2	43.04	18.22	NA
G14-1755R2	Pop2	G10PR-10 x G10PR-56389R2	Set4	Year_2016	Plains	Rep3	326	23	42	2468.07	40.55	18.81	NA
G14-1758R2	Pop2	G10PR-10 x G10PR-56389R2	Set4	Year_2016	Plains	Rep3	309	21	47	2427.72	43.16	19.45	NA
G14-1795R2	Pop2	G10PR-10 x G10PR-56389R2	Set4	Year_2016	Plains	Rep3	301	21	39	2293.22	42.78	18.93	NA
G14-1796R2	Pop2	G10PR-10 x G10PR-56389R2	Set4	Year_2016	Plains	Rep3	334	24	49	2266.32	42.03	19.29	NA
G14-1801R2	Pop2	G10PR-10 x G10PR-56389R2	Set4	Year_2016	Plains	Rep3	313	22	48	2508.43	42.17	18.53	NA
G14-1817R2	Pop2	G10PR-10 x G10PR-56389R2	Set4	Year_2016	Plains	Rep3	316	22	45	2528.6	39.41	18.67	NA
G14-1819R2	Pop2	G10PR-10 x G10PR-56389R2	Set4	Year_2016	Plains	Rep3	303	21	41	2481.53	40.97	18.5	NA
AG6534	check	check	Set5	Year_2015	Athens	Rep1	113	2	6	1936.8	NA	NA	51
AG7733	check	check	Set5	Year_2015	Athens	Rep1	128	4	9	3147.3	NA	NA	59
G14-1210R2	Pop3	G10PR-56248R2 x G10PR-56389R2	Set5	Year_2015	Athens	Rep1	132	4	5	2521.88	NA	NA	56
G14-1211R2	Pop3	G10PR-56248R2 x G10PR-56389R2	Set5	Year_2015	Athens	Rep1	131	4	6	3268.35	NA	NA	55
G14-1212R2	Pop3	G10PR-56248R2 x G10PR-56389R2	Set5	Year_2015	Athens	Rep1	118	2	1	3389.4	NA	NA	60
G14-1215R2	Pop3	G10PR-56248R2 x G10PR-56389R2	Set5	Year_2015	Athens	Rep1	119	3	1	2609.3	NA	NA	59
G14-1220R2	Pop3	G10PR-56248R2 x G10PR-56389R2	Set5	Year_2015	Athens	Rep1	125	3	7	3254.9	NA	NA	54
G14-1221R2	Pop3	G10PR-56248R2 x G10PR-56389R2	Set5	Year_2015	Athens	Rep1	102	1	2	2501.7	NA	NA	54
G14-1232R2	Pop3	G10PR-56248R2 x G10PR-56389R2	Set5	Year_2015	Athens	Rep1	127	3	9	3295.25	NA	NA	59
G14-1236R2	Pop3	G10PR-56248R2 x G10PR-56389R2	Set5	Year_2015	Athens	Rep1	133	4	4	3739.1	NA	NA	59
G14-1256R2	Pop3	G10PR-56248R2 x G10PR-56389R2	Set5	Year_2015	Athens	Rep1	109	1	9	3685.3	NA	NA	60
G14-1277R2	Pop3	G10PR-56248R2 x G10PR-56389R2	Set5	Year_2015	Athens	Rep1	138	5	2	2609.3	NA	NA	59
G14-1278R2	Pop3	G10PR-56248R2 x G10PR-56389R2	Set5	Year_2015	Athens	Rep1	103	1	3	3322.15	NA	NA	55
G14-1279R2	Pop3	G10PR-56248R2 x G10PR-56389R2	Set5	Year_2015	Athens	Rep1	134	4	3	3423.03	NA	NA	61
G14-1284R2	Pop3	G10PR-56248R2 x G10PR-56389R2	Set5	Year_2015	Athens	Rep1	122	3	4	2730.35	NA	NA	55
G14-1285R2	Pop3	G10PR-56248R2 x G10PR-56389R2	Set5	Year_2015	Athens	Rep1	104	1	4	2905.2	NA	NA	56
G14-1288R2	Pop3	G10PR-56248R2 x G10PR-56389R2	Set5	Year_2015	Athens	Rep1	124	3	6	2696.72	NA	NA	58
G14-1291R2	Pop3	G10PR-56248R2 x G10PR-56389R2	Set5	Year_2015	Athens	Rep1	114	2	5	3961.03	NA	NA	57
G14-1292R2	Pop3	G10PR-56248R2 x G10PR-56389R2	Set5	Year_2015	Athens	Rep1	143	5	7	3160.75	NA	NA	56
G14-1299R2	Pop3	G10PR-56248R2 x G10PR-56389R2	Set5	Year_2015	Athens	Rep1	140	5	4	3106.95	NA	NA	57
G14-1301R2	Pop3	G10PR-56248R2 x G10PR-56389R2	Set5	Year_2015	Athens	Rep1	129	4	8	3187.65	NA	NA	54
G14-1302R2	Pop3	G10PR-56248R2 x G10PR-56389R2	Set5	Year_2015	Athens	Rep1	107	1	7	3369.22	NA	NA	60
G14-1304R2	Pop3	G10PR-56248R2 x G10PR-56389R2	Set5	Year_2015	Athens	Rep1	144	5	8	3725.65	NA	NA	59
G14-1307R2	Pop3	G10PR-56248R2 x G10PR-56389R2	Set5	Year_2015	Athens	Rep1	120	3	2	3180.93	NA	NA	58
G14-1324R2	Pop3	G10PR-56248R2 x G10PR-56389R2	Set5	Year_2015	Athens	Rep1	142	5	6	2622.75	NA	NA	53
G14-1342R2	Pop3	G10PR-56248R2 x G10PR-56389R2	Set5	Year_2015	Athens	Rep1	106	1	6	2811.05	NA	NA	51
G14-1345R2	Pop3	G10PR-56248R2 x G10PR-56389R2	Set5	Year_2015	Athens	Rep1	110	2	9	3362.5	NA	NA	56
G14-1346R2	Pop3	G10PR-56248R2 x G10PR-56389R2	Set5	Year_2015	Athens	Rep1	117	2	2	2965.72	NA	NA	55
G14-1351R2	Pop3	G10PR-56248R2 x G10PR-56389R2	Set5	Year_2015	Athens	Rep1	101	1	1	2979.18	NA	NA	53
G14-1362R2	Pop3	G10PR-56248R2 x G10PR-56389R2	Set5	Year_2015	Athens	Rep1	137	5	1	3046.43	NA	NA	56
G14-1363R2	Pop3	G10PR-56248R2 x G10PR-56389R2	Set5	Year_2015	Athens	Rep1	123	3	5	2831.22	NA	NA	59
G14-1365R2	Pop3	G10PR-56248R2 x G10PR-56389R2	Set5	Year_2015	Athens	Rep1	116	2	3	3860.15	NA	NA	59
G14-1366R2	Pop3	G10PR-56248R2 x G10PR-56389R2	Set5	Year_2015	Athens	Rep1	130	4	7	3167.47	NA	NA	53
G14-1370R2	Pop3	G10PR-56248R2 x G10PR-56389R2	Set5	Year_2015	Athens	Rep1	126	3	8	2172.18	NA	NA	50
G14-1390R2	Pop3	G10PR-56248R2 x G10PR-56389R2	Set5	Year_2015	Athens	Rep1	115	2	4	2804.32	NA	NA	57
G14-1393R2	Pop3	G10PR-56248R2 x G10PR-56389R2	Set5	Year_2015	Athens	Rep1	139	5	3	3880.32	NA	NA	55
G14-1394R2	Pop3	G10PR-56248R2 x G10PR-56389R2	Set5	Year_2015	Athens	Rep1	141	5	5	2656.38	NA	NA	54
G14-1440R2	Pop3	G10PR-56248R2 x G10PR-56389R2	Set5	Year_2015	Athens	Rep1	112	2	7	2985.9	NA	NA	55
G14-1450R2	Pop3	G10PR-56248R2 x G10PR-56389R2	Set5	Year_2015	Athens	Rep1	135	4	2	2817.78	NA	NA	53
G14-1462R2	Pop3	G10PR-56248R2 x G10PR-56389R2	Set5	Year_2015	Athens	Rep1	111	2	8	2568.95	NA	NA	55
G14-1469R2	Pop3	G10PR-56248R2 x G10PR-56389R2	Set5	Year_2015	Athens	Rep1	105	1	5	2622.75	NA	NA	52
G14-1471R2	Pop3	G10PR-56248R2 x G10PR-56389R2	Set5	Year_2015	Athens	Rep1	136	4	1	2844.68	NA	NA	59
G14-1515R2	Pop3	G10PR-56248R2 x G10PR-56389R2	Set5	Year_2015	Athens	Rep1	121	3	3	3026.25	NA	NA	58
G14-1518R2	Pop3	G10PR-56248R2 x G10PR-56389R2	Set5	Year_2015	Athens	Rep1	108	1	8	2676.55	NA	NA	56
AG6534	check	check	Set5	Year_2015	Athens	Rep2	203	6	7	2259.6	NA	NA	50
AG7733	check	check	Set5	Year_2015	Athens	Rep2	235	9	8	3570.97	NA	NA	56
G14-1210R2	Pop3	G10PR-56248R2 x G10PR-56389R2	Set5	Year_2015	Athens	Rep2	225	8	3	3194.38	NA	NA	52
G14-1211R2	Pop3	G10PR-56248R2 x G10PR-56389R2	Set5	Year_2015	Athens	Rep2	232	9	5	2992.62	NA	NA	59
G14-1212R2	Pop3	G10PR-56248R2 x G10PR-56389R2	Set5	Year_2015	Athens	Rep2	244	10	2	4122.43	NA	NA	60
G14-1215R2	Pop3	G10PR-56248R2 x G10PR-56389R2	Set5	Year_2015	Athens	Rep2	207	6	3	2696.72	NA	NA	59
G14-1220R2	Pop3	G10PR-56248R2 x G10PR-56389R2	Set5	Year_2015	Athens	Rep2	201	6	9	3382.68	NA	NA	52
G14-1221R2	Pop3	G10PR-56248R2 x G10PR-56389R2	Set5	Year_2015	Athens	Rep2	231	9	4	3019.53	NA	NA	59
G14-1232R2	Pop3	G10PR-56248R2 x G10PR-56389R2	Set5	Year_2015	Athens	Rep2	242	10	4	3322.15	NA	NA	56
G14-1236R2	Pop3	G10PR-56248R2 x G10PR-56389R2	Set5	Year_2015	Athens	Rep2	220	8	8	4008.1	NA	NA	57
G14-1256R2	Pop3	G10PR-56248R2 x G10PR-56389R2	Set5	Year_2015	Athens	Rep2	229	9	2	4068.62	NA	NA	59
G14-1277R2	Pop3	G10PR-56248R2 x G10PR-56389R2	Set5	Year_2015	Athens	Rep2	210	7	1	3113.68	NA	NA	56
G14-1278R2	Pop3	G10PR-56248R2 x G10PR-56389R2	Set5	Year_2015	Athens	Rep2	202	6	8	3604.6	NA	NA	55
G14-1279R2	Pop3	G10PR-56248R2 x G10PR-56389R2	Set5	Year_2015	Athens	Rep2	204	6	6	3698.75	NA	NA	59
G14-1284R2	Pop3	G10PR-56248R2 x G10PR-56389R2	Set5	Year_2015	Athens	Rep2	241	10	5	2730.35	NA	NA	55
G14-1285R2	Pop3	G10PR-56248R2 x G10PR-56389R2	Set5	Year_2015	Athens	Rep2	214	7	5	3106.95	NA	NA	52
G14-1288R2	Pop3	G10PR-56248R2 x G10PR-56389R2	Set5	Year_2015	Athens	Rep2	237	10	9	3234.72	NA	NA	54
G14-1291R2	Pop3	G10PR-56248R2 x G10PR-56389R2	Set5	Year_2015	Athens	Rep2	227	8	1	4243.48	NA	NA	55
G14-1292R2	Pop3	G10PR-56248R2 x G10PR-56389R2	Set5	Year_2015	Athens	Rep2	213	7	4	3638.22	NA	NA	53
G14-1299R2	Pop3	G10PR-56248R2 x G10PR-56389R2	Set5	Year_2015	Athens	Rep2	218	7	9	3254.9	NA	NA	54
G14-1301R2	Pop3	G10PR-56248R2 x G10PR-56389R2	Set5	Year_2015	Athens	Rep2	221	8	7	3423.03	NA	NA	50
G14-1302R2	Pop3	G10PR-56248R2 x G10PR-56389R2	Set5	Year_2015	Athens	Rep2	222	8	6	3766	NA	NA	59
G14-1304R2	Pop3	G10PR-56248R2 x G10PR-56389R2	Set5	Year_2015	Athens	Rep2	233	9	6	3248.18	NA	NA	61
G14-1307R2	Pop3	G10PR-56248R2 x G10PR-56389R2	Set5	Year_2015	Athens	Rep2	226	8	2	3557.53	NA	NA	55
G14-1324R2	Pop3	G10PR-56248R2 x G10PR-56389R2	Set5	Year_2015	Athens	Rep2	212	7	3	2582.4	NA	NA	50
G14-1342R2	Pop3	G10PR-56248R2 x G10PR-56389R2	Set5	Year_2015	Athens	Rep2	240	10	6	2730.35	NA	NA	53
G14-1345R2	Pop3	G10PR-56248R2 x G10PR-56389R2	Set5	Year_2015	Athens	Rep2	215	7	6	3772.72	NA	NA	50
G14-1346R2	Pop3	G10PR-56248R2 x G10PR-56389R2	Set5	Year_2015	Athens	Rep2	224	8	4	3268.35	NA	NA	51
G14-1351R2	Pop3	G10PR-56248R2 x G10PR-56389R2	Set5	Year_2015	Athens	Rep2	236	9	9	3510.45	NA	NA	53
G14-1362R2	Pop3	G10PR-56248R2 x G10PR-56389R2	Set5	Year_2015	Athens	Rep2	223	8	5	3026.25	NA	NA	55
G14-1363R2	Pop3	G10PR-56248R2 x G10PR-56389R2	Set5	Year_2015	Athens	Rep2	234	9	7	2468.07	NA	NA	59
G14-1365R2	Pop3	G10PR-56248R2 x G10PR-56389R2	Set5	Year_2015	Athens	Rep2	228	9	1	4135.88	NA	NA	58
G14-1366R2	Pop3	G10PR-56248R2 x G10PR-56389R2	Set5	Year_2015	Athens	Rep2	205	6	5	2743.8	NA	NA	50
G14-1370R2	Pop3	G10PR-56248R2 x G10PR-56389R2	Set5	Year_2015	Athens	Rep2	216	7	7	2757.25	NA	NA	50
G14-1390R2	Pop3	G10PR-56248R2 x G10PR-56389R2	Set5	Year_2015	Athens	Rep2	206	6	4	3194.38	NA	NA	52
G14-1393R2	Pop3	G10PR-56248R2 x G10PR-56389R2	Set5	Year_2015	Athens	Rep2	217	7	8	4270.38	NA	NA	51
G14-1394R2	Pop3	G10PR-56248R2 x G10PR-56389R2	Set5	Year_2015	Athens	Rep2	230	9	3	3315.43	NA	NA	59
G14-1440R2	Pop3	G10PR-56248R2 x G10PR-56389R2	Set5	Year_2015	Athens	Rep2	239	10	7	3335.6	NA	NA	51
G14-1450R2	Pop3	G10PR-56248R2 x G10PR-56389R2	Set5	Year_2015	Athens	Rep2	209	6	1	3012.8	NA	NA	53
G14-1462R2	Pop3	G10PR-56248R2 x G10PR-56389R2	Set5	Year_2015	Athens	Rep2	238	10	8	3355.78	NA	NA	51
G14-1469R2	Pop3	G10PR-56248R2 x G10PR-56389R2	Set5	Year_2015	Athens	Rep2	219	8	9	3382.68	NA	NA	51
G14-1471R2	Pop3	G10PR-56248R2 x G10PR-56389R2	Set5	Year_2015	Athens	Rep2	243	10	3	3537.35	NA	NA	59
G14-1515R2	Pop3	G10PR-56248R2 x G10PR-56389R2	Set5	Year_2015	Athens	Rep2	208	6	2	3295.25	NA	NA	57
G14-1518R2	Pop3	G10PR-56248R2 x G10PR-56389R2	Set5	Year_2015	Athens	Rep2	211	7	2	3093.5	NA	NA	52
AG6534	check	check	Set6	Year_2015	Athens	Rep1	119	3	10	2730.35	NA	NA	52
AG7733	check	check	Set6	Year_2015	Athens	Rep1	113	2	15	2878.3	NA	NA	58
G14-1216R2	Pop3	G10PR-56248R2 x G10PR-56389R2	Set6	Year_2015	Athens	Rep1	132	4	14	3409.57	NA	NA	58
G14-1217R2	Pop3	G10PR-56248R2 x G10PR-56389R2	Set6	Year_2015	Athens	Rep1	123	3	14	3093.5	NA	NA	58
G14-1218R2	Pop3	G10PR-56248R2 x G10PR-56389R2	Set6	Year_2015	Athens	Rep1	138	5	11	3597.88	NA	NA	58
G14-1222R2	Pop3	G10PR-56248R2 x G10PR-56389R2	Set6	Year_2015	Athens	Rep1	143	5	16	3443.2	NA	NA	55
G14-1234R2	Pop3	G10PR-56248R2 x G10PR-56389R2	Set6	Year_2015	Athens	Rep1	124	3	15	3073.32	NA	NA	59
G14-1259R2	Pop3	G10PR-56248R2 x G10PR-56389R2	Set6	Year_2015	Athens	Rep1	114	2	14	3712.2	NA	NA	58
G14-1282R2	Pop3	G10PR-56248R2 x G10PR-56389R2	Set6	Year_2015	Athens	Rep1	129	4	17	3053.15	NA	NA	56
G14-1290R2	Pop3	G10PR-56248R2 x G10PR-56389R2	Set6	Year_2015	Athens	Rep1	103	1	12	2542.05	NA	NA	67
G14-1314R2	Pop3	G10PR-56248R2 x G10PR-56389R2	Set6	Year_2015	Athens	Rep1	101	1	10	2790.88	NA	NA	60
G14-1318R2	Pop3	G10PR-56248R2 x G10PR-56389R2	Set6	Year_2015	Athens	Rep1	115	2	13	2690	NA	NA	58
G14-1323R2	Pop3	G10PR-56248R2 x G10PR-56389R2	Set6	Year_2015	Athens	Rep1	106	1	15	2824.5	NA	NA	57
G14-1329R2	Pop3	G10PR-56248R2 x G10PR-56389R2	Set6	Year_2015	Athens	Rep1	122	3	13	2790.88	NA	NA	56
G14-1331R2	Pop3	G10PR-56248R2 x G10PR-56389R2	Set6	Year_2015	Athens	Rep1	144	5	17	3234.72	NA	NA	54
G14-1334R2	Pop3	G10PR-56248R2 x G10PR-56389R2	Set6	Year_2015	Athens	Rep1	137	5	10	3382.68	NA	NA	56
G14-1336R2	Pop3	G10PR-56248R2 x G10PR-56389R2	Set6	Year_2015	Athens	Rep1	111	2	17	3355.78	NA	NA	58
G14-1337R2	Pop3	G10PR-56248R2 x G10PR-56389R2	Set6	Year_2015	Athens	Rep1	107	1	16	3201.1	NA	NA	55
G14-1341R2	Pop3	G10PR-56248R2 x G10PR-56389R2	Set6	Year_2015	Athens	Rep1	118	2	10	2763.97	NA	NA	58
G14-1344R2	Pop3	G10PR-56248R2 x G10PR-56389R2	Set6	Year_2015	Athens	Rep1	130	4	16	3268.35	NA	NA	59
G14-1352R2	Pop3	G10PR-56248R2 x G10PR-56389R2	Set6	Year_2015	Athens	Rep1	116	2	12	2992.62	NA	NA	58
G14-1353R2	Pop3	G10PR-56248R2 x G10PR-56389R2	Set6	Year_2015	Athens	Rep1	140	5	13	3725.65	NA	NA	56
G14-1367R2	Pop3	G10PR-56248R2 x G10PR-56389R2	Set6	Year_2015	Athens	Rep1	125	3	16	2629.47	NA	NA	56
G14-1380R2	Pop3	G10PR-56248R2 x G10PR-56389R2	Set6	Year_2015	Athens	Rep1	134	4	12	3019.53	NA	NA	58
G14-1386R2	Pop3	G10PR-56248R2 x G10PR-56389R2	Set6	Year_2015	Athens	Rep1	127	3	18	2831.22	NA	NA	56
G14-1387R2	Pop3	G10PR-56248R2 x G10PR-56389R2	Set6	Year_2015	Athens	Rep1	141	5	14	3396.12	NA	NA	55
G14-1388R2	Pop3	G10PR-56248R2 x G10PR-56389R2	Set6	Year_2015	Athens	Rep1	136	4	10	3389.4	NA	NA	56
G14-1403R2	Pop3	G10PR-56248R2 x G10PR-56389R2	Set6	Year_2015	Athens	Rep1	102	1	11	2676.55	NA	NA	59
G14-1408R2	Pop3	G10PR-56248R2 x G10PR-56389R2	Set6	Year_2015	Athens	Rep1	139	5	12	3570.97	NA	NA	60
G14-1412R2	Pop3	G10PR-56248R2 x G10PR-56389R2	Set6	Year_2015	Athens	Rep1	110	2	18	2380.65	NA	NA	58
G14-1413R2	Pop3	G10PR-56248R2 x G10PR-56389R2	Set6	Year_2015	Athens	Rep1	117	2	11	2790.88	NA	NA	59
G14-1414R2	Pop3	G10PR-56248R2 x G10PR-56389R2	Set6	Year_2015	Athens	Rep1	128	4	18	3160.75	NA	NA	58
G14-1415R2	Pop3	G10PR-56248R2 x G10PR-56389R2	Set6	Year_2015	Athens	Rep1	112	2	16	3436.47	NA	NA	58
G14-1436R2	Pop3	G10PR-56248R2 x G10PR-56389R2	Set6	Year_2015	Athens	Rep1	120	3	11	3355.78	NA	NA	54
G14-1443R2	Pop3	G10PR-56248R2 x G10PR-56389R2	Set6	Year_2015	Athens	Rep1	108	1	17	2965.72	NA	NA	56
G14-1452R2	Pop3	G10PR-56248R2 x G10PR-56389R2	Set6	Year_2015	Athens	Rep1	104	1	13	2878.3	NA	NA	60
G14-1460R2	Pop3	G10PR-56248R2 x G10PR-56389R2	Set6	Year_2015	Athens	Rep1	121	3	12	3147.3	NA	NA	60
G14-1461R2	Pop3	G10PR-56248R2 x G10PR-56389R2	Set6	Year_2015	Athens	Rep1	105	1	14	2831.22	NA	NA	60
G14-1472R2	Pop3	G10PR-56248R2 x G10PR-56389R2	Set6	Year_2015	Athens	Rep1	135	4	11	3275.07	NA	NA	58
G14-1473R2	Pop3	G10PR-56248R2 x G10PR-56389R2	Set6	Year_2015	Athens	Rep1	131	4	15	3382.68	NA	NA	58
G14-1478R2	Pop3	G10PR-56248R2 x G10PR-56389R2	Set6	Year_2015	Athens	Rep1	142	5	15	3167.47	NA	NA	56
G14-1487R2	Pop3	G10PR-56248R2 x G10PR-56389R2	Set6	Year_2015	Athens	Rep1	109	1	18	2905.2	NA	NA	58
G14-1493R2	Pop3	G10PR-56248R2 x G10PR-56389R2	Set6	Year_2015	Athens	Rep1	126	3	17	2730.35	NA	NA	53
G14-1504R2	Pop3	G10PR-56248R2 x G10PR-56389R2	Set6	Year_2015	Athens	Rep1	133	4	13	3315.43	NA	NA	56
AG6534	check	check	Set6	Year_2015	Athens	Rep2	239	10	16	2757.25	NA	NA	52
AG7733	check	check	Set6	Year_2015	Athens	Rep2	236	9	18	2373.93	NA	NA	58
G14-1216R2	Pop3	G10PR-56248R2 x G10PR-56389R2	Set6	Year_2015	Athens	Rep2	244	10	11	3644.95	NA	NA	56
G14-1217R2	Pop3	G10PR-56248R2 x G10PR-56389R2	Set6	Year_2015	Athens	Rep2	240	10	15	2784.15	NA	NA	59
G14-1218R2	Pop3	G10PR-56248R2 x G10PR-56389R2	Set6	Year_2015	Athens	Rep2	201	6	18	3725.65	NA	NA	58
G14-1222R2	Pop3	G10PR-56248R2 x G10PR-56389R2	Set6	Year_2015	Athens	Rep2	242	10	13	3241.45	NA	NA	56
G14-1234R2	Pop3	G10PR-56248R2 x G10PR-56389R2	Set6	Year_2015	Athens	Rep2	202	6	17	3234.72	NA	NA	59
G14-1259R2	Pop3	G10PR-56248R2 x G10PR-56389R2	Set6	Year_2015	Athens	Rep2	220	8	17	2938.82	NA	NA	58
G14-1282R2	Pop3	G10PR-56248R2 x G10PR-56389R2	Set6	Year_2015	Athens	Rep2	224	8	13	3322.15	NA	NA	58
G14-1290R2	Pop3	G10PR-56248R2 x G10PR-56389R2	Set6	Year_2015	Athens	Rep2	215	7	15	3106.95	NA	NA	61
G14-1314R2	Pop3	G10PR-56248R2 x G10PR-56389R2	Set6	Year_2015	Athens	Rep2	233	9	15	2965.72	NA	NA	59
G14-1318R2	Pop3	G10PR-56248R2 x G10PR-56389R2	Set6	Year_2015	Athens	Rep2	207	6	12	3127.12	NA	NA	58
G14-1323R2	Pop3	G10PR-56248R2 x G10PR-56389R2	Set6	Year_2015	Athens	Rep2	227	8	10	3315.43	NA	NA	54
G14-1329R2	Pop3	G10PR-56248R2 x G10PR-56389R2	Set6	Year_2015	Athens	Rep2	226	8	11	3295.25	NA	NA	55
G14-1331R2	Pop3	G10PR-56248R2 x G10PR-56389R2	Set6	Year_2015	Athens	Rep2	229	9	11	3019.53	NA	NA	55
G14-1334R2	Pop3	G10PR-56248R2 x G10PR-56389R2	Set6	Year_2015	Athens	Rep2	241	10	14	2784.15	NA	NA	59
G14-1336R2	Pop3	G10PR-56248R2 x G10PR-56389R2	Set6	Year_2015	Athens	Rep2	212	7	12	3429.75	NA	NA	55
G14-1337R2	Pop3	G10PR-56248R2 x G10PR-56389R2	Set6	Year_2015	Athens	Rep2	243	10	12	3281.8	NA	NA	52
G14-1341R2	Pop3	G10PR-56248R2 x G10PR-56389R2	Set6	Year_2015	Athens	Rep2	225	8	12	3436.47	NA	NA	58
G14-1344R2	Pop3	G10PR-56248R2 x G10PR-56389R2	Set6	Year_2015	Athens	Rep2	238	10	17	3335.6	NA	NA	59
G14-1352R2	Pop3	G10PR-56248R2 x G10PR-56389R2	Set6	Year_2015	Athens	Rep2	230	9	12	3362.5	NA	NA	56
G14-1353R2	Pop3	G10PR-56248R2 x G10PR-56389R2	Set6	Year_2015	Athens	Rep2	228	9	10	2891.75	NA	NA	54
G14-1367R2	Pop3	G10PR-56248R2 x G10PR-56389R2	Set6	Year_2015	Athens	Rep2	235	9	17	2622.75	NA	NA	58
G14-1380R2	Pop3	G10PR-56248R2 x G10PR-56389R2	Set6	Year_2015	Athens	Rep2	204	6	15	2911.93	NA	NA	55
G14-1386R2	Pop3	G10PR-56248R2 x G10PR-56389R2	Set6	Year_2015	Athens	Rep2	216	7	16	2447.9	NA	NA	56
G14-1387R2	Pop3	G10PR-56248R2 x G10PR-56389R2	Set6	Year_2015	Athens	Rep2	237	10	18	2817.78	NA	NA	54
G14-1388R2	Pop3	G10PR-56248R2 x G10PR-56389R2	Set6	Year_2015	Athens	Rep2	231	9	13	3032.97	NA	NA	58
G14-1403R2	Pop3	G10PR-56248R2 x G10PR-56389R2	Set6	Year_2015	Athens	Rep2	206	6	13	3382.68	NA	NA	58
G14-1408R2	Pop3	G10PR-56248R2 x G10PR-56389R2	Set6	Year_2015	Athens	Rep2	232	9	14	3228	NA	NA	58
G14-1412R2	Pop3	G10PR-56248R2 x G10PR-56389R2	Set6	Year_2015	Athens	Rep2	205	6	14	2891.75	NA	NA	55
G14-1413R2	Pop3	G10PR-56248R2 x G10PR-56389R2	Set6	Year_2015	Athens	Rep2	219	8	18	2642.93	NA	NA	58
G14-1414R2	Pop3	G10PR-56248R2 x G10PR-56389R2	Set6	Year_2015	Athens	Rep2	223	8	14	3557.53	NA	NA	57
G14-1415R2	Pop3	G10PR-56248R2 x G10PR-56389R2	Set6	Year_2015	Athens	Rep2	211	7	11	3497	NA	NA	54
G14-1436R2	Pop3	G10PR-56248R2 x G10PR-56389R2	Set6	Year_2015	Athens	Rep2	214	7	14	3443.2	NA	NA	52
G14-1443R2	Pop3	G10PR-56248R2 x G10PR-56389R2	Set6	Year_2015	Athens	Rep2	209	6	10	3012.8	NA	NA	55
G14-1452R2	Pop3	G10PR-56248R2 x G10PR-56389R2	Set6	Year_2015	Athens	Rep2	208	6	11	3355.78	NA	NA	60
G14-1460R2	Pop3	G10PR-56248R2 x G10PR-56389R2	Set6	Year_2015	Athens	Rep2	222	8	15	3234.72	NA	NA	58
G14-1461R2	Pop3	G10PR-56248R2 x G10PR-56389R2	Set6	Year_2015	Athens	Rep2	218	7	18	2952.28	NA	NA	59
G14-1472R2	Pop3	G10PR-56248R2 x G10PR-56389R2	Set6	Year_2015	Athens	Rep2	210	7	10	2985.9	NA	NA	55
G14-1473R2	Pop3	G10PR-56248R2 x G10PR-56389R2	Set6	Year_2015	Athens	Rep2	203	6	16	3631.5	NA	NA	58
G14-1478R2	Pop3	G10PR-56248R2 x G10PR-56389R2	Set6	Year_2015	Athens	Rep2	234	9	16	3053.15	NA	NA	55
G14-1487R2	Pop3	G10PR-56248R2 x G10PR-56389R2	Set6	Year_2015	Athens	Rep2	221	8	16	3261.62	NA	NA	58
G14-1493R2	Pop3	G10PR-56248R2 x G10PR-56389R2	Set6	Year_2015	Athens	Rep2	213	7	13	3127.12	NA	NA	54
G14-1504R2	Pop3	G10PR-56248R2 x G10PR-56389R2	Set6	Year_2015	Athens	Rep2	217	7	17	2750.53	NA	NA	55
AG6534	check	check	Set5	Year_2016	Athens	Rep1	115	2	55	3907.22	41.17	20.49	46
AG7733	check	check	Set5	Year_2016	Athens	Rep1	122	2	48	3349.05	41.65	19.49	48
G14-1210R2	Pop3	G10PR-56248R2 x G10PR-56389R2	Set5	Year_2016	Athens	Rep1	109	1	56	4028.28	43.96	17.64	46
G14-1211R2	Pop3	G10PR-56248R2 x G10PR-56389R2	Set5	Year_2016	Athens	Rep1	134	4	58	3147.3	42.59	19.48	46
G14-1212R2	Pop3	G10PR-56248R2 x G10PR-56389R2	Set5	Year_2016	Athens	Rep1	102	1	49	3059.88	43.05	19.46	48
G14-1215R2	Pop3	G10PR-56248R2 x G10PR-56389R2	Set5	Year_2016	Athens	Rep1	108	1	55	2858.12	44.05	16.75	46
G14-1220R2	Pop3	G10PR-56248R2 x G10PR-56389R2	Set5	Year_2016	Athens	Rep1	105	1	52	2945.55	43.03	20.27	46
G14-1221R2	Pop3	G10PR-56248R2 x G10PR-56389R2	Set5	Year_2016	Athens	Rep1	104	1	51	2582.4	44	18.35	46
G14-1232R2	Pop3	G10PR-56248R2 x G10PR-56389R2	Set5	Year_2016	Athens	Rep1	126	3	51	2918.65	43.04	18.89	46
G14-1236R2	Pop3	G10PR-56248R2 x G10PR-56389R2	Set5	Year_2016	Athens	Rep1	138	4	54	3160.75	41.3	19.12	48
G14-1256R2	Pop3	G10PR-56248R2 x G10PR-56389R2	Set5	Year_2016	Athens	Rep1	106	1	53	2757.25	43.62	18.62	44
G14-1277R2	Pop3	G10PR-56248R2 x G10PR-56389R2	Set5	Year_2016	Athens	Rep1	125	3	50	3342.32	43.21	19.16	47
G14-1278R2	Pop3	G10PR-56248R2 x G10PR-56389R2	Set5	Year_2016	Athens	Rep1	127	3	52	3046.43	44.95	18.95	46
G14-1279R2	Pop3	G10PR-56248R2 x G10PR-56389R2	Set5	Year_2016	Athens	Rep1	113	2	57	3718.93	41.45	20.03	51
G14-1284R2	Pop3	G10PR-56248R2 x G10PR-56389R2	Set5	Year_2016	Athens	Rep1	135	4	57	3174.2	42.91	20.21	44
G14-1285R2	Pop3	G10PR-56248R2 x G10PR-56389R2	Set5	Year_2016	Athens	Rep1	119	2	51	2555.5	42.9	18.86	46
G14-1288R2	Pop3	G10PR-56248R2 x G10PR-56389R2	Set5	Year_2016	Athens	Rep1	111	1	58	2932.1	42.47	19.19	42
G14-1291R2	Pop3	G10PR-56248R2 x G10PR-56389R2	Set5	Year_2016	Athens	Rep1	132	3	57	3059.88	43.7	19.21	47
G14-1292R2	Pop3	G10PR-56248R2 x G10PR-56389R2	Set5	Year_2016	Athens	Rep1	101	1	48	3497	42.88	20.2	47
G14-1299R2	Pop3	G10PR-56248R2 x G10PR-56389R2	Set5	Year_2016	Athens	Rep1	121	2	49	2999.35	42.64	18.99	48
G14-1301R2	Pop3	G10PR-56248R2 x G10PR-56389R2	Set5	Year_2016	Athens	Rep1	130	3	55	2885.03	43.97	19.05	46
G14-1302R2	Pop3	G10PR-56248R2 x G10PR-56389R2	Set5	Year_2016	Athens	Rep1	140	4	52	3624.78	43.86	19.19	50
G14-1304R2	Pop3	G10PR-56248R2 x G10PR-56389R2	Set5	Year_2016	Athens	Rep1	142	4	50	3436.47	43.22	19.78	48
G14-1307R2	Pop3	G10PR-56248R2 x G10PR-56389R2	Set5	Year_2016	Athens	Rep1	114	2	56	3268.35	42.85	18.89	48
G14-1324R2	Pop3	G10PR-56248R2 x G10PR-56389R2	Set5	Year_2016	Athens	Rep1	107	1	54	2925.38	42.59	19.03	41
G14-1342R2	Pop3	G10PR-56248R2 x G10PR-56389R2	Set5	Year_2016	Athens	Rep1	112	2	58	3745.82	44.44	18.79	44
G14-1345R2	Pop3	G10PR-56248R2 x G10PR-56389R2	Set5	Year_2016	Athens	Rep1	124	3	49	3315.43	44.06	19.33	46
G14-1346R2	Pop3	G10PR-56248R2 x G10PR-56389R2	Set5	Year_2016	Athens	Rep1	139	4	53	2629.47	40.47	19.76	45
G14-1351R2	Pop3	G10PR-56248R2 x G10PR-56389R2	Set5	Year_2016	Athens	Rep1	118	2	52	3154.03	44.11	18.64	46
G14-1362R2	Pop3	G10PR-56248R2 x G10PR-56389R2	Set5	Year_2016	Athens	Rep1	133	3	58	3490.28	42.8	19.5	48
G14-1363R2	Pop3	G10PR-56248R2 x G10PR-56389R2	Set5	Year_2016	Athens	Rep1	137	4	55	2589.12	42.07	19.62	49
G14-1365R2	Pop3	G10PR-56248R2 x G10PR-56389R2	Set5	Year_2016	Athens	Rep1	120	2	50	3328.88	44.01	18.29	48
G14-1366R2	Pop3	G10PR-56248R2 x G10PR-56389R2	Set5	Year_2016	Athens	Rep1	103	1	50	3073.32	42.51	19.07	43
G14-1370R2	Pop3	G10PR-56248R2 x G10PR-56389R2	Set5	Year_2016	Athens	Rep1	116	2	54	3086.78	41.78	21.05	NA
G14-1390R2	Pop3	G10PR-56248R2 x G10PR-56389R2	Set5	Year_2016	Athens	Rep1	144	4	48	3564.25	42.42	18.79	49
G14-1393R2	Pop3	G10PR-56248R2 x G10PR-56389R2	Set5	Year_2016	Athens	Rep1	117	2	53	2851.4	44.05	19.14	45
G14-1394R2	Pop3	G10PR-56248R2 x G10PR-56389R2	Set5	Year_2016	Athens	Rep1	123	3	48	3275.07	41.67	19.68	46
G14-1440R2	Pop3	G10PR-56248R2 x G10PR-56389R2	Set5	Year_2016	Athens	Rep1	143	4	49	3497	44.02	18.63	45
G14-1450R2	Pop3	G10PR-56248R2 x G10PR-56389R2	Set5	Year_2016	Athens	Rep1	131	3	56	3315.43	44.87	18.46	43
G14-1462R2	Pop3	G10PR-56248R2 x G10PR-56389R2	Set5	Year_2016	Athens	Rep1	141	4	51	3611.32	43.94	19.03	45
G14-1469R2	Pop3	G10PR-56248R2 x G10PR-56389R2	Set5	Year_2016	Athens	Rep1	128	3	53	2959	44.1	18.81	43
G14-1471R2	Pop3	G10PR-56248R2 x G10PR-56389R2	Set5	Year_2016	Athens	Rep1	129	3	54	3214.55	43.76	18.73	48
G14-1515R2	Pop3	G10PR-56248R2 x G10PR-56389R2	Set5	Year_2016	Athens	Rep1	110	1	57	3887.05	43.95	18.41	46
G14-1518R2	Pop3	G10PR-56248R2 x G10PR-56389R2	Set5	Year_2016	Athens	Rep1	136	4	56	2891.75	43.68	18.35	47
AG6534	check	check	Set5	Year_2016	Athens	Rep2	242	8	50	2501.7	42.68	20.03	49
AG7733	check	check	Set5	Year_2016	Athens	Rep2	232	7	57	3059.88	41.79	19.3	50
G14-1210R2	Pop3	G10PR-56248R2 x G10PR-56389R2	Set5	Year_2016	Athens	Rep2	203	5	50	3214.55	44.78	17.79	50
G14-1211R2	Pop3	G10PR-56248R2 x G10PR-56389R2	Set5	Year_2016	Athens	Rep2	241	8	51	2568.95	42.88	19.58	45
G14-1212R2	Pop3	G10PR-56248R2 x G10PR-56389R2	Set5	Year_2016	Athens	Rep2	228	7	53	3026.25	41.92	20.32	50
G14-1215R2	Pop3	G10PR-56248R2 x G10PR-56389R2	Set5	Year_2016	Athens	Rep2	214	6	56	2716.9	43.83	18.33	52
G14-1220R2	Pop3	G10PR-56248R2 x G10PR-56389R2	Set5	Year_2016	Athens	Rep2	233	7	58	3147.3	43.15	20.7	48
G14-1221R2	Pop3	G10PR-56248R2 x G10PR-56389R2	Set5	Year_2016	Athens	Rep2	210	5	57	2817.78	43.61	19.52	48
G14-1232R2	Pop3	G10PR-56248R2 x G10PR-56389R2	Set5	Year_2016	Athens	Rep2	236	8	56	2568.95	42.48	19.82	49
G14-1236R2	Pop3	G10PR-56248R2 x G10PR-56389R2	Set5	Year_2016	Athens	Rep2	211	5	58	3335.6	42.59	18.44	51
G14-1256R2	Pop3	G10PR-56248R2 x G10PR-56389R2	Set5	Year_2016	Athens	Rep2	219	6	51	3093.5	42.99	19.87	46
G14-1277R2	Pop3	G10PR-56248R2 x G10PR-56389R2	Set5	Year_2016	Athens	Rep2	204	5	51	3463.38	42.85	19.38	50
G14-1278R2	Pop3	G10PR-56248R2 x G10PR-56389R2	Set5	Year_2016	Athens	Rep2	222	6	48	2851.4	44.13	19.87	47
G14-1279R2	Pop3	G10PR-56248R2 x G10PR-56389R2	Set5	Year_2016	Athens	Rep2	229	7	54	2911.93	41.93	19.48	54
G14-1284R2	Pop3	G10PR-56248R2 x G10PR-56389R2	Set5	Year_2016	Athens	Rep2	220	6	50	3046.43	42.39	20.52	45
G14-1285R2	Pop3	G10PR-56248R2 x G10PR-56389R2	Set5	Year_2016	Athens	Rep2	213	6	57	3268.35	43.56	20.22	50
G14-1288R2	Pop3	G10PR-56248R2 x G10PR-56389R2	Set5	Year_2016	Athens	Rep2	240	8	52	2831.22	43.92	19.77	48
G14-1291R2	Pop3	G10PR-56248R2 x G10PR-56389R2	Set5	Year_2016	Athens	Rep2	202	5	49	3086.78	43.6	19.2	48
G14-1292R2	Pop3	G10PR-56248R2 x G10PR-56389R2	Set5	Year_2016	Athens	Rep2	223	7	48	3147.3	43.01	20.25	47
[truncated: 3,201 more rows]
